# Supplementary material for: Heliphyrin: a ring open porphyrinoid with helical chirality
Source: Royal Society of Chemistry journal article supplement (doi:10.1039/d4qi00743c), 2024-01-01
Supplement: d4qi00743c1.pdf [file d4qi00743c1.pdf]

# **Heliphyrin: An open porphyrinoid with helical chirality.**

Briana R. Schrage,<sup>†</sup> Sanjay Gaire,<sup>†</sup> Kirsty Mamattah,<sup>†</sup> Dustin E. Nevonon,<sup>§</sup> Victor N. Nemykin,<sup>§</sup>  
and Christopher J. Ziegler<sup>†</sup>

<sup>†</sup> *Department of Chemistry, University of Akron, Akron, Ohio 44312-3601, United States*

<sup>§</sup> *Department of Chemistry, University of Tennessee, Knoxville, TN 37996, United States*

## **Supplementary Information**

## Table of Contents

|                                                                                                                                                                              | Page |
|------------------------------------------------------------------------------------------------------------------------------------------------------------------------------|------|
| General Information                                                                                                                                                          | S4-5 |
| Full Citation for Gaussian                                                                                                                                                   | S6   |
| Syntheses                                                                                                                                                                    | S7-8 |
| <b>Figure S1:</b> $^1\text{H}$ NMR (300 MHz) of <b>1</b> in $d_6$ -DMSO.                                                                                                     | S9   |
| <b>Figure S2:</b> $^{13}\text{C}\{^1\text{H}\}$ NMR (125 MHz) of <b>1</b> in $d_6$ -DMSO.                                                                                    | S10  |
| <b>Figure S2:</b> $^1\text{H}$ NMR (125 MHz) of <b>Ni(Hlp)</b> in $d_6$ -DMSO.                                                                                               | S11  |
| <b>Figure S3:</b> High-resolution ESI mass spectra of <b>1</b> .                                                                                                             | S12  |
| <b>Figure S4:</b> High-resolution ESI mass spectra of <b>Co(Hlp)(DMF)</b> .                                                                                                  | S13  |
| <b>Figure S5:</b> High-resolution ESI mass spectra of <b>Ni(Hlp)</b> .                                                                                                       | S14  |
| <b>Figure S6:</b> High-resolution ESI mass spectra of <b>Cu(Hlp)</b> .                                                                                                       | S15  |
| <b>Figure S7:</b> UV-visible spectrum for <b>1</b> in DMF solution.                                                                                                          | S16  |
| <b>Figure S8:</b> Cyclic voltammograms for <b>Co(Hlp)(DMF)</b><br>recorded in the DMF/0.1 TBAPF <sub>6</sub> system at room temperature.                                     | S17  |
| <b>Figure S9:</b> Cyclic voltammograms for <b>Ni(Hlp)</b><br>recorded in the DMF/0.1 TBAPF <sub>6</sub> system at room temperature.                                          | S18  |
| <b>Figure S10:</b> Cyclic voltammograms for <b>Cu(Hlp)</b><br>recorded in the DMF/0.1 TBAPF <sub>6</sub> system at room temperature.                                         | S19  |
| <b>Figure S11:</b> DFT-predicted frontier orbitals for <b>1</b> and <b>M(Hlp)</b> complexes.                                                                                 | S20  |
| <b>Figure S12:</b> Relative energies of the frontier orbitals for<br><b>1</b> and <b>M(Hlp)</b> complexes ( $\alpha$ -spin).                                                 | S21  |
| <b>Figure S13:</b> Relative energies of the frontier orbitals for<br><b>1</b> and <b>M(Hlp)</b> complexes ( $\beta$ -spin).                                                  | S21  |
| <b>Figure S14:</b> Relative energies of the frontier orbitals for <b>1</b> and <b>M(Hlp)</b> with<br>and without tartaric acid.                                              | S22  |
| <b>Figure S15:</b> Experimental and calculated spectra of <b>Co(Hlp)</b> in the presence of<br>one equivalent (right) and three equivalents (left) of D and L tartaric acid. | S23  |
| <b>Table S1:</b> X-ray crystal data and structure parameters<br>for compounds <b>1</b> and <b>M(Hlp)</b> complexes.                                                          | S24  |
| <b>Table S2:</b> B3LYP TDDFT-predicted energies and expansion coefficients for<br>compound <b>1</b> (only excited states with $f > 0.05$ and $\lambda > 270$ nm are listed). | S25  |
| <b>Table S3:</b> B3LYP TDDFT-predicted energies and expansion coefficients for<br>compound <b>Co(Hlp)(DMF)</b> (only excited states with $f > 0.05$ and $\lambda > 270$ nm   | S26  |

are listed).

|                                                                                                                                                                                                                     |     |
|---------------------------------------------------------------------------------------------------------------------------------------------------------------------------------------------------------------------|-----|
| <b>Table S4:</b> B3LYP TDDFT-predicted energies and expansion coefficients for compound <b>Ni(Hlp)</b> (only excited states with $f > 0.05$ and $\lambda > 270$ nm are listed).                                     | S30 |
| <b>Table S5:</b> B3LYP TDDFT-predicted energies and expansion coefficients for compound <b>Cu(Hlp)</b> (only excited states with $f > 0.05$ and $\lambda > 270$ nm are listed).                                     | S32 |
| <b>Table S6:</b> B3LYP DFT optimized geometry of compound <b>1</b> .                                                                                                                                                | S36 |
| <b>Table S7:</b> B3LYP DFT optimized geometry of compound <b>Co(Hlp)(DMF)</b> .                                                                                                                                     | S37 |
| <b>Table S8:</b> B3LYP DFT optimized geometry of compound <b>Ni(Hlp)</b> .                                                                                                                                          | S39 |
| <b>Table S9:</b> B3LYP DFT optimized geometry of compound <b>Cu(Hlp)</b> .                                                                                                                                          | S41 |
| <b>Table S10:</b> Major TDDFT-predicted excited state contributions for <b>Ni</b> , <b>Cu</b> , <b>Co_3TA</b> , <b>Co_1TA_OptFreqPlus</b> , and <b>Co_1TA_TD70</b> using the B3LYP exchange correlation functional. | S43 |

## General Information

### Experimental

All reagents and starting materials were purchased from commercial vendors and used without further purification. 1,3-diiminoisoindoline (DII) was synthesized according to previously published procedures.<sup>1</sup> Deuterated solvents were purchased from Cambridge Isotope Laboratories and used as received.

NMR spectra were recorded on 300 MHz and 500 MHz spectrometers and chemical shifts were given in ppm relative to residual solvent resonances (<sup>1</sup>H NMR and <sup>13</sup>C NMR spectra). High-resolution mass spectrometry experiments were performed on a Bruker MicroTOF-III and MicroTOF-qIII instruments. Infrared spectra were collected on Thermo Scientific Nicolet iS5 that was equipped with an iD5 ATR. UV-visible spectra were recorded on a Shimadzu UV-2600 UV-visible spectrometer.

X-ray intensity data were measured on a Bruker PHOTON II CPAD-based diffractometer with dual Cu/Mo ImuS microfocus optics (Cu K $\alpha$  radiation,  $\lambda = 1.54178 \text{ \AA}$ , Mo K $\alpha$  radiation,  $\lambda = 0.71073 \text{ \AA}$ ). Crystals were mounted on a cryoloop using Paratone oil and placed under a stream of nitrogen at 100 K (Oxford Cryosystems). The detector was placed at a distance of 5.00 cm from the crystal. The data were corrected for absorption with the SADABS program. The structures were refined using the Bruker SHELXTL Software Package (Version 6.1),<sup>2</sup> and were solved using direct methods until the final anisotropic full-matrix, least squares refinement of  $F^2$  converged.

Electrochemistry measurements were conducted using a CHI 820D potentiostat in a standard three-electrode configuration. Platinum wire was used as the counter electrode. The working electrode used was a 2 mm diameter platinum disk. A nonaqueous Ag/Ag<sup>+</sup> reference electrode was used by immersing silver wire in a degassed DMF solution of 0.01 M AgNO<sub>3</sub> / 0.1 M tetrabutylammonium hexafluorophosphate (TBAPF<sub>6</sub>). All potentials were referenced to the

ferrocene/ferrocenium couple. The concentration of analyte was 1.0 mM, and the supporting electrolyte was 0.1 M TBAPF<sub>6</sub> dissolved in DMF.

### **Separation of Enantiomers**

Enantiomeric separations of the three heliphyrin complexes were carried out by HPLC purification performed on a GE Äkta Purifier equipped with a UV900 detector and a 5 µm CHIRALPAK IE (Daicel) column. The solvent system used was 80%/20%/0.1% EtOH/hexane/DMF v/v/v. The detector was set to measure absorption at 254 nm.

### **Computational Details**

The starting geometries of compounds **1** and **M(Hlp)s** were optimized using a B3LYP exchange–correlation functional.<sup>3</sup> Energy minima in optimized geometry were confirmed by the frequency calculations (absence of the imaginary frequencies). The solvent effect was modeled using the polarized continuum model (PCM).<sup>4</sup> In all calculations, DMF was used as the solvent. In PCM-TDDFT calculation, the first 100 states were calculated. The Co, Ni, and Cu atoms were modeled using the 6-311+G basis set.<sup>5</sup> All other atoms were modeled using the 6-311G(d)<sup>6</sup> basis set. Gaussian 09 software was used in all calculations.<sup>7</sup> The QMForge program was used for molecular orbital analysis in all cases.<sup>8</sup>

## Full citation for Gaussian

Gaussian 09, Revision D.01., Frisch, M. J.; Trucks, G. W.; Schlegel, H. B.; Scuseria, G. E.; Robb, M. A.; Cheeseman, J. R.; Montgomery, Jr., J. A.; Vreven, T.; Kudin, K. N.; Burant, J. C.; Millam, J. M.; Iyengar, S. S.; Tomasi, J.; Barone, V.; Mennucci, B.; Cossi, M.; Scalmani, G.; Rega, N.; Petersson, G. A.; Nakatsuji, H.; Hada, M.; Ehara, M.; Toyota, K.; Fukuda, R.; Hasegawa, J.; Ishida, M.; Nakajima, T.; Honda, Y.; Kitao, O.; Nakai, H.; Klene, M.; Li, X.; Knox, J. E.; Hratchian, H. P.; Cross, J. B.; Adamo, C.; Jaramillo, J.; Gomperts, R.; Stratmann, R. E.; Yazyev, O.; Austin, A. J.; Cammi, R.; Pomelli, C.; Ochterski, J. W.; Ayala, P. Y.; Morokuma, K.; Voth, G. A.; Salvador, P.; Dannenberg, J. J.; Zakrzewski, V. G.; Dapprich, S.; Daniels, A. D.; Strain, M. C.; Farkas, O.; Malick, D. K.; Rabuck, A. D.; Raghavachari, K.; Foresman, J. B.; Ortiz, J. V.; Cui, Q.; Baboul, A. G.; Clifford, S.; Cioslowski, J.; Stefanov, B. B.; Liu, G.; Liashenko, A.; Piskorz, P.; Komaromi, I.; Martin, R. L.; Fox, D. J.; Keith, T.; Al-Laham, M. A.; Peng, C. Y.; Nanayakkara, A.; Challacombe, M.; Gill, P. M. W.; Johnson, B.; Chen, W.; Wong, M. W.; Gonzalez, C.; Pople, J. A. Gaussian, Inc., Wallingford CT, 2009.

## Syntheses.

DII (1.00 g, 6.9 mmol) and (2-benzimidazolyl)acetonitrile (1.08 g, 6.9 mmol) were dissolved in EtOH (10 mL) and refluxed for 1 hour. The resulting solution was cooled down to room temperature, filtered, and washed with cold EtOH to give orange powder. Crystals suitable for X-ray diffraction were grown from slow evaporation from DMF.

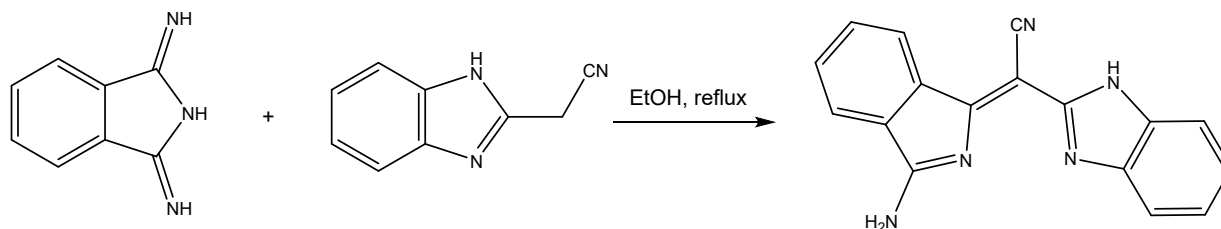

**1**: Yield: 1.94 g (98%). IR: 3546, 3378, 3011  $\text{cm}^{-1}$  ( $\nu_{\text{NH}}$ ), 2210  $\text{cm}^{-1}$  ( $\nu_{\text{CN}}$ ).  $^1\text{H}$  NMR (300 MHz,  $\text{CDCl}_3$ ):  $\delta$  = 12.71 (s, 1H, NH), 9.35 (s, 1H, NH), 9.14 (s, 1H, NH), 8.37 (d, 1H,  $J$  = 7.58 Hz), 8.09 (d, 1H,  $J$  = 7.25 Hz), 7.75 (t, 1H,  $J$  = 7.58 Hz), 7.70-7.65 (m, 2H), 7.55 (d, 1H,  $J$  = 6.92 Hz), 7.22 (m, 2H).  $^{13}\text{C}\{^1\text{H}\}$  NMR (125 MHz,  $d_6$ -DMSO):  $\delta$  = 168.6, 161.8, 149.0, 144.8, 143.2, 138.3, 133.9, 133.2, 131.8, 130.5, 123.2, 122.4, 121.9, 118.8, 117.6, 111.3, 84.4. HRMS (ESI-TOF, negative mode)  $m/z$ : calcd for  $\text{C}_{17}\text{H}_{10}\text{N}_5$  284.0942, found 284.0927 [ $\text{M-H}$ ]<sup>-</sup>.

**Synthesis of Metal complexes.** A solution of  $\text{M}(\text{OAc})_2$  hydrate ( $\text{M} = \text{Co}, \text{Ni}, \text{Cu}$ ) (0.35 mmol), and two equivalents of **1** (0.20 g, 0.70 mmol) in MeOH (7.00 mL) were refluxed in an oil bath for 1 hour. The resultant precipitate was filtered and washed with hot MeOH. The compounds were isolated as dark blue solids. Crystals suitable for X-ray diffraction were grown by slow evaporation of DMF. The copper complex had one equivalent of disordered DMF in the unit cell that was removed by use of the SQUEEZE program.<sup>9</sup>

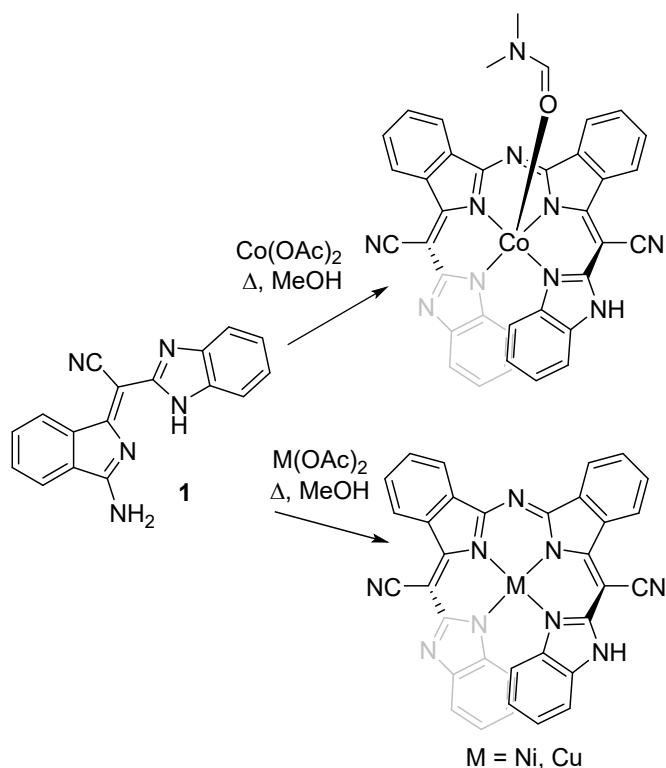

**Co(Hlp)(DMF):** Yield: 0.16 g (67%). IR: 3055, 2916  $\text{cm}^{-1}$  ( $\nu_{\text{NH}}$ ), 2214  $\text{cm}^{-1}$  ( $\nu_{\text{CN}}$ ). HRMS (ESI TOF, negative mode)  $m/z$ : calcd for  $\text{C}_{34}\text{H}_{16}\text{CoN}_9$  609.0866, found 609.0831  $[\text{M-H}]^-$ .

**Ni(Hlp):** Yield: 0.18 g (84%). IR: 3059  $\text{cm}^{-1}$  ( $\nu_{\text{NH}}$ ), 2219  $\text{cm}^{-1}$  ( $\nu_{\text{CN}}$ ).  $^1\text{H}$  NMR (300 MHz, DMSO): 9.24 (s, 2H), 8.90 (s, 1H, NH), 8.05 (d, 1H), 7.74 (t, 2H), 7.58 (d, 1H), 6.68 (s, 8H). HRMS (ESI-TOF, negative mode)  $m/z$ : calcd for  $\text{C}_{34}\text{H}_{16}\text{N}_9\text{Ni}$  608.0888 found 608.0908  $[\text{M-H}]^-$ .

**Cu(Hlp):** Yield: 0.14 g (65%). IR: 3077, 2919  $\text{cm}^{-1}$  ( $\nu_{\text{NH}}$ ), 2213  $\text{cm}^{-1}$  ( $\nu_{\text{CN}}$ ). HRMS (ESI-TOF, negative mode)  $m/z$ : calcd for  $\text{C}_{34}\text{H}_{16}\text{CuN}_9$  613.0825, found 613.0798  $[\text{M-H}]^-$ .



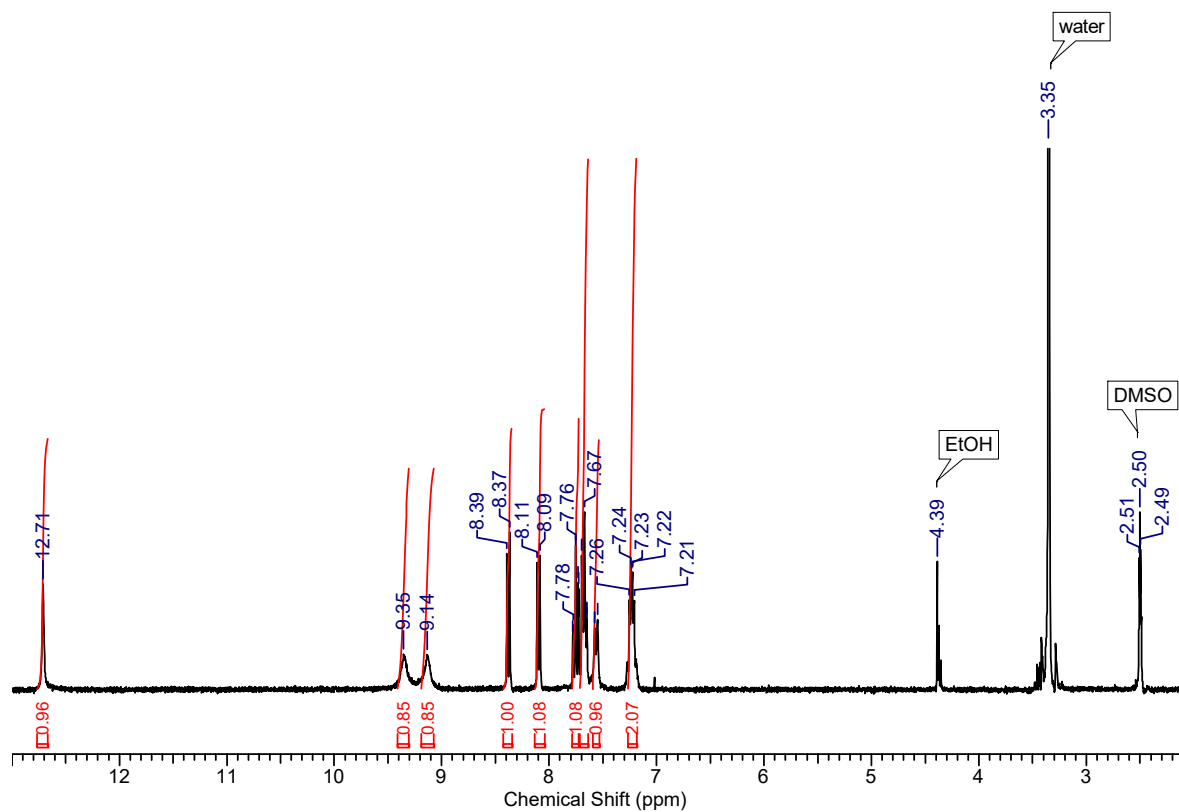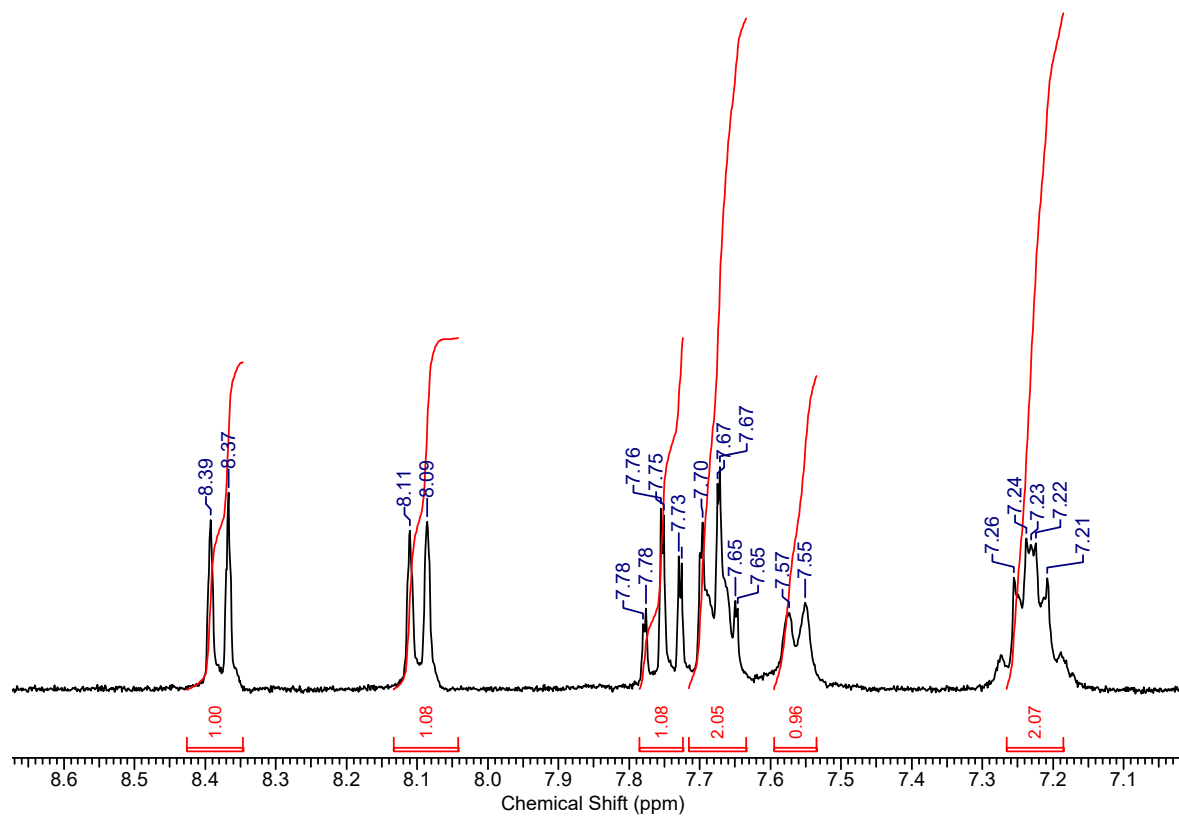

Figure S1:  $^1\text{H}$  NMR (300 MHz) of **1** in  $\text{d}_6\text{-DMSO}$ .

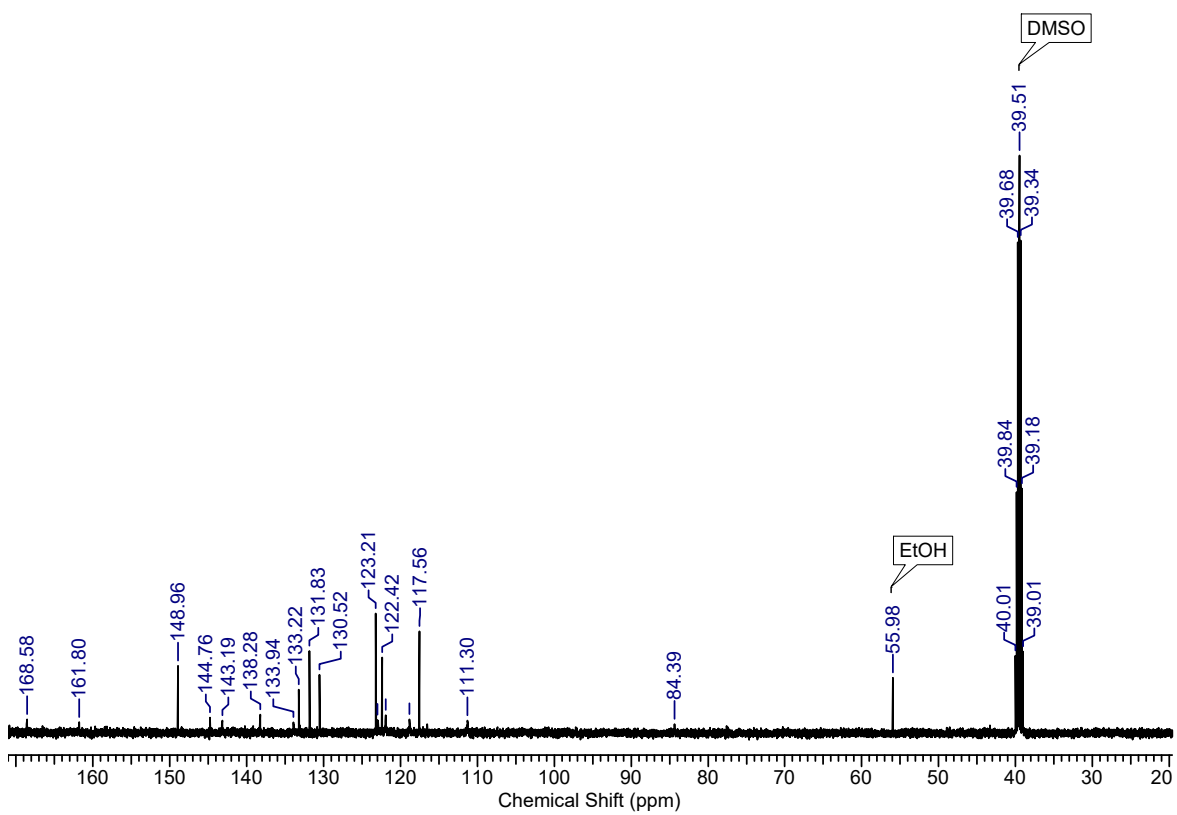

Figure S2:  $^{13}\text{C}\{^1\text{H}\}$  NMR (125 MHz) of **1** in d<sub>6</sub>-DMSO.

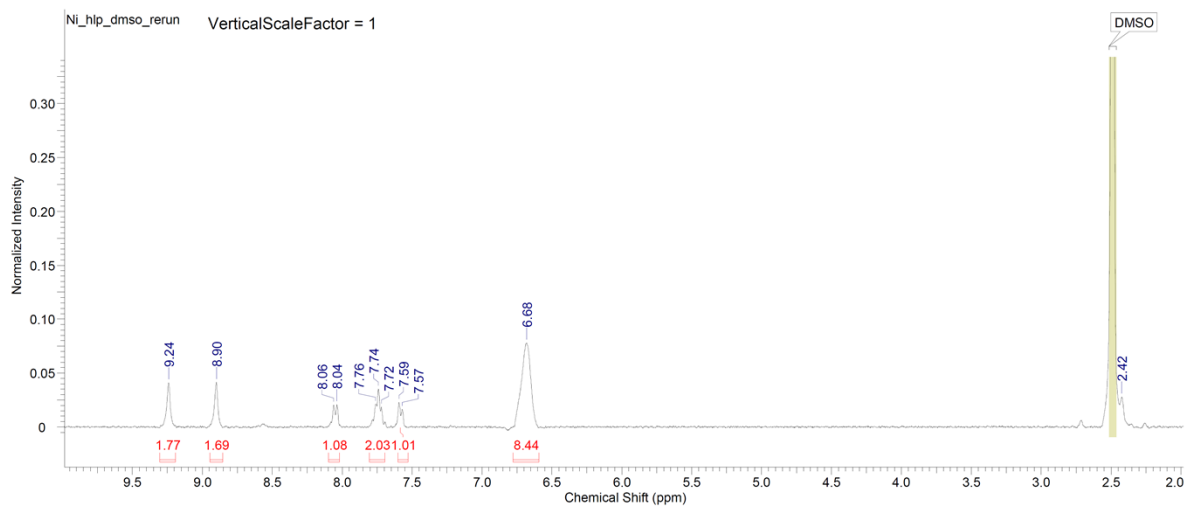

**Figure S3:**  $^1\text{H}$  NMR (125 MHz) of **Ni(Hlp)** in  $\text{d}_6\text{-DMSO}$ .

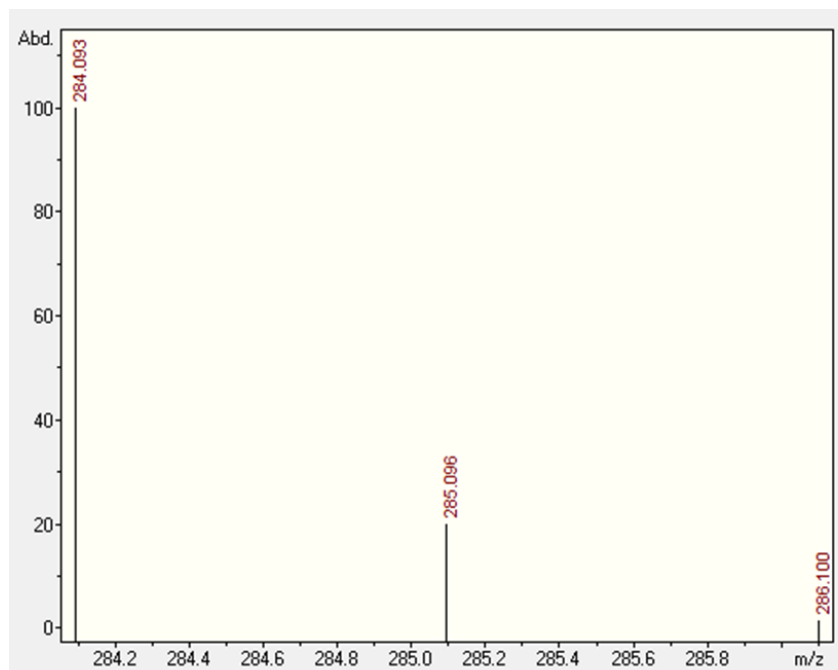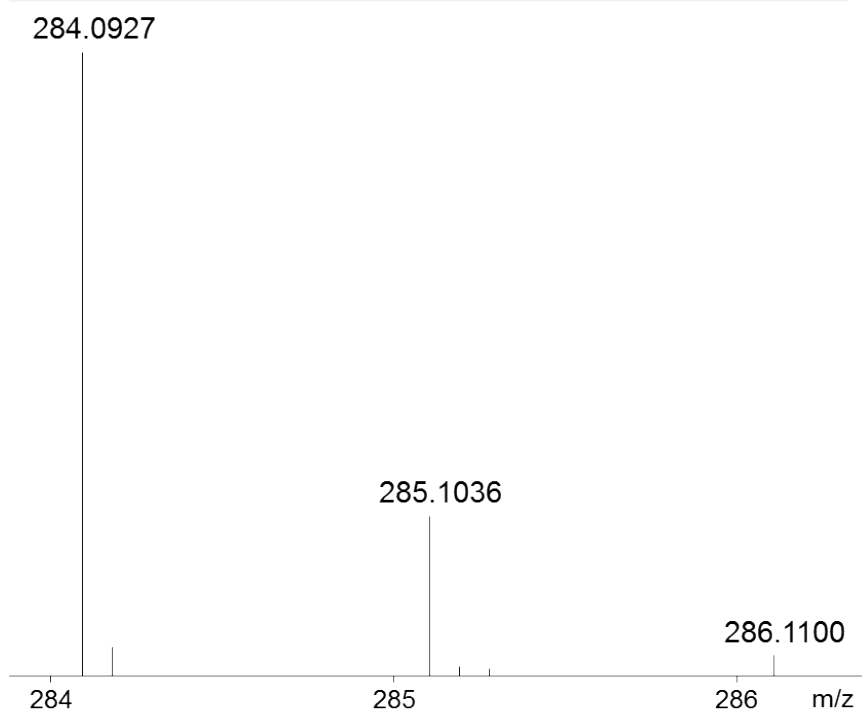

**Figure S4:** High-resolution ESI mass spectra of **1**. Top: calculated spectrum. Bottom: experimental spectrum.

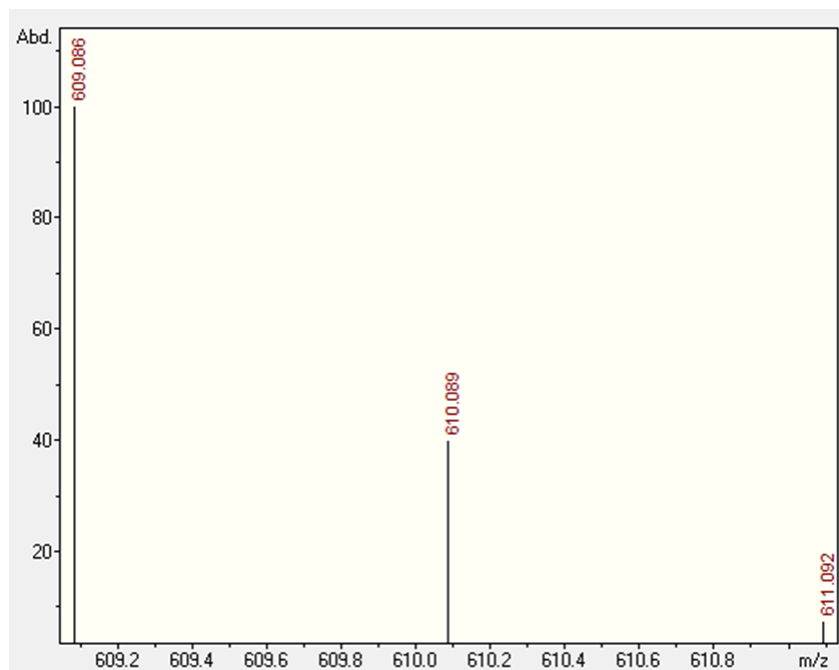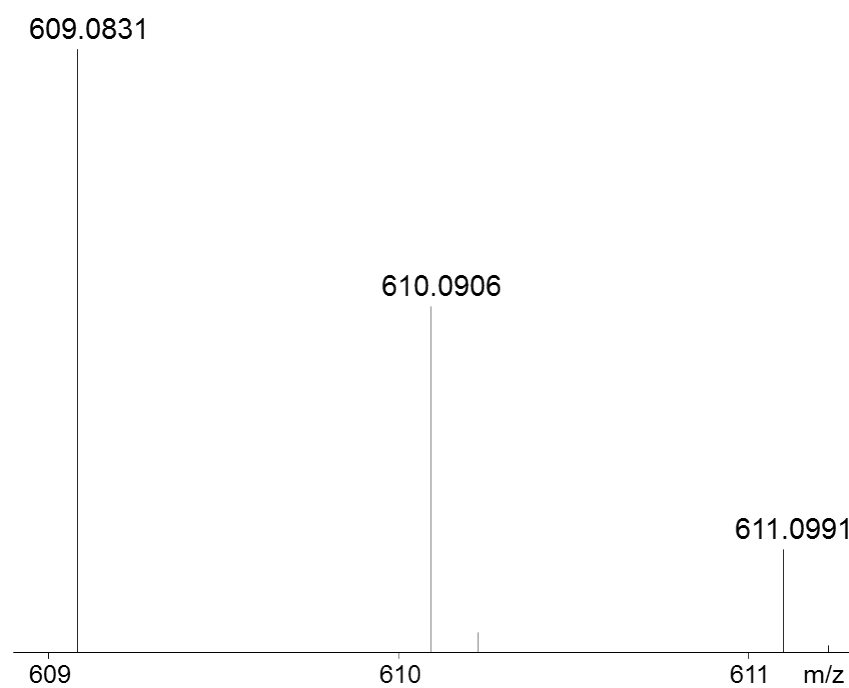

**Figure S5:** High-resolution ESI mass spectra of  $\text{Co(Hlp)(DMF)}$ . Top: calculated spectrum. Bottom: experimental spectrum.

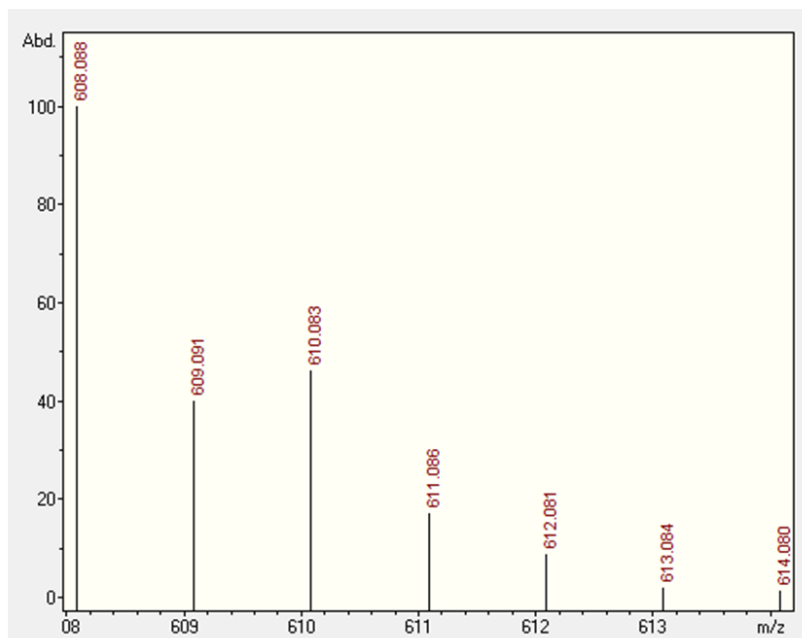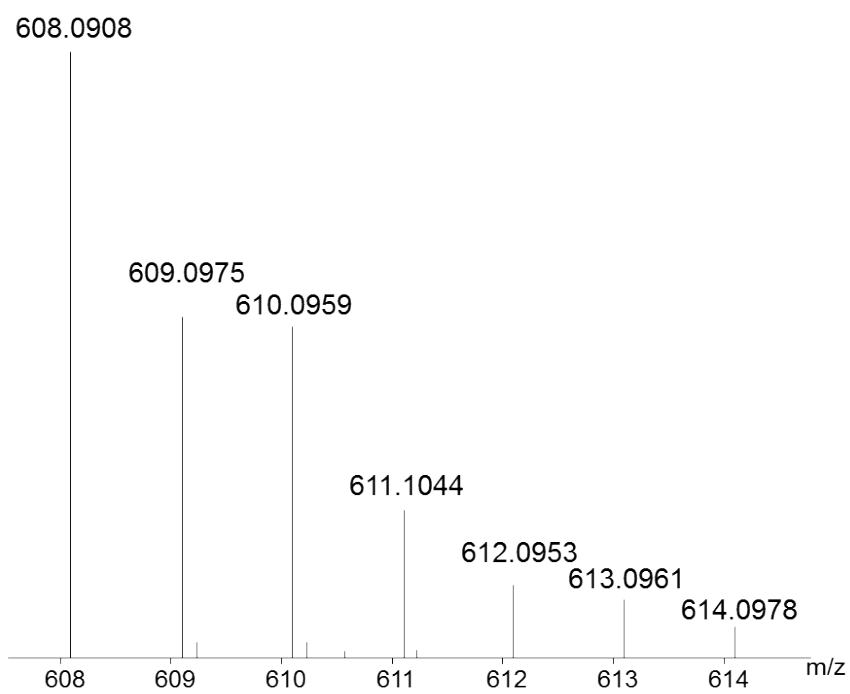

**Figure S6:** High-resolution ESI mass spectra of **Ni(Hlp)**. Top: calculated spectrum. Bottom: experimental spectrum.

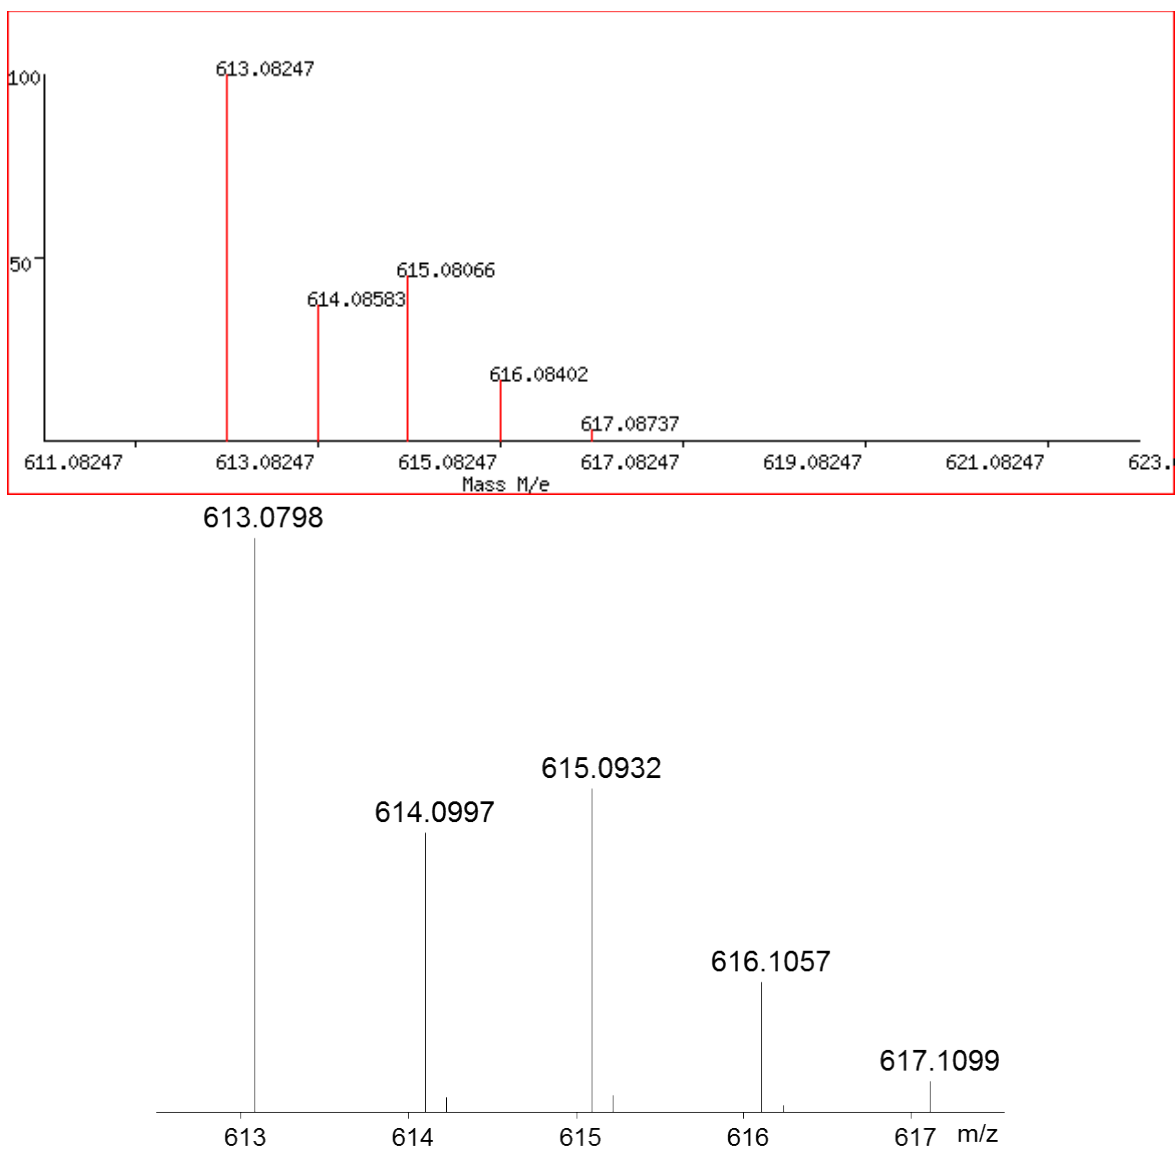

**Figure S7:** High-resolution ESI mass spectra of **Cu(Hlp)**. Top: calculated spectrum. Bottom: experimental spectrum.

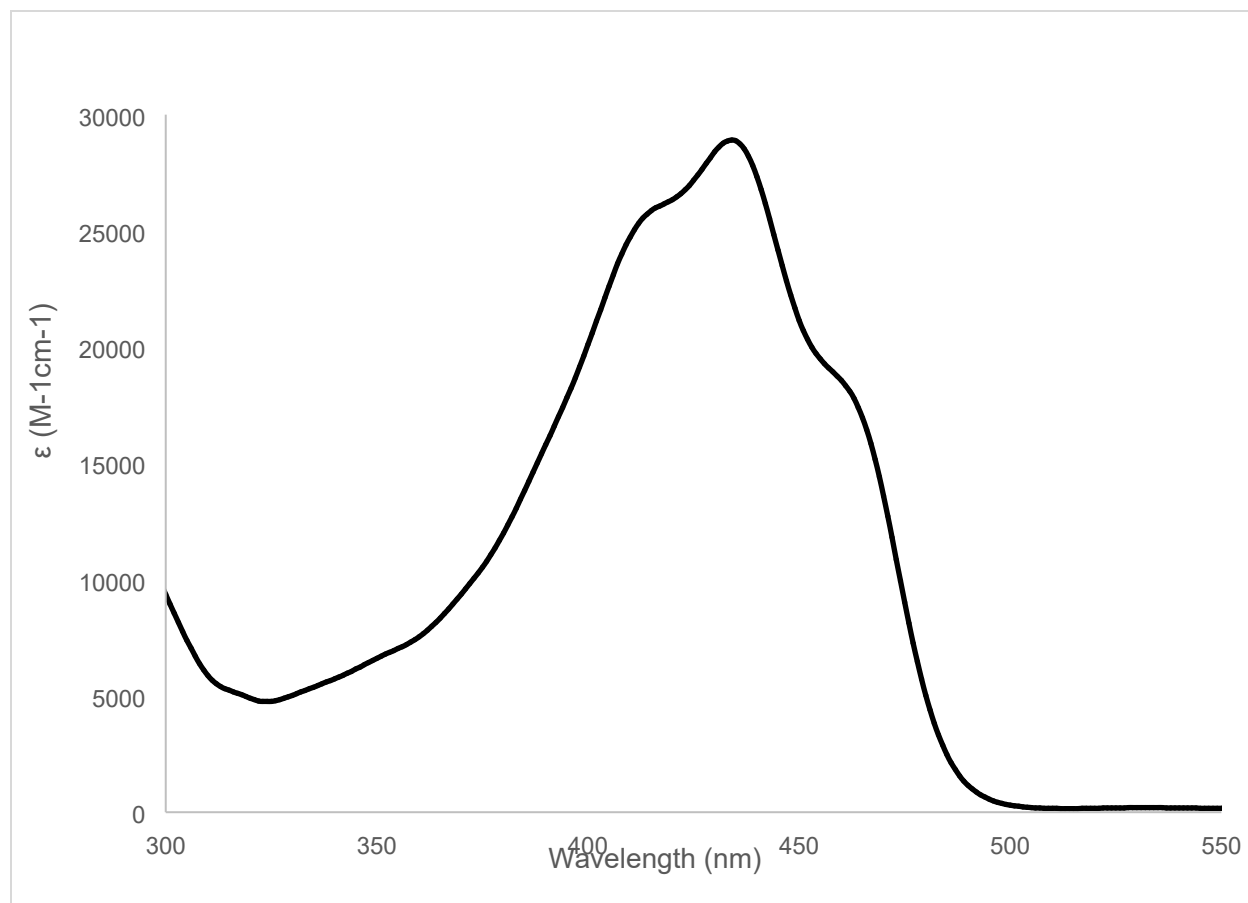

**Figure S8:** UV-visible spectrum for compound **1** in DMF.



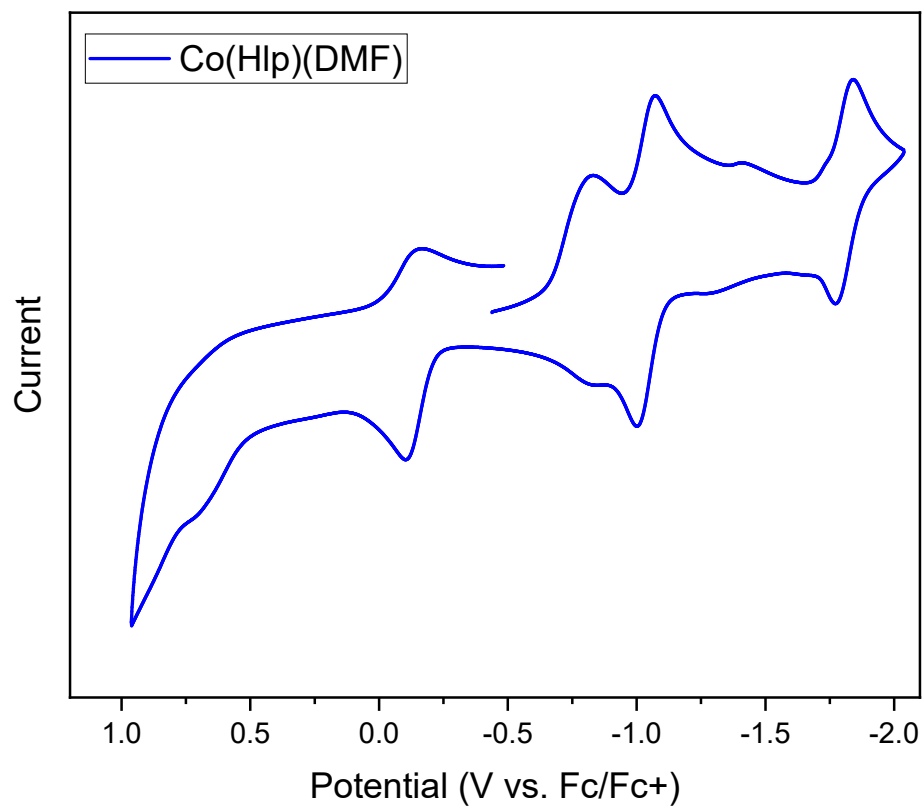

| Compound          | Potentials V                      |
|-------------------|-----------------------------------|
| Co(Hlp)(DMF)(red) | -0.17, -0.83, -1.08, -1.42, -1.84 |
| Co(Hlp)(DMF)(ox)  | 0.75, -0.066, -0.96, -1.74        |

**Figure S9:** Cyclic voltammograms for **Co(Hlp)(DMF)** recorded in the DMF/0.1 TBAPF<sub>6</sub> system at room temperature. Redox potentials (V) vs Fc/Fc<sup>+</sup> are displayed in the table.

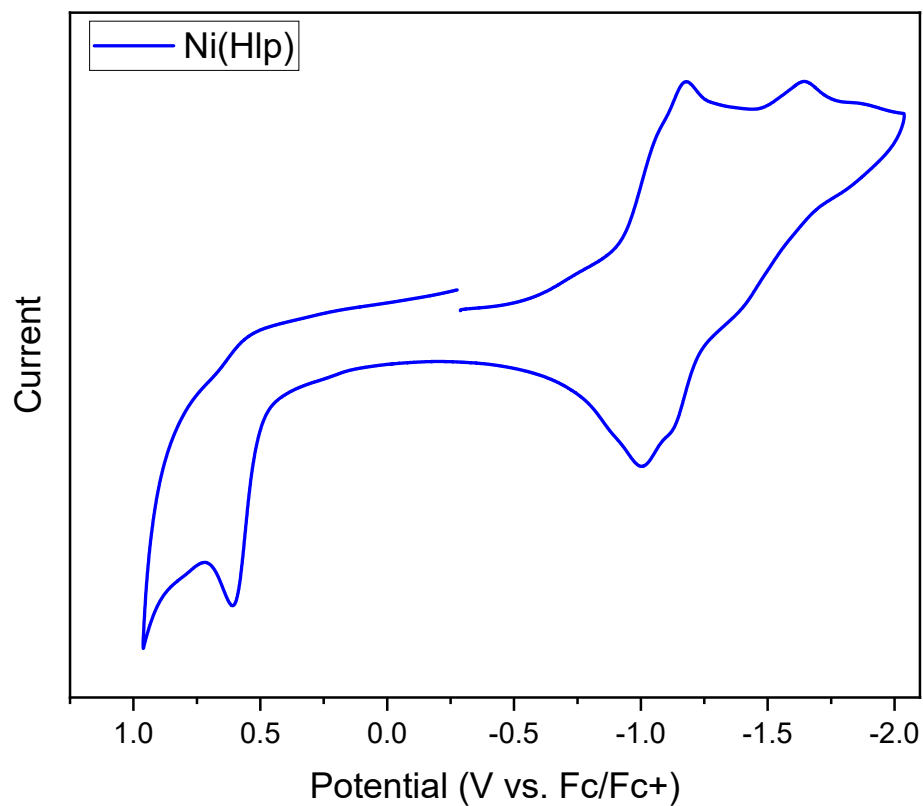

| Compound     | Potentials V |
|--------------|--------------|
| Ni(Hlp)(red) | -1.18, -1.64 |
| Ni(Hlp)(ox)  | 0.61, -1.00  |

**Figure S10:** Cyclic voltammograms for **Ni(Hlp)** recorded in the DMF/0.1 TBAPF<sub>6</sub> system at room temperature. Redox potentials (V) vs Fc/Fc<sup>+</sup> are displayed in the table.

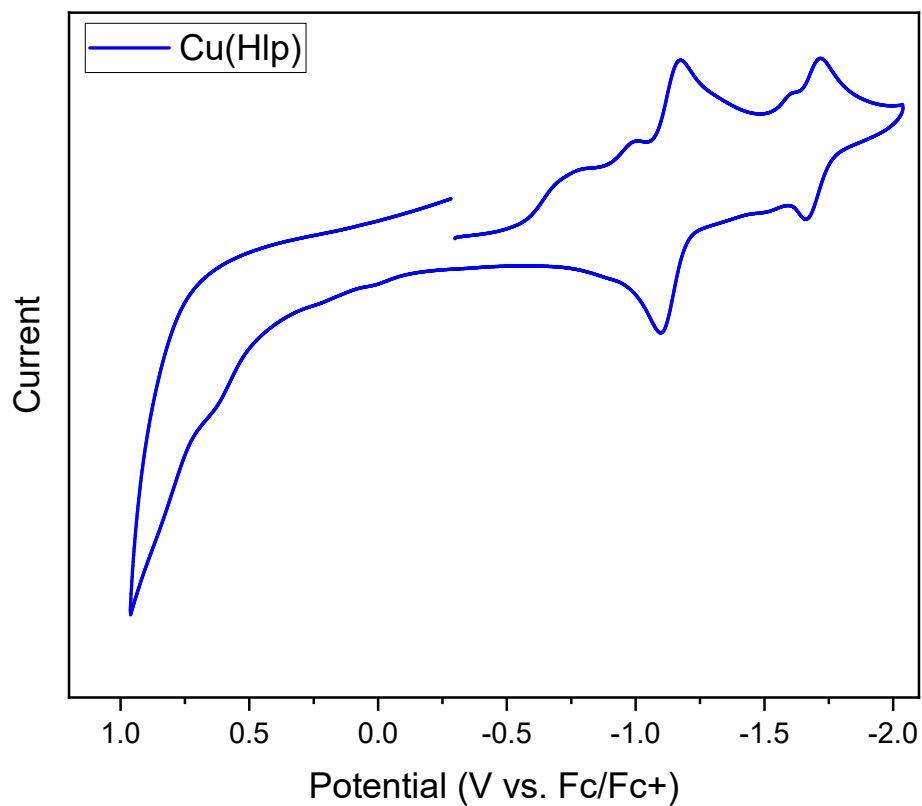

| Compound     | Potentials V                      |
|--------------|-----------------------------------|
| Cu(Hlp)(red) | -0.72, -1.00, -1.18, -1.60, -1.72 |
| Cu(Hlp)(ox)  | 0.65, -1.10, -1.66                |

**Figure S11:** Cyclic voltammograms for **Cu(Hlp)** recorded in the DMF/0.1 TBAPF<sub>6</sub> system at room temperature. Redox potentials (V) vs Fc/Fc<sup>+</sup> are displayed in the table.

Compound

HOMO

LUMO

1

Co(Hlp)(DMF)

Ni(Hlp)

Cu(Hlp)

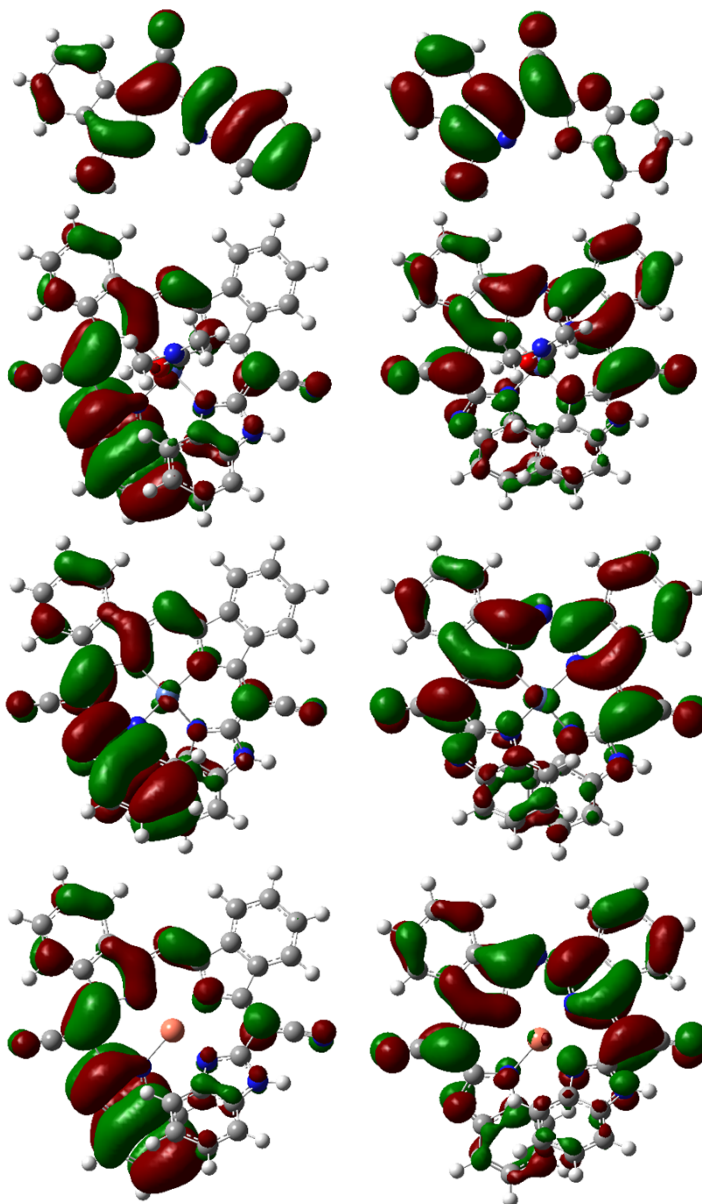

Figure S12: DFT-predicted frontier orbitals for 1 and M(Hlp) complexes.

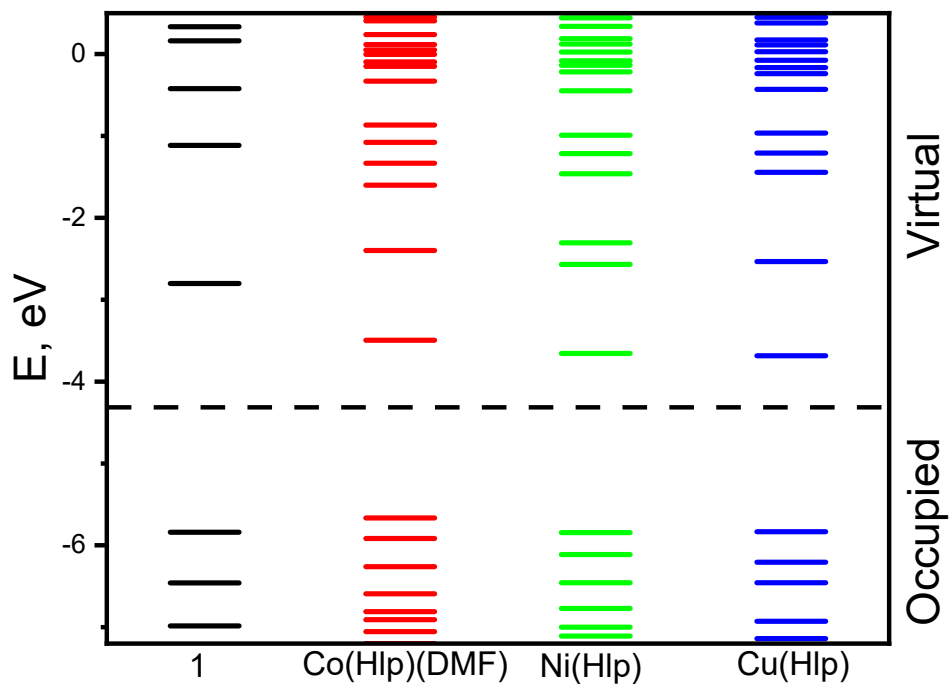

**Figure S13:** Relative energies of the frontier orbitals for **1** and **M(Hlp)** complexes ( $\alpha$ -spin).

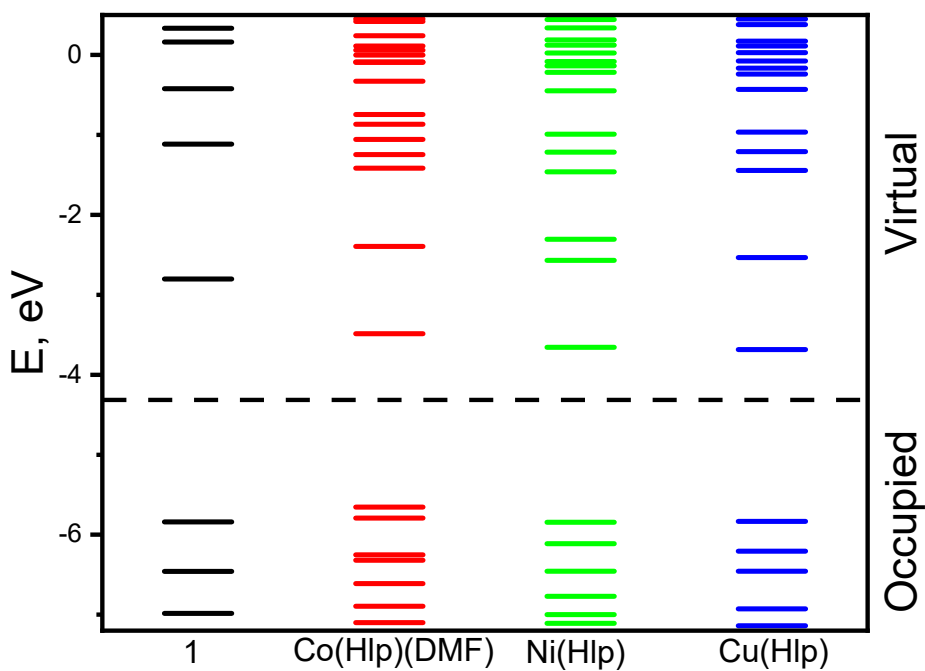

**Figure S14:** Relative energies of the frontier orbitals for **1** and **M(Hlp)** complexes ( $\beta$ -spin).

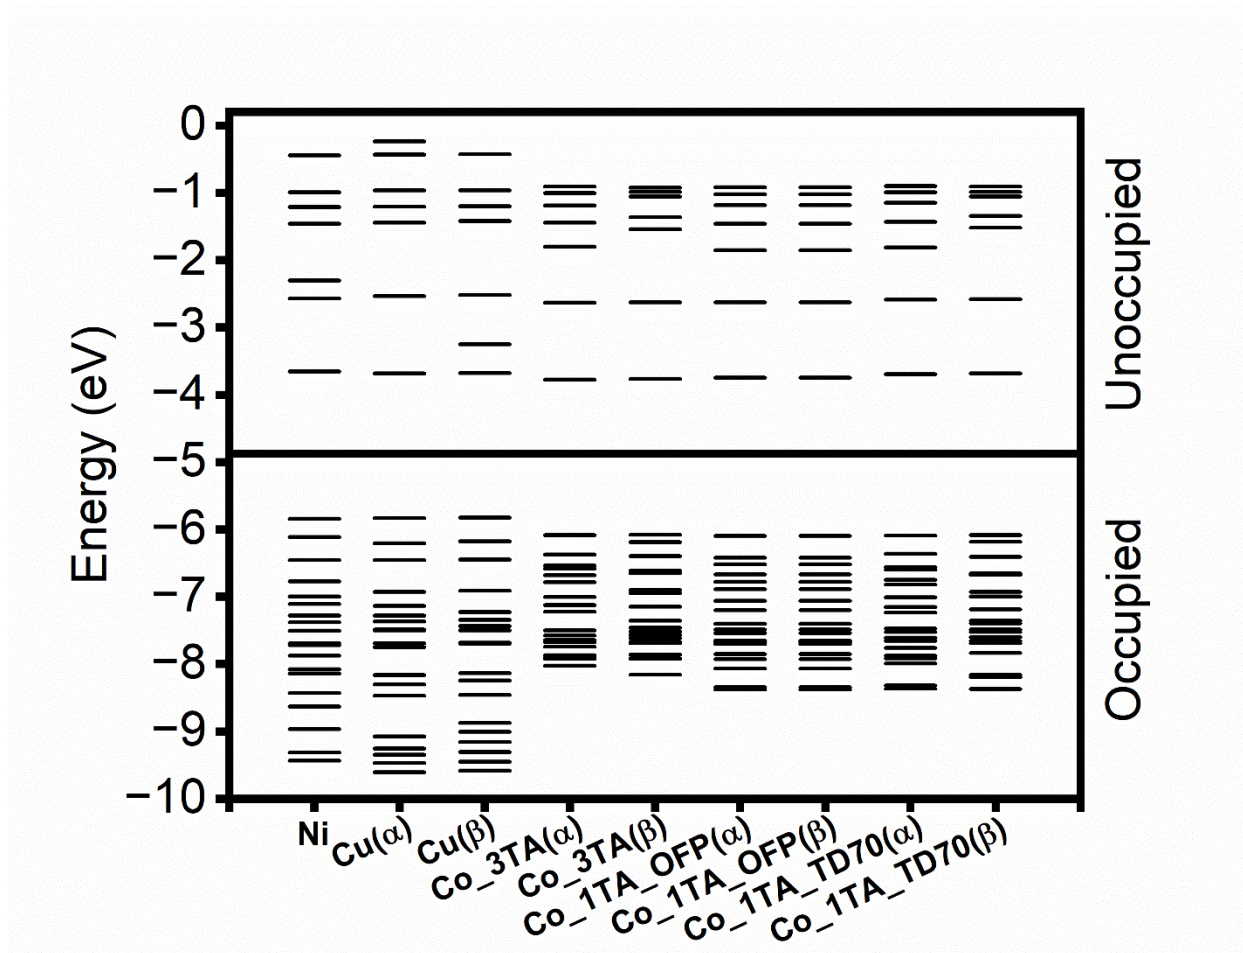

**Figure S15:** Relative energies of the frontier orbitals for **1** and **M(HIp)** with and without tartaric acid.

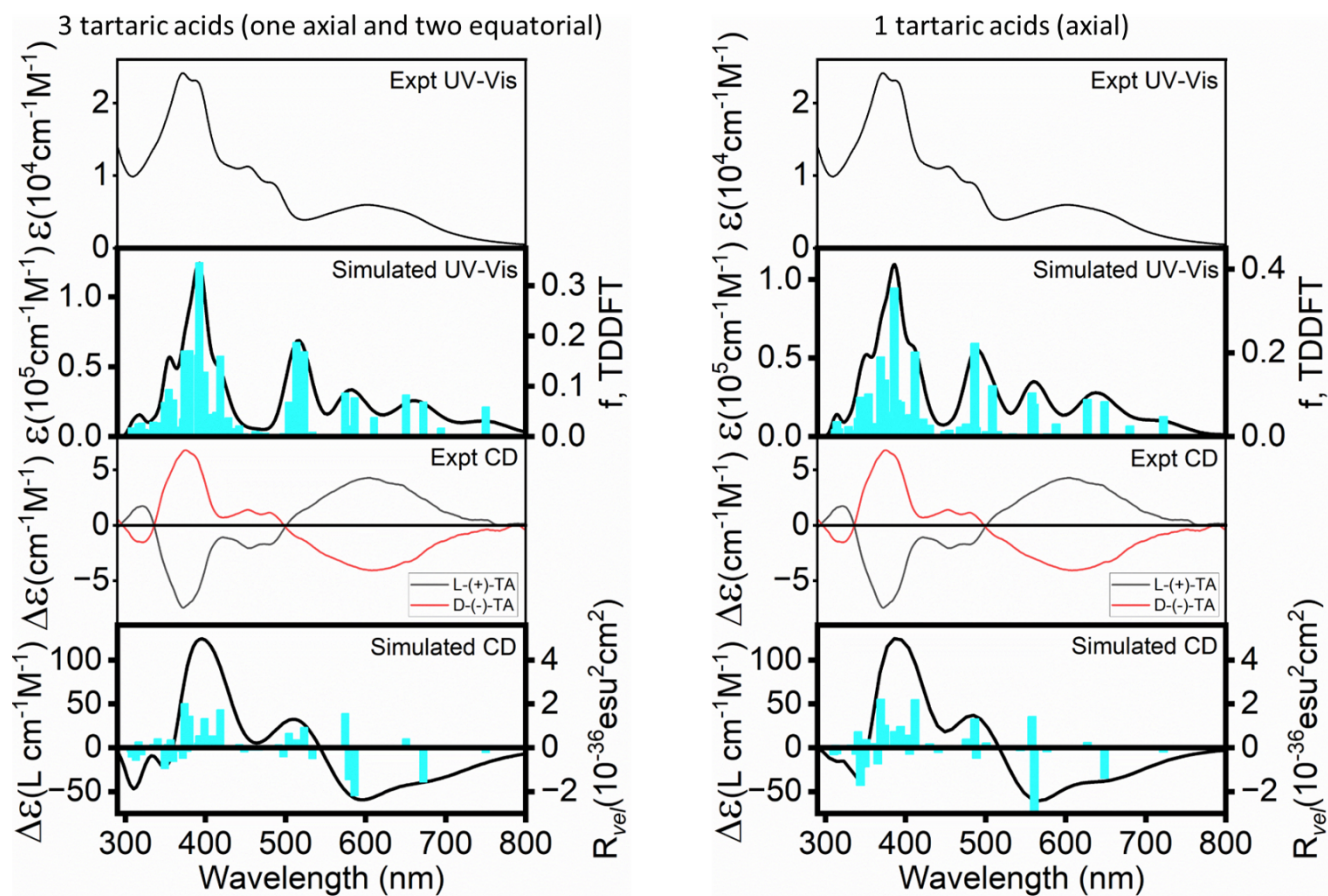

**Figure S16:** Experimental and calculated spectra of Co(Hlp) in the presence of one equivalent (right) and three equivalents (left) of D and L tartaric acid.

**Table S1:** X-ray crystal data and structure parameters for compounds **1** and **M(Hlp)** complexes.

| Compound                                         | <b>1</b>                                          | <b>Co(Hlp)(DMF)</b>                                 | <b>Ni(Hlp)</b>                                      | <b>Cu(Hlp)</b>                                   |
|--------------------------------------------------|---------------------------------------------------|-----------------------------------------------------|-----------------------------------------------------|--------------------------------------------------|
| CCDC                                             |                                                   |                                                     |                                                     |                                                  |
| Empirical formula                                | C <sub>37</sub> H <sub>29</sub> N <sub>11</sub> O | C <sub>37</sub> H <sub>24</sub> CoN <sub>10</sub> O | C <sub>37</sub> H <sub>24</sub> N <sub>10</sub> NiO | C <sub>34</sub> H <sub>17</sub> CuN <sub>9</sub> |
| Formula weight                                   | 643.71                                            | 683.59                                              | 683.37                                              | 615.10                                           |
| Crystal system                                   | Monoclinic                                        | Triclinic                                           | Monoclinic                                          | Monoclinic                                       |
| Space group                                      | Pn                                                | P-1                                                 | P2 <sub>1</sub> /n                                  | C2/c                                             |
| a/ Å                                             | 6.029(4)                                          | 9.544(8)                                            | 9.2915(12)                                          | 10.247(13)                                       |
| b/ Å                                             | 15.799(11)                                        | 12.116(10)                                          | 32.458(4)                                           | 33.06(5)                                         |
| c/ Å                                             | 16.468(11)                                        | 14.974(14)                                          | 10.0812(12)                                         | 9.773(12)                                        |
| α(°)                                             | 90                                                | 93.98(6)                                            | 90                                                  | 90                                               |
| β(°)                                             | 91.653(14)                                        | 99.20(8)                                            | 100.874(5)                                          | 104.16(6)                                        |
| γ(°)                                             | 90                                                | 104.84(3)                                           | 90                                                  | 90                                               |
| Volume (Å <sup>3</sup> )                         | 1568.0(19)                                        | 1641(3)                                             | 2985.7(6)                                           | 3210(7)                                          |
| Z                                                | 2                                                 | 2                                                   | 4                                                   | 4                                                |
| Dc (Mg/m <sup>3</sup> )                          | 1.363                                             | 1.383                                               | 1.520                                               | 1.273                                            |
| μ (mm <sup>-1</sup> )                            | 0.088                                             | 0.570                                               | 0.702                                               | 0.718                                            |
| F(000)                                           | 672                                               | 702                                                 | 1408                                                | 1252                                             |
| reflns collected                                 | 35261                                             | 55759                                               | 65544                                               | 26202                                            |
| indep. reflns                                    | 7788                                              | 5922                                                | 5245                                                | 2899                                             |
| GOF on F <sup>2</sup>                            | 1.068                                             | 1.073                                               | 1.035                                               | 1.044                                            |
| R1 (on F <sub>o</sub> <sup>2</sup> , I > 2σ(I))  | 0.0488                                            | 0.0696                                              | 0.0616                                              | 0.0712                                           |
| wR2 (on F <sub>o</sub> <sup>2</sup> , I > 2σ(I)) | 0.1421                                            | 0.1468                                              | 0.1278                                              | 0.1717                                           |
| R1 (all data)                                    | 0.0630                                            | 0.0985                                              | 0.1033                                              | 0.1034                                           |
| wR2 (all data)                                   | 0.1502                                            | 0.1592                                              | 0.1447                                              | 0.1860                                           |



**Table S2:** B3LYP TDDFT-predicted energies and expansion coefficients for compound **1** (only excited states with  $f > 0.05$  and  $\lambda > 270$  nm are listed).

|                  |           |           |           |            |                                 |
|------------------|-----------|-----------|-----------|------------|---------------------------------|
| Excited State 1: | Singlet-A | 2.6712 eV | 464.15 nm | $f=1.0116$ | $\langle S^{**2} \rangle=0.000$ |
| 74 -> 75         | 0.70474   |           |           |            |                                 |
| Excited State 4: | Singlet-A | 4.0381 eV | 307.04 nm | $f=0.1384$ | $\langle S^{**2} \rangle=0.000$ |
| 70 -> 75         | -0.25252  |           |           |            |                                 |
| 71 -> 75         | 0.61284   |           |           |            |                                 |
| 72 -> 75         | -0.18974  |           |           |            |                                 |
| Excited State 6: | Singlet-A | 4.2823 eV | 289.53 nm | $f=0.2697$ | $\langle S^{**2} \rangle=0.000$ |
| 70 -> 75         | 0.55479   |           |           |            |                                 |
| 71 -> 75         | 0.23869   |           |           |            |                                 |
| 72 -> 75         | -0.10676  |           |           |            |                                 |
| 74 -> 76         | 0.30876   |           |           |            |                                 |

**Table S3:** B3LYP TDDFT-predicted energies and expansion coefficients for compound **Co(Hlp)(DMF)** (only excited states with  $f > 0.05$  and  $\lambda > 270$  nm are listed).

|                   |         |           |           |            |                                  |
|-------------------|---------|-----------|-----------|------------|----------------------------------|
| Excited State 8:  | 2.194-A | 1.7000 eV | 729.30 nm | $f=0.2288$ | $\langle S^{*2} \rangle = 0.953$ |
| 174A ->177A       |         |           |           |            | -0.17222                         |
| 175A ->177A       |         |           |           |            | -0.33733                         |
| 176A ->177A       |         |           |           |            | 0.64404                          |
| 172B ->176B       |         |           |           |            | 0.13197                          |
| 174B ->176B       |         |           |           |            | 0.13009                          |
| 175B ->176B       |         |           |           |            | 0.61504                          |
| Excited State 9:  | 2.220-A | 1.8012 eV | 688.33 nm | $f=0.0879$ | $\langle S^{*2} \rangle = 0.982$ |
| 175A ->177A       |         |           |           |            | 0.80712                          |
| 176A ->177A       |         |           |           |            | 0.23508                          |
| 172B ->176B       |         |           |           |            | -0.12427                         |
| 174B ->176B       |         |           |           |            | 0.43928                          |
| 175B ->176B       |         |           |           |            | 0.18336                          |
| Excited State 14: | 2.658-A | 2.2586 eV | 548.95 nm | $f=0.1332$ | $\langle S^{*2} \rangle = 1.517$ |
| 171A ->177A       |         |           |           |            | -0.11167                         |
| 171A ->179A       |         |           |           |            | -0.10409                         |
| 172A ->177A       |         |           |           |            | -0.11469                         |
| 174A ->177A       |         |           |           |            | 0.39380                          |
| 171B ->176B       |         |           |           |            | 0.52219                          |
| 172B ->176B       |         |           |           |            | -0.19589                         |
| 173B ->176B       |         |           |           |            | 0.55545                          |
| 174B ->177B       |         |           |           |            | 0.14854                          |
| 175B ->177B       |         |           |           |            | 0.10912                          |
| Excited State 16: | 2.660-A | 2.3173 eV | 535.04 nm | $f=0.1716$ | $\langle S^{*2} \rangle = 1.519$ |
| 160A ->179A       |         |           |           |            | -0.10573                         |
| 163A ->179A       |         |           |           |            | -0.15844                         |
| 170A ->177A       |         |           |           |            | 0.11886                          |
| 171A ->177A       |         |           |           |            | 0.10650                          |
| 172A ->177A       |         |           |           |            | 0.31153                          |
| 172A ->179A       |         |           |           |            | 0.11886                          |
| 174A ->177A       |         |           |           |            | 0.46491                          |
| 174A ->179A       |         |           |           |            | 0.10123                          |
| 175A ->179A       |         |           |           |            | 0.14481                          |
| 176A ->178A       |         |           |           |            | 0.27563                          |
| 168B ->182B       |         |           |           |            | 0.13293                          |
| 169B ->182B       |         |           |           |            | -0.12561                         |
| 171B ->176B       |         |           |           |            | -0.40394                         |
| 173B ->176B       |         |           |           |            | 0.27263                          |
| 174B ->177B       |         |           |           |            | -0.10500                         |
| 174B ->182B       |         |           |           |            | 0.18920                          |
| 175B ->177B       |         |           |           |            | -0.13315                         |
| Excited State 26: | 2.706-A | 2.8334 eV | 437.59 nm | $f=0.4269$ | $\langle S^{*2} \rangle = 1.581$ |
| 167A ->177A       |         |           |           |            | 0.12361                          |
| 168A ->177A       |         |           |           |            | 0.36809                          |

|                   |          |           |           |          |              |
|-------------------|----------|-----------|-----------|----------|--------------|
| 169A ->177A       | 0.12688  |           |           |          |              |
| 176A ->178A       | 0.42458  |           |           |          |              |
| 167B ->176B       | -0.36401 |           |           |          |              |
| 173B ->177B       | 0.13333  |           |           |          |              |
| 174B ->177B       | 0.23291  |           |           |          |              |
| 175B ->177B       | 0.56768  |           |           |          |              |
| Excited State 27: | 2.885-A  | 2.8388 eV | 436.75 nm | f=0.3779 | <S**2>=1.830 |
| 168A ->177A       | -0.40696 |           |           |          |              |
| 168A ->178A       | 0.10612  |           |           |          |              |
| 169A ->177A       | -0.15430 |           |           |          |              |
| 170A ->177A       | -0.17014 |           |           |          |              |
| 172A ->177A       | 0.13482  |           |           |          |              |
| 175A ->178A       | -0.13813 |           |           |          |              |
| 176A ->178A       | 0.52922  |           |           |          |              |
| 167B ->176B       | 0.44310  |           |           |          |              |
| 168B ->176B       | 0.10550  |           |           |          |              |
| 170B ->176B       | -0.14133 |           |           |          |              |
| 173B ->177B       | -0.10649 |           |           |          |              |
| 174B ->177B       | 0.11738  |           |           |          |              |
| 175B ->177B       | 0.29171  |           |           |          |              |
| Excited State 37: | 2.503-A  | 3.2642 eV | 379.83 nm | f=0.1907 | <S**2>=1.317 |
| 162A ->177A       | -0.12341 |           |           |          |              |
| 163A ->177A       | 0.24806  |           |           |          |              |
| 164A ->177A       | -0.11639 |           |           |          |              |
| 166A ->177A       | -0.44683 |           |           |          |              |
| 167A ->177A       | 0.13326  |           |           |          |              |
| 168A ->177A       | 0.43942  |           |           |          |              |
| 165B ->176B       | 0.33908  |           |           |          |              |
| 167B ->176B       | 0.48874  |           |           |          |              |
| 168B ->176B       | -0.22180 |           |           |          |              |
| 172B ->177B       | -0.11037 |           |           |          |              |
| Excited State 38: | 2.458-A  | 3.2833 eV | 377.62 nm | f=0.1750 | <S**2>=1.261 |
| 163A ->177A       | -0.19060 |           |           |          |              |
| 165A ->177A       | 0.14942  |           |           |          |              |
| 166A ->177A       | 0.57544  |           |           |          |              |
| 167A ->177A       | 0.19208  |           |           |          |              |
| 168A ->177A       | 0.34775  |           |           |          |              |
| 174A ->178A       | 0.15770  |           |           |          |              |
| 164B ->176B       | -0.21698 |           |           |          |              |
| 165B ->176B       | -0.14622 |           |           |          |              |
| 166B ->176B       | 0.23291  |           |           |          |              |
| 167B ->176B       | 0.36577  |           |           |          |              |
| 173B ->177B       | 0.26231  |           |           |          |              |
| Excited State 41: | 2.227-A  | 3.3548 eV | 369.57 nm | f=0.2903 | <S**2>=0.990 |
| 163A ->177A       | 0.19736  |           |           |          |              |
| 167A ->177A       | -0.33982 |           |           |          |              |

|                           |                                           |
|---------------------------|-------------------------------------------|
| 169A ->177A               | -0.10545                                  |
| 174A ->178A               | 0.49214                                   |
| 176A ->179A               | -0.13906                                  |
| 162B ->176B               | 0.13338                                   |
| 163B ->176B               | -0.13933                                  |
| 166B ->176B               | -0.40410                                  |
| 171B ->177B               | 0.10841                                   |
| 172B ->177B               | -0.13141                                  |
| 173B ->177B               | 0.51985                                   |
| Excited State 42: 2.109-A | 3.3878 eV 365.97 nm f=0.0591 <S**2>=0.862 |
| 163A ->177A               | 0.12885                                   |
| 164A ->177A               | -0.11106                                  |
| 166A ->177A               | -0.12770                                  |
| 167A ->177A               | 0.51117                                   |
| 168A ->177A               | -0.29799                                  |
| 173A ->178A               | 0.10002                                   |
| 174A ->178A               | 0.29162                                   |
| 166B ->176B               | 0.50657                                   |
| 167B ->176B               | -0.27215                                  |
| 169B ->176B               | -0.10016                                  |
| 172B ->177B               | -0.11187                                  |
| 173B ->177B               | 0.29848                                   |
| Excited State 63: 2.953-A | 3.9103 eV 317.07 nm f=0.0558 <S**2>=1.930 |
| 159A ->177A               | 0.16866                                   |
| 171A ->178A               | 0.11551                                   |
| 172A ->178A               | -0.12477                                  |
| 174A ->182A               | 0.13516                                   |
| 176A ->183A               | 0.11840                                   |
| 158B ->176B               | -0.20159                                  |
| 168B ->177B               | -0.29644                                  |
| 169B ->177B               | 0.45327                                   |
| 170B ->177B               | 0.50137                                   |
| 171B ->177B               | -0.19939                                  |
| 173B ->181B               | -0.13810                                  |
| 174B ->178B               | 0.13273                                   |
| 175B ->179B               | -0.13533                                  |
| 175B ->183B               | -0.13436                                  |
| Excited State 83: 2.332-A | 4.2591 eV 291.11 nm f=0.0561 <S**2>=1.110 |
| 159A ->177A               | 0.10893                                   |
| 176A ->182A               | 0.58260                                   |
| 166B ->177B               | 0.12760                                   |
| 167B ->177B               | -0.15352                                  |
| 168B ->177B               | 0.22248                                   |
| 172B ->179B               | -0.10376                                  |
| 174B ->181B               | -0.18835                                  |
| 175B ->181B               | 0.60351                                   |

|                   |          |           |           |          |              |
|-------------------|----------|-----------|-----------|----------|--------------|
| 175B ->182B       | -0.12109 |           |           |          |              |
| Excited State 87: | 2.283-A  | 4.3341 eV | 286.06 nm | f=0.0745 | <S**2>=1.053 |
| 159A ->177A       | -0.25182 |           |           |          |              |
| 166A ->178A       | -0.10592 |           |           |          |              |
| 167A ->178A       | -0.11184 |           |           |          |              |
| 168A ->178A       | 0.56602  |           |           |          |              |
| 174A ->180A       | -0.16208 |           |           |          |              |
| 158B ->176B       | -0.24606 |           |           |          |              |
| 166B ->177B       | -0.12279 |           |           |          |              |
| 167B ->177B       | 0.52553  |           |           |          |              |
| 168B ->177B       | -0.15095 |           |           |          |              |
| 174B ->181B       | -0.11157 |           |           |          |              |
| 175B ->181B       | 0.19284  |           |           |          |              |
| Excited State 94: | 2.608-A  | 4.4335 eV | 279.66 nm | f=0.0575 | <S**2>=1.451 |
| 158A ->177A       | -0.17374 |           |           |          |              |
| 159A ->177A       | 0.17184  |           |           |          |              |
| 163A ->178A       | -0.24027 |           |           |          |              |
| 167A ->178A       | 0.21127  |           |           |          |              |
| 169A ->178A       | 0.13100  |           |           |          |              |
| 170A ->180A       | 0.10263  |           |           |          |              |
| 171A ->180A       | 0.10954  |           |           |          |              |
| 173A ->180A       | 0.10780  |           |           |          |              |
| 174A ->180A       | -0.28911 |           |           |          |              |
| 175A ->182A       | -0.15806 |           |           |          |              |
| 158B ->176B       | 0.14938  |           |           |          |              |
| 164B ->177B       | 0.13831  |           |           |          |              |
| 165B ->177B       | 0.10082  |           |           |          |              |
| 167B ->177B       | 0.13371  |           |           |          |              |
| 171B ->178B       | -0.14217 |           |           |          |              |
| 172B ->178B       | 0.29949  |           |           |          |              |
| 172B ->179B       | -0.27634 |           |           |          |              |
| 172B ->180B       | 0.11526  |           |           |          |              |
| 173B ->178B       | -0.13535 |           |           |          |              |
| 173B ->179B       | 0.37912  |           |           |          |              |
| 174B ->181B       | -0.11565 |           |           |          |              |

**Table S4:** B3LYP TDDFT-predicted energies and expansion coefficients for compound **Ni(Hlp)** (only excited states with  $f > 0.05$  and  $\lambda > 270$  nm are listed).

|                   |           |           |           |            |                                   |
|-------------------|-----------|-----------|-----------|------------|-----------------------------------|
| Excited State 1:  | Singlet-A | 1.7313 eV | 716.13 nm | $f=0.2744$ | $\langle S^{**2} \rangle = 0.000$ |
| 156 ->157         | 0.69899   |           |           |            |                                   |
| Excited State 6:  | Singlet-A | 2.3380 eV | 530.30 nm | $f=0.4833$ | $\langle S^{**2} \rangle = 0.000$ |
| 154 ->157         | 0.69191   |           |           |            |                                   |
| Excited State 10: | Singlet-A | 2.7492 eV | 450.98 nm | $f=0.1787$ | $\langle S^{**2} \rangle = 0.000$ |
| 140 ->159         | -0.17564  |           |           |            |                                   |
| 142 ->159         | 0.10677   |           |           |            |                                   |
| 153 ->159         | 0.10900   |           |           |            |                                   |
| 156 ->158         | 0.47398   |           |           |            |                                   |
| 156 ->159         | 0.39551   |           |           |            |                                   |
| Excited State 12: | Singlet-A | 2.8937 eV | 428.47 nm | $f=0.5544$ | $\langle S^{**2} \rangle = 0.000$ |
| 151 ->157         | -0.14449  |           |           |            |                                   |
| 156 ->158         | -0.47032  |           |           |            |                                   |
| 156 ->159         | 0.47109   |           |           |            |                                   |
| Excited State 15: | Singlet-A | 3.2283 eV | 384.05 nm | $f=0.2304$ | $\langle S^{**2} \rangle = 0.000$ |
| 148 ->157         | 0.23771   |           |           |            |                                   |
| 149 ->157         | 0.46631   |           |           |            |                                   |
| 154 ->158         | 0.28652   |           |           |            |                                   |
| 154 ->159         | 0.25082   |           |           |            |                                   |
| 155 ->159         | -0.21182  |           |           |            |                                   |
| Excited State 16: | Singlet-A | 3.2488 eV | 381.63 nm | $f=0.3716$ | $\langle S^{**2} \rangle = 0.000$ |
| 148 ->157         | 0.27287   |           |           |            |                                   |
| 149 ->157         | 0.34663   |           |           |            |                                   |
| 154 ->158         | -0.25597  |           |           |            |                                   |
| 154 ->159         | -0.32149  |           |           |            |                                   |
| 155 ->159         | 0.28752   |           |           |            |                                   |
| Excited State 19: | Singlet-A | 3.4308 eV | 361.38 nm | $f=0.2873$ | $\langle S^{**2} \rangle = 0.000$ |
| 147 ->157         | -0.14458  |           |           |            |                                   |
| 150 ->159         | 0.11390   |           |           |            |                                   |
| 151 ->159         | -0.11264  |           |           |            |                                   |
| 154 ->158         | 0.54875   |           |           |            |                                   |
| 154 ->159         | -0.18777  |           |           |            |                                   |
| 155 ->159         | 0.23830   |           |           |            |                                   |
| Excited State 22: | Singlet-A | 3.5808 eV | 346.25 nm | $f=0.0682$ | $\langle S^{**2} \rangle = 0.000$ |
| 143 ->157         | -0.17739  |           |           |            |                                   |
| 145 ->157         | 0.35465   |           |           |            |                                   |
| 146 ->157         | -0.35288  |           |           |            |                                   |
| 147 ->157         | 0.41542   |           |           |            |                                   |
| 154 ->158         | 0.13679   |           |           |            |                                   |
| 154 ->159         | -0.10118  |           |           |            |                                   |
| Excited State 27: | Singlet-A | 3.8985 eV | 318.03 nm | $f=0.1182$ | $\langle S^{**2} \rangle = 0.000$ |
| 156 ->160         | 0.68213   |           |           |            |                                   |
| Excited State 36: | Singlet-A | 4.3465 eV | 285.25 nm | $f=0.0737$ | $\langle S^{**2} \rangle = 0.000$ |

|                   |           |           |           |          |              |
|-------------------|-----------|-----------|-----------|----------|--------------|
| 141 ->157         | -0.19383  |           |           |          |              |
| 144 ->159         | 0.12165   |           |           |          |              |
| 145 ->159         | 0.11674   |           |           |          |              |
| 148 ->158         | -0.15397  |           |           |          |              |
| 149 ->158         | 0.31245   |           |           |          |              |
| 149 ->159         | -0.20725  |           |           |          |              |
| 150 ->159         | -0.10133  |           |           |          |              |
| 151 ->159         | -0.10990  |           |           |          |              |
| 156 ->162         | 0.44807   |           |           |          |              |
| Excited State 37: | Singlet-A | 4.3831 eV | 282.87 nm | f=0.1011 | <S**2>=0.000 |
| 140 ->157         | 0.18691   |           |           |          |              |
| 141 ->157         | 0.32677   |           |           |          |              |
| 142 ->157         | 0.14183   |           |           |          |              |
| 143 ->157         | -0.11790  |           |           |          |              |
| 145 ->159         | 0.14377   |           |           |          |              |
| 148 ->158         | 0.27107   |           |           |          |              |
| 149 ->158         | 0.29691   |           |           |          |              |
| 154 ->160         | -0.20511  |           |           |          |              |
| 156 ->161         | -0.10005  |           |           |          |              |
| Excited State 43: | Singlet-A | 4.5534 eV | 272.29 nm | f=0.0716 | <S**2>=0.000 |
| 140 ->157         | 0.30282   |           |           |          |              |
| 141 ->157         | -0.12669  |           |           |          |              |
| 144 ->159         | 0.15326   |           |           |          |              |
| 147 ->158         | -0.10492  |           |           |          |              |
| 149 ->159         | 0.24757   |           |           |          |              |
| 155 ->162         | 0.46583   |           |           |          |              |

**Table S5:** B3LYP TDDFT-predicted energies and expansion coefficients for compound **Cu(Hlp)** (only excited states with  $f > 0.05$  and  $\lambda > 270$  nm are listed).

|                   |          |           |           |            |                                   |
|-------------------|----------|-----------|-----------|------------|-----------------------------------|
| Excited State 2:  | 2.020-A  | 1.6990 eV | 729.73 nm | $f=0.0536$ | $\langle S^{**2} \rangle = 0.770$ |
| 157A ->158A       | 0.30404  |           |           |            |                                   |
| 121B ->158B       | 0.11636  |           |           |            |                                   |
| 135B ->158B       | 0.18844  |           |           |            |                                   |
| 141B ->158B       | -0.13058 |           |           |            |                                   |
| 143B ->158B       | 0.12191  |           |           |            |                                   |
| 145B ->158B       | -0.16166 |           |           |            |                                   |
| 150B ->158B       | 0.15470  |           |           |            |                                   |
| 151B ->158B       | 0.11593  |           |           |            |                                   |
| 154B ->158B       | -0.22729 |           |           |            |                                   |
| 155B ->158B       | -0.45105 |           |           |            |                                   |
| 156B ->157B       | 0.32920  |           |           |            |                                   |
| 156B ->158B       | 0.59313  |           |           |            |                                   |
| Excited State 3:  | 2.010-A  | 1.7153 eV | 722.80 nm | $f=0.2565$ | $\langle S^{**2} \rangle = 0.760$ |
| 157A ->158A       | 0.63263  |           |           |            |                                   |
| 155B ->158B       | 0.14722  |           |           |            |                                   |
| 156B ->157B       | 0.61550  |           |           |            |                                   |
| 156B ->158B       | -0.36654 |           |           |            |                                   |
| Excited State 10: | 2.007-A  | 2.3282 eV | 532.52 nm | $f=0.5117$ | $\langle S^{**2} \rangle = 0.757$ |
| 155A ->158A       | 0.66213  |           |           |            |                                   |
| 141B ->158B       | 0.17280  |           |           |            |                                   |
| 142B ->158B       | 0.16104  |           |           |            |                                   |
| 154B ->157B       | 0.66254  |           |           |            |                                   |
| 154B ->158B       | 0.12312  |           |           |            |                                   |
| Excited State 11: | 2.036-A  | 2.3619 eV | 524.94 nm | $f=0.0583$ | $\langle S^{**2} \rangle = 0.786$ |
| 155A ->158A       | -0.20336 |           |           |            |                                   |
| 141B ->158B       | 0.38260  |           |           |            |                                   |
| 142B ->158B       | 0.30984  |           |           |            |                                   |
| 152B ->158B       | -0.13982 |           |           |            |                                   |
| 153B ->158B       | -0.10743 |           |           |            |                                   |
| 154B ->157B       | -0.17559 |           |           |            |                                   |
| 154B ->158B       | 0.65699  |           |           |            |                                   |
| 155B ->158B       | -0.36718 |           |           |            |                                   |
| 156B ->158B       | 0.11721  |           |           |            |                                   |
| Excited State 21: | 2.006-A  | 2.8738 eV | 431.43 nm | $f=0.8339$ | $\langle S^{**2} \rangle = 0.756$ |
| 157A ->159A       | 0.68693  |           |           |            |                                   |
| 156B ->159B       | 0.69214  |           |           |            |                                   |
| Excited State 26: | 2.666-A  | 3.0807 eV | 402.46 nm | $f=0.0533$ | $\langle S^{**2} \rangle = 1.527$ |
| 148A ->158A       | 0.25847  |           |           |            |                                   |
| 149A ->158A       | -0.24058 |           |           |            |                                   |
| 150A ->158A       | 0.35311  |           |           |            |                                   |
| 152A ->158A       | 0.23244  |           |           |            |                                   |
| 155A ->159A       | -0.26147 |           |           |            |                                   |
| 147B ->157B       | 0.11609  |           |           |            |                                   |



|                   |          |           |           |          |              |
|-------------------|----------|-----------|-----------|----------|--------------|
| 148B ->157B       | -0.13886 |           |           |          |              |
| 150B ->157B       | 0.44397  |           |           |          |              |
| 151B ->157B       | 0.34313  |           |           |          |              |
| 152B ->157B       | 0.26415  |           |           |          |              |
| 154B ->157B       | 0.11044  |           |           |          |              |
| 154B ->159B       | 0.32342  |           |           |          |              |
| Excited State 30: | 2.047-A  | 3.2068 eV | 386.63 nm | f=0.5147 | <S**2>=0.797 |
| 149A ->158A       | 0.36847  |           |           |          |              |
| 150A ->158A       | -0.16312 |           |           |          |              |
| 151A ->158A       | 0.46121  |           |           |          |              |
| 152A ->158A       | 0.26985  |           |           |          |              |
| 149B ->157B       | -0.36207 |           |           |          |              |
| 150B ->157B       | -0.39482 |           |           |          |              |
| 151B ->157B       | 0.39652  |           |           |          |              |
| 152B ->157B       | 0.21929  |           |           |          |              |
| 154B ->159B       | 0.11912  |           |           |          |              |
| Excited State 32: | 2.247-A  | 3.2896 eV | 376.89 nm | f=0.0503 | <S**2>=1.012 |
| 147A ->158A       | 0.21085  |           |           |          |              |
| 149A ->158A       | -0.46076 |           |           |          |              |
| 150A ->158A       | -0.35294 |           |           |          |              |
| 151A ->158A       | 0.14999  |           |           |          |              |
| 152A ->158A       | 0.21063  |           |           |          |              |
| 147B ->157B       | -0.20885 |           |           |          |              |
| 148B ->157B       | -0.19976 |           |           |          |              |
| 149B ->157B       | 0.56387  |           |           |          |              |
| 150B ->157B       | -0.25766 |           |           |          |              |
| 151B ->157B       | 0.13511  |           |           |          |              |
| 152B ->157B       | 0.16247  |           |           |          |              |
| Excited State 35: | 2.679-A  | 3.4403 eV | 360.38 nm | f=0.0919 | <S**2>=1.544 |
| 146A ->158A       | -0.34066 |           |           |          |              |
| 148A ->158A       | -0.11672 |           |           |          |              |
| 155A ->159A       | 0.32008  |           |           |          |              |
| 143B ->158B       | 0.14413  |           |           |          |              |
| 145B ->157B       | 0.12176  |           |           |          |              |
| 146B ->157B       | 0.46245  |           |           |          |              |
| 147B ->158B       | -0.12103 |           |           |          |              |
| 151B ->158B       | -0.39710 |           |           |          |              |
| 152B ->158B       | 0.14064  |           |           |          |              |
| 154B ->159B       | 0.45561  |           |           |          |              |
| Excited State 36: | 2.956-A  | 3.4450 eV | 359.90 nm | f=0.0961 | <S**2>=1.935 |
| 146A ->158A       | 0.53937  |           |           |          |              |
| 148A ->158A       | -0.11340 |           |           |          |              |
| 155A ->159A       | 0.43193  |           |           |          |              |
| 145B ->157B       | -0.12346 |           |           |          |              |
| 146B ->157B       | -0.46206 |           |           |          |              |
| 148B ->157B       | -0.11950 |           |           |          |              |

|                   |          |           |                                 |
|-------------------|----------|-----------|---------------------------------|
| 151B ->158B       | -0.21521 |           |                                 |
| 154B ->159B       | 0.31462  |           |                                 |
| Excited State 37: | 2.065-A  | 3.4558 eV | 358.77 nm f=0.1561 <S**2>=0.816 |
| 148A ->158A       | -0.21066 |           |                                 |
| 155A ->159A       | 0.34685  |           |                                 |
| 143B ->158B       | -0.18218 |           |                                 |
| 145B ->158B       | 0.15098  |           |                                 |
| 146B ->157B       | 0.15602  |           |                                 |
| 146B ->158B       | -0.11181 |           |                                 |
| 147B ->157B       | 0.14146  |           |                                 |
| 147B ->158B       | 0.16456  |           |                                 |
| 148B ->157B       | -0.17564 |           |                                 |
| 151B ->158B       | 0.64412  |           |                                 |
| 152B ->158B       | -0.20324 |           |                                 |
| 154B ->159B       | 0.33435  |           |                                 |
| Excited State 38: | 2.014-A  | 3.5478 eV | 349.47 nm f=0.1220 <S**2>=0.764 |
| 146A ->158A       | -0.12457 |           |                                 |
| 148A ->158A       | 0.60854  |           |                                 |
| 155A ->159A       | 0.24825  |           |                                 |
| 146B ->157B       | -0.12527 |           |                                 |
| 147B ->157B       | -0.46596 |           |                                 |
| 148B ->157B       | 0.41151  |           |                                 |
| 150B ->158B       | -0.11939 |           |                                 |
| 151B ->158B       | 0.12732  |           |                                 |
| 154B ->159B       | 0.25458  |           |                                 |
| Excited State 52: | 2.094-A  | 3.9233 eV | 316.02 nm f=0.1279 <S**2>=0.846 |
| 157A ->160A       | 0.60793  |           |                                 |
| 157A ->161A       | -0.10977 |           |                                 |
| 153B ->159B       | 0.11787  |           |                                 |
| 156B ->160B       | 0.70227  |           |                                 |
| 156B ->161B       | -0.12767 |           |                                 |
| Excited State 66: | 2.035-A  | 4.2615 eV | 290.94 nm f=0.0557 <S**2>=0.785 |
| 144A ->158A       | 0.50810  |           |                                 |
| 146A ->158A       | -0.14282 |           |                                 |
| 149A ->159A       | -0.11761 |           |                                 |
| 150A ->159A       | 0.11448  |           |                                 |
| 151A ->159A       | 0.37529  |           |                                 |
| 144B ->157B       | 0.51935  |           |                                 |
| 145B ->158B       | -0.17159 |           |                                 |
| 146B ->157B       | -0.11704 |           |                                 |
| 151B ->159B       | 0.38763  |           |                                 |
| Excited State 71: | 2.180-A  | 4.3684 eV | 283.82 nm f=0.0546 <S**2>=0.938 |
| 144A ->158A       | -0.26964 |           |                                 |
| 146A ->158A       | 0.10371  |           |                                 |
| 149A ->159A       | -0.18072 |           |                                 |
| 151A ->159A       | 0.38675  |           |                                 |

|                   |          |                                           |
|-------------------|----------|-------------------------------------------|
| 152A ->159A       | 0.17440  |                                           |
| 157A ->162A       | 0.22393  |                                           |
| 143B ->157B       | -0.22552 |                                           |
| 144B ->157B       | -0.31144 |                                           |
| 145B ->158B       | 0.10274  |                                           |
| 149B ->159B       | 0.11828  |                                           |
| 150B ->159B       | -0.13718 |                                           |
| 151B ->159B       | 0.42662  |                                           |
| 152B ->159B       | 0.17006  |                                           |
| 154B ->160B       | 0.13066  |                                           |
| 156B ->162B       | 0.33541  |                                           |
| Excited State 72: | 2.032-A  | 4.3744 eV 283.43 nm f=0.2069 <S**2>=0.782 |
| 149A ->159A       | -0.13332 |                                           |
| 150A ->159A       | 0.34236  |                                           |
| 151A ->159A       | -0.23636 |                                           |
| 152A ->159A       | -0.15875 |                                           |
| 155A ->160A       | -0.14402 |                                           |
| 157A ->162A       | 0.46007  |                                           |
| 150B ->159B       | 0.41346  |                                           |
| 151B ->159B       | -0.16510 |                                           |
| 152B ->159B       | -0.10841 |                                           |
| 156B ->162B       | 0.53280  |                                           |

**Table S6:** B3LYP DFT optimized geometry of compound **1**.

| Center<br>Number | Atomic<br>Number | Atomic<br>Type | Coordinates (Angstroms) |           |           |
|------------------|------------------|----------------|-------------------------|-----------|-----------|
|                  |                  |                | X                       | Y         | Z         |
| 1                | 6                | 0              | -2.134773               | -1.884679 | -0.000365 |
| 2                | 6                | 0              | -3.239739               | -0.911269 | -0.000186 |
| 3                | 6                | 0              | -4.619811               | -1.052907 | -0.000079 |
| 4                | 1                | 0              | -5.097350               | -2.026905 | -0.000113 |
| 5                | 6                | 0              | -5.395041               | 0.110072  | 0.000210  |
| 6                | 1                | 0              | -6.476588               | 0.034774  | 0.000295  |
| 7                | 6                | 0              | -4.788176               | 1.367282  | 0.000354  |
| 8                | 1                | 0              | -5.407225               | 2.257699  | 0.000652  |
| 9                | 6                | 0              | -3.395882               | 1.505624  | 0.000255  |
| 10               | 1                | 0              | -2.953793               | 2.492506  | 0.000466  |
| 11               | 6                | 0              | -2.618472               | 0.351218  | -0.000032 |
| 12               | 6                | 0              | -1.160242               | 0.073573  | 0.000017  |
| 13               | 6                | 0              | -0.113130               | 0.970766  | 0.000121  |
| 14               | 6                | 0              | -0.359645               | 2.371745  | 0.000128  |
| 15               | 6                | 0              | 1.294873                | 0.593058  | 0.000076  |
| 16               | 6                | 0              | 3.101261                | -0.685176 | 0.000377  |
| 17               | 6                | 0              | 4.068611                | -1.691551 | 0.000887  |
| 18               | 1                | 0              | 3.798865                | -2.741968 | 0.001603  |
| 19               | 6                | 0              | 5.398022                | -1.284396 | 0.000477  |
| 20               | 1                | 0              | 6.182025                | -2.034365 | 0.000817  |
| 21               | 6                | 0              | 5.752337                | 0.080757  | -0.000374 |
| 22               | 1                | 0              | 6.802815                | 0.352324  | -0.000657 |
| 23               | 6                | 0              | 4.787011                | 1.078515  | -0.000804 |
| 24               | 1                | 0              | 5.057920                | 2.128959  | -0.001398 |
| 25               | 6                | 0              | 3.438944                | 0.692955  | -0.000429 |
| 26               | 7                | 0              | -2.283609               | -3.205585 | -0.000567 |
| 27               | 1                | 0              | -1.473721               | -3.806445 | -0.001346 |
| 28               | 1                | 0              | -3.191233               | -3.640373 | -0.001242 |
| 29               | 7                | 0              | -0.948331               | -1.293185 | -0.000294 |
| 30               | 7                | 0              | 1.725711                | -0.709616 | 0.001035  |
| 31               | 1                | 0              | 1.080753                | -1.493031 | 0.000261  |
| 32               | 7                | 0              | 2.294218                | 1.463436  | -0.000690 |
| 33               | 7                | 0              | -0.562184               | 3.511137  | 0.000067  |

$E_h = -928.243238$  Hartree

**Table S7:** B3LYP DFT optimized geometry of compound **Co(Hlp)(DMF)**.

| Center<br>Number | Atomic<br>Number | Atomic<br>Type | Coordinates (Angstroms) |           |           |
|------------------|------------------|----------------|-------------------------|-----------|-----------|
|                  |                  |                | X                       | Y         | Z         |
| 1                | 6                | 0              | 2.352835                | -1.502719 | -1.747728 |
| 2                | 6                | 0              | 3.202374                | -0.469143 | -2.174027 |
| 3                | 1                | 0              | 2.958263                | 0.571341  | -1.999612 |
| 4                | 6                | 0              | 4.362267                | -0.818679 | -2.848731 |
| 5                | 1                | 0              | 5.031139                | -0.036399 | -3.193557 |
| 6                | 6                | 0              | 4.693286                | -2.169307 | -3.108664 |
| 7                | 1                | 0              | 5.612539                | -2.395648 | -3.639537 |
| 8                | 6                | 0              | 3.856490                | -3.198029 | -2.712008 |
| 9                | 1                | 0              | 4.092841                | -4.235980 | -2.924288 |
| 10               | 6                | 0              | 2.670471                | -2.865030 | -2.032766 |
| 11               | 6                | 0              | 0.780713                | -2.814408 | -1.057403 |
| 12               | 6                | 0              | -0.529161               | -3.258525 | -0.629512 |
| 13               | 6                | 0              | -0.678415               | -4.668793 | -0.483963 |
| 14               | 6                | 0              | -1.616669               | -2.431860 | -0.475913 |
| 15               | 6                | 0              | -3.022098               | -2.796202 | -0.236065 |
| 16               | 6                | 0              | -3.700816               | -3.997683 | -0.021890 |
| 17               | 1                | 0              | -3.186854               | -4.947753 | 0.021981  |
| 18               | 6                | 0              | -5.086230               | -3.952455 | 0.144932  |
| 19               | 1                | 0              | -5.626199               | -4.877149 | 0.317751  |
| 20               | 6                | 0              | -5.792255               | -2.744317 | 0.093537  |
| 21               | 1                | 0              | -6.868809               | -2.746715 | 0.224004  |
| 22               | 6                | 0              | -5.120976               | -1.542330 | -0.123090 |
| 23               | 1                | 0              | -5.651207               | -0.598052 | -0.167649 |
| 24               | 6                | 0              | -3.740720               | -1.589995 | -0.279816 |
| 25               | 6                | 0              | -2.766671               | -0.526669 | -0.501110 |
| 26               | 6                | 0              | -2.262770               | 1.735797  | -0.634238 |
| 27               | 6                | 0              | -2.649397               | 3.111964  | -0.951631 |
| 28               | 6                | 0              | -3.884998               | 3.659724  | -1.265447 |
| 29               | 1                | 0              | -4.774783               | 3.041803  | -1.294943 |
| 30               | 6                | 0              | -3.938025               | 5.026964  | -1.541302 |
| 31               | 1                | 0              | -4.885883               | 5.490256  | -1.791761 |
| 32               | 6                | 0              | -2.777962               | 5.806583  | -1.499768 |
| 33               | 1                | 0              | -2.839727               | 6.866554  | -1.719989 |
| 34               | 6                | 0              | -1.536239               | 5.250232  | -1.180184 |
| 35               | 1                | 0              | -0.658337               | 5.880726  | -1.157157 |
| 36               | 6                | 0              | -1.481002               | 3.884811  | -0.903706 |
| 37               | 6                | 0              | -0.402359               | 2.951660  | -0.521597 |
| 38               | 6                | 0              | 0.926960                | 3.254453  | -0.296679 |
| 39               | 6                | 0              | 1.420327                | 4.574456  | -0.463867 |
| 40               | 6                | 0              | 1.874168                | 2.290097  | 0.211313  |
| 41               | 6                | 0              | 3.673781                | 1.522824  | 1.268978  |

|    |    |   |           |           |           |
|----|----|---|-----------|-----------|-----------|
| 42 | 6  | 0 | 4.875345  | 1.339901  | 1.953537  |
| 43 | 1  | 0 | 5.541758  | 2.169346  | 2.160113  |
| 44 | 6  | 0 | 5.168262  | 0.046962  | 2.364437  |
| 45 | 1  | 0 | 6.089272  | -0.143803 | 2.904189  |
| 46 | 6  | 0 | 4.286798  | -1.020503 | 2.102975  |
| 47 | 1  | 0 | 4.544952  | -2.014650 | 2.451254  |
| 48 | 6  | 0 | 3.095857  | -0.832533 | 1.415686  |
| 49 | 1  | 0 | 2.419194  | -1.653419 | 1.227367  |
| 50 | 6  | 0 | 2.790609  | 0.462482  | 0.982695  |
| 51 | 6  | 0 | -0.473186 | 0.138391  | 2.747668  |
| 52 | 1  | 0 | -0.602445 | 1.208979  | 2.543765  |
| 53 | 6  | 0 | -1.020717 | 0.805790  | 5.029406  |
| 54 | 1  | 0 | -0.263575 | 0.835532  | 5.817004  |
| 55 | 1  | 0 | -1.986513 | 0.567484  | 5.482025  |
| 56 | 1  | 0 | -1.083574 | 1.789628  | 4.566278  |
| 57 | 6  | 0 | -0.544635 | -1.573907 | 4.483204  |
| 58 | 1  | 0 | -0.279984 | -2.203849 | 3.638780  |
| 59 | 1  | 0 | -1.491074 | -1.915685 | 4.909931  |
| 60 | 1  | 0 | 0.231260  | -1.647093 | 5.249402  |
| 61 | 27 | 0 | 0.104409  | -0.007964 | -0.337586 |
| 62 | 7  | 0 | 1.144700  | -1.498549 | -1.081578 |
| 63 | 7  | 0 | -1.529821 | -1.041716 | -0.607961 |
| 64 | 7  | 0 | -3.135265 | 0.753797  | -0.607519 |
| 65 | 7  | 0 | -0.922967 | 1.680549  | -0.377436 |
| 66 | 7  | 0 | 1.690491  | 0.971825  | 0.289073  |
| 67 | 7  | 0 | 1.666532  | -3.674368 | -1.580427 |
| 68 | 7  | 0 | 3.070386  | 2.653514  | 0.758050  |
| 69 | 1  | 0 | 3.406452  | 3.600902  | 0.847815  |
| 70 | 7  | 0 | -0.796576 | -5.811168 | -0.347278 |
| 71 | 7  | 0 | 1.884344  | 5.629034  | -0.579835 |
| 72 | 7  | 0 | -0.670185 | -0.194154 | 4.028594  |
| 73 | 8  | 0 | -0.173834 | -0.651587 | 1.842789  |

-----  
 $E_h = -3430.522905$  Hartree

**Table S8:** B3LYP DFT optimized geometry of compound **Ni(Hlp)**.

| Center<br>Number | Atomic<br>Number | Atomic<br>Type | Coordinates (Angstroms) |           |           |
|------------------|------------------|----------------|-------------------------|-----------|-----------|
|                  |                  |                | X                       | Y         | Z         |
| 1                | 6                | 0              | -2.529393               | 0.756656  | 1.427556  |
| 2                | 6                | 0              | -2.995174               | -0.475977 | 1.909270  |
| 3                | 1                | 0              | -2.434981               | -1.390842 | 1.761019  |
| 4                | 6                | 0              | -4.195582               | -0.485006 | 2.603080  |
| 5                | 1                | 0              | -4.575749               | -1.424406 | 2.991440  |
| 6                | 6                | 0              | -4.934709               | 0.700127  | 2.827150  |
| 7                | 1                | 0              | -5.869248               | 0.643782  | 3.375892  |
| 8                | 6                | 0              | -4.477736               | 1.924214  | 2.371370  |
| 9                | 1                | 0              | -5.029851               | 2.840684  | 2.552887  |
| 10               | 6                | 0              | -3.259492               | 1.957481  | 1.669462  |
| 11               | 6                | 0              | -1.474331               | 2.477284  | 0.633033  |
| 12               | 6                | 0              | -0.390094               | 3.284024  | 0.121279  |
| 13               | 6                | 0              | -0.681588               | 4.667268  | -0.060671 |
| 14               | 6                | 0              | 0.881049                | 2.809226  | -0.087689 |
| 15               | 6                | 0              | 2.102270                | 3.553863  | -0.423393 |
| 16               | 6                | 0              | 2.381855                | 4.890978  | -0.712022 |
| 17               | 1                | 0              | 1.607962                | 5.644980  | -0.748779 |
| 18               | 6                | 0              | 3.708034                | 5.246125  | -0.963969 |
| 19               | 1                | 0              | 3.941112                | 6.279983  | -1.194327 |
| 20               | 6                | 0              | 4.741620                | 4.301757  | -0.925699 |
| 21               | 1                | 0              | 5.760668                | 4.614765  | -1.123930 |
| 22               | 6                | 0              | 4.469117                | 2.966410  | -0.636576 |
| 23               | 1                | 0              | 5.256222                | 2.222313  | -0.601651 |
| 24               | 6                | 0              | 3.146207                | 2.614463  | -0.394081 |
| 25               | 6                | 0              | 2.546693                | 1.323735  | -0.084459 |
| 26               | 6                | 0              | 2.714568                | -0.970653 | 0.123587  |
| 27               | 6                | 0              | 3.475215                | -2.187805 | 0.405524  |
| 28               | 6                | 0              | 4.828473                | -2.377862 | 0.644548  |
| 29               | 1                | 0              | 5.517955                | -1.541957 | 0.633374  |
| 30               | 6                | 0              | 5.264437                | -3.678959 | 0.900859  |
| 31               | 1                | 0              | 6.314287                | -3.866584 | 1.096128  |
| 32               | 6                | 0              | 4.359530                | -4.744886 | 0.909899  |
| 33               | 1                | 0              | 4.718951                | -5.747214 | 1.114322  |
| 34               | 6                | 0              | 2.998250                | -4.549072 | 0.660469  |
| 35               | 1                | 0              | 2.324029                | -5.394233 | 0.673777  |
| 36               | 6                | 0              | 2.560602                | -3.250562 | 0.406595  |
| 37               | 6                | 0              | 1.251506                | -2.653267 | 0.086229  |
| 38               | 6                | 0              | 0.052939                | -3.304354 | -0.120633 |
| 39               | 6                | 0              | -0.066011               | -4.710290 | 0.029868  |
| 40               | 6                | 0              | -1.109898               | -2.611940 | -0.618579 |
| 41               | 6                | 0              | -3.022947               | -2.286832 | -1.703732 |

|    |    |   |           |           |           |
|----|----|---|-----------|-----------|-----------|
| 42 | 6  | 0 | -4.214289 | -2.393729 | -2.420353 |
| 43 | 1  | 0 | -4.646803 | -3.357852 | -2.660437 |
| 44 | 6  | 0 | -4.809843 | -1.206275 | -2.821728 |
| 45 | 1  | 0 | -5.735410 | -1.239791 | -3.385459 |
| 46 | 6  | 0 | -4.227972 | 0.040952  | -2.523230 |
| 47 | 1  | 0 | -4.714735 | 0.946570  | -2.867732 |
| 48 | 6  | 0 | -3.045228 | 0.141150  | -1.804165 |
| 49 | 1  | 0 | -2.602585 | 1.103661  | -1.588657 |
| 50 | 6  | 0 | -2.440847 | -1.045685 | -1.377028 |
| 51 | 7  | 0 | -1.394712 | 1.116908  | 0.728869  |
| 52 | 7  | 0 | 1.215618  | 1.457663  | 0.079057  |
| 53 | 7  | 0 | 3.276351  | 0.213180  | 0.038013  |
| 54 | 7  | 0 | 1.397712  | -1.284453 | -0.048293 |
| 55 | 7  | 0 | -1.262440 | -1.287044 | -0.665045 |
| 56 | 7  | 0 | -2.577447 | 3.025427  | 1.153850  |
| 57 | 7  | 0 | -2.165359 | -3.244369 | -1.198870 |
| 58 | 1  | 0 | -2.252824 | -4.243426 | -1.315931 |
| 59 | 7  | 0 | -0.920911 | 5.786591  | -0.223364 |
| 60 | 7  | 0 | -0.223541 | -5.852020 | 0.136586  |
| 61 | 28 | 0 | -0.022832 | 0.001822  | 0.034708  |

---

$E_h = -3307.469552$  Hartree



**Table S9:** B3LYP DFT optimized geometry of compound **Ni(Hlp)**.

| Center<br>Number | Atomic<br>Number | Atomic<br>Type | Coordinates (Angstroms) |           |           |
|------------------|------------------|----------------|-------------------------|-----------|-----------|
|                  |                  |                | X                       | Y         | Z         |
| 1                | 6                | 0              | -2.544745               | -1.155169 | 1.380400  |
| 2                | 6                | 0              | -3.180262               | 0.012539  | 1.814051  |
| 3                | 1                | 0              | -2.741417               | 0.986080  | 1.637961  |
| 4                | 6                | 0              | -4.390342               | -0.123632 | 2.479754  |
| 5                | 1                | 0              | -4.905880               | 0.764183  | 2.828708  |
| 6                | 6                | 0              | -4.966113               | -1.387708 | 2.716309  |
| 7                | 1                | 0              | -5.913379               | -1.449059 | 3.240291  |
| 8                | 6                | 0              | -4.342972               | -2.556477 | 2.300219  |
| 9                | 1                | 0              | -4.776501               | -3.531580 | 2.488956  |
| 10               | 6                | 0              | -3.125777               | -2.413438 | 1.634818  |
| 11               | 6                | 0              | -1.172943               | -2.668568 | 0.595576  |
| 12               | 6                | 0              | -0.009960               | -3.351146 | 0.063852  |
| 13               | 6                | 0              | -0.143147               | -4.755012 | -0.101442 |
| 14               | 6                | 0              | 1.197759                | -2.722675 | -0.173393 |
| 15               | 6                | 0              | 2.499374                | -3.343363 | -0.494481 |
| 16               | 6                | 0              | 2.916227                | -4.645617 | -0.762314 |
| 17               | 1                | 0              | 2.226233                | -5.477341 | -0.796610 |
| 18               | 6                | 0              | 4.276588                | -4.864175 | -0.999409 |
| 19               | 1                | 0              | 4.618734                | -5.870038 | -1.215899 |
| 20               | 6                | 0              | 5.201683                | -3.816777 | -0.962167 |
| 21               | 1                | 0              | 6.250139                | -4.021703 | -1.147262 |
| 22               | 6                | 0              | 4.787288                | -2.511685 | -0.689854 |
| 23               | 1                | 0              | 5.492800                | -1.689893 | -0.654880 |
| 24               | 6                | 0              | 3.435108                | -2.297505 | -0.466588 |
| 25               | 6                | 0              | 2.694720                | -1.066752 | -0.173138 |
| 26               | 29               | 0              | -0.068530               | 0.007087  | -0.051070 |
| 27               | 7                | 0              | -1.338274               | -1.349287 | 0.713448  |
| 28               | 7                | 0              | 1.369223                | -1.361250 | -0.046115 |
| 29               | 7                | 0              | 3.288265                | 0.098169  | -0.030047 |
| 30               | 7                | 0              | -2.239715               | -3.337873 | 1.117169  |
| 31               | 1                | 0              | -2.329873               | -4.342137 | 1.170919  |
| 32               | 7                | 0              | -0.311858               | -5.894013 | -0.220775 |
| 33               | 6                | 0              | -2.587191               | 1.030651  | -1.423818 |
| 34               | 6                | 0              | -3.176296               | -0.144953 | -1.911718 |
| 35               | 1                | 0              | -2.687504               | -1.107196 | -1.810974 |
| 36               | 6                | 0              | -4.406493               | -0.033526 | -2.541841 |
| 37               | 1                | 0              | -4.885463               | -0.925425 | -2.932936 |
| 38               | 6                | 0              | -5.053293               | 1.215796  | -2.694654 |
| 39               | 1                | 0              | -6.014998               | 1.253498  | -3.196043 |
| 40               | 6                | 0              | -4.476705               | 2.383763  | -2.226054 |
| 41               | 1                | 0              | -4.962078               | 3.346378  | -2.350692 |

|    |   |   |           |          |           |
|----|---|---|-----------|----------|-----------|
| 42 | 6 | 0 | -3.227826 | 2.293890 | -1.585246 |
| 43 | 6 | 0 | -1.359229 | 2.621357 | -0.611269 |
| 44 | 6 | 0 | -0.220024 | 3.344721 | -0.074816 |
| 45 | 6 | 0 | -0.431705 | 4.742540 | 0.118184  |
| 46 | 6 | 0 | 1.025596  | 2.811093 | 0.164192  |
| 47 | 6 | 0 | 2.285652  | 3.491644 | 0.505746  |
| 48 | 6 | 0 | 2.636725  | 4.808513 | 0.807721  |
| 49 | 1 | 0 | 1.902939  | 5.600939 | 0.856630  |
| 50 | 6 | 0 | 3.980826  | 5.091798 | 1.057489  |
| 51 | 1 | 0 | 4.267928  | 6.109438 | 1.298957  |
| 52 | 6 | 0 | 4.964170  | 4.096308 | 1.002608  |
| 53 | 1 | 0 | 5.998958  | 4.354033 | 1.198853  |
| 54 | 6 | 0 | 4.621519  | 2.780349 | 0.699012  |
| 55 | 1 | 0 | 5.369344  | 1.997453 | 0.649823  |
| 56 | 6 | 0 | 3.281198  | 2.498228 | 0.461233  |
| 57 | 6 | 0 | 2.613209  | 1.241817 | 0.138154  |
| 58 | 7 | 0 | -1.392199 | 1.263438 | -0.780950 |
| 59 | 7 | 0 | 1.292475  | 1.451132 | 0.002953  |
| 60 | 7 | 0 | -2.437130 | 3.278140 | -1.059305 |
| 61 | 7 | 0 | -0.593408 | 5.873812 | 0.293985  |

-----  
E<sub>h</sub> = -3439.636473 Hartree

**Table S10:** Major TDDFT-predicted excited state contributions for **Ni, Cu, Co\_3TA, Co\_1TA\_OptFreqPlus**, and **Co\_1TA\_TD70** using the B3LYP exchange correlation functional.

| Ni                   |                        |                                 |                               |                                                                                              |
|----------------------|------------------------|---------------------------------|-------------------------------|----------------------------------------------------------------------------------------------|
| <i>Excited State</i> | <i>Wavelength (nm)</i> | <i>Energy (cm<sup>-1</sup>)</i> | <i>Oscillator Strength, f</i> | <i>% Contributions</i>                                                                       |
| 1                    | 716                    | 13964                           | 0.2744                        | H→L (98%)                                                                                    |
| 4                    | 648                    | 15443                           | 0.0321                        | H-1→L (70%), H-4→L+2 (10%),<br>H-3→L+2 (5%), H-11→L+2 (5%),<br>H-1→L+2 (3%)                  |
| 6                    | 530                    | 18857                           | 0.4833                        | H-2→L (96%)                                                                                  |
| 8                    | 491                    | 20382                           | 0.0282                        | H-3→L (63%), H-4→L (27%), H-5→L (3%)                                                         |
| 10                   | 451                    | 22174                           | 0.1787                        | H→L+1 (45%), H→L+2 (31%),<br>H-16→L+2 (6%), H-3→L+2 (2%),<br>H-14→L+2 (2%)                   |
| 11                   | 442                    | 22636                           | 0.0267                        | H-5→L (71%), H-6→L (16%), H-3→L (5%),<br>H→L+2 (2%)                                          |
| 12                   | 428                    | 23339                           | 0.5544                        | H→L+2 (44%), H→L+1 (44%), H-5→L (4%)                                                         |
| 13                   | 418                    | 23930                           | 0.0318                        | H-6→L (62%), H-5→L (12%), H-4→L (6%),<br>H-1→L+1 (5%), H-7→L (5%), H→L+2 (2%),<br>H→L+1 (2%) |
| 14                   | 409                    | 24462                           | 0.0353                        | H-1→L+1 (84%), H-6→L (7%),<br>H-1→L+2 (5%)                                                   |
| 15                   | 384                    | 26038                           | 0.2304                        | H-7→L (44%), H-2→L+1 (16%),<br>H-2→L+2 (13%), H-8→L (11%),<br>H-1→L+2 (9%)                   |
| 16                   | 382                    | 26203                           | 0.3716                        | H-7→L (24%), H-2→L+2 (21%),<br>H-1→L+2 (17%), H-8→L (15%),<br>H-2→L+1 (13%)                  |
| 17                   | 374                    | 26761                           | 0.0381                        | H-8→L (71%), H-7→L (22%), H-6→L (3%)                                                         |
| 19                   | 361                    | 27671                           | 0.2873                        | H-2→L+1 (60%), H-1→L+2 (11%),<br>H-2→L+2 (7%), H-9→L (4%),<br>H-6→L+2 (3%), H-5→L+2 (3%)     |
| 22                   | 346                    | 28881                           | 0.0682                        | H-9→L (35%), H-11→L (25%),<br>H-10→L (25%), H-13→L (6%),<br>H-2→L+1 (4%), H-2→L+2 (2%)       |
| 23                   | 342                    | 29223                           | 0.0212                        | H-3→L+1 (58%), H-13→L (12%),<br>H-4→L+1 (7%), H-3→L+2 (6%),<br>H-5→L+1 (4%), H-2→L+2 (3%)    |
| 24                   | 338                    | 29550                           | 0.0443                        | H-12→L (43%), H-13→L (22%),<br>H-4→L+1 (17%), H-11→L (9%),<br>H-15→L (3%)                    |
| 25                   | 335                    | 29830                           | 0.0304                        | H-4→L+1 (31%), H-13→L (29%),<br>H-3→L+1 (20%), H-11→L (3%),<br>H-4→L+2 (3%), H-6→L+1 (3%)    |
| 26                   | 332                    | 30129                           | 0.0270                        | H-12→L (47%), H-4→L+1 (23%),                                                                 |

|    |     |       |        |                                                                                                                                              |
|----|-----|-------|--------|----------------------------------------------------------------------------------------------------------------------------------------------|
| 27 | 318 | 31444 | 0.1182 | H-13→L (13%), H-4→L+2 (4%),<br>H-6→L+1 (4%), H-11→L (2%)<br>H→L+3 (93%)                                                                      |
| 28 | 315 | 31793 | 0.0483 | H-5→L+1 (47%), H-3→L+2 (17%),<br>H-6→L+2 (12%), H-4→L+2 (4%),<br>H-6→L+1 (4%), H-3→L+1 (4%),<br>H-5→L+2 (3%)                                 |
| 29 | 309 | 32345 | 0.0436 | H-5→L+1 (35%), H-6→L+1 (22%),<br>H-5→L+2 (19%), H-3→L+2 (13%)                                                                                |
| 32 | 298 | 33549 | 0.0368 | H-1→L+3 (77%), H→L+4 (16%)                                                                                                                   |
| 34 | 293 | 34132 | 0.0380 | H-7→L+1 (38%), H-7→L+2 (22%),<br>H-5→L+2 (10%), H-12→L+2 (6%),<br>H-6→L+2 (6%), H-1→L+3 (3%),<br>H-15→L (3%), H-11→L+2 (2%),<br>H-3→L+2 (2%) |
| 36 | 285 | 35057 | 0.0737 | H→L+5 (40%), H-7→L+1 (20%),<br>H-7→L+2 (9%), H-15→L (8%),<br>H-8→L+1 (5%), H-12→L+2 (3%),<br>H-11→L+2 (3%), H-5→L+2 (2%),<br>H-6→L+2 (2%)    |
| 37 | 283 | 35352 | 0.1011 | H-15→L (21%), H-7→L+1 (18%),<br>H-8→L+1 (15%), H-2→L+3 (8%),<br>H-16→L (7%), H-11→L+2 (4%),<br>H-14→L (4%), H-13→L (3%),<br>H→L+4 (2%)       |
| 41 | 275 | 36308 | 0.0271 | H-2→L+3 (55%), H-16→L (13%),<br>H-9→L+1 (10%), H-8→L+1 (5%),<br>H-1→L+5 (3%), H-1→L+4 (3%),<br>H-7→L+1 (2%)                                  |
| 43 | 272 | 36726 | 0.0716 | H-1→L+5 (43%), H-16→L (18%),<br>H-7→L+2 (12%), H-12→L+2 (5%),<br>H-15→L (3%), H-9→L+1 (2%)                                                   |
| 46 | 269 | 37228 | 0.0719 | H-9→L+1 (33%), H-10→L+1 (18%),<br>H-11→L+2 (8%), H-11→L+1 (6%),<br>H-2→L+3 (5%), H-16→L (4%),<br>H-10→L+2 (3%)                               |
| 48 | 265 | 37685 | 0.0318 | H-11→L+1 (41%), H-8→L+2 (10%),<br>H-10→L+2 (10%), H-13→L+1 (10%),<br>H-9→L+1 (6%), H-10→L+1 (5%),<br>H-11→L+2 (4%), H-12→L+2 (2%)            |
| 49 | 262 | 38111 | 0.1098 | H-9→L+2 (26%), H-3→L+3 (25%),<br>H-13→L+1 (22%), H-10→L+2 (10%),<br>H-11→L+1 (3%), H-8→L+2 (3%),<br>H-11→L+2 (2%)                            |
| 50 | 261 | 38358 | 0.0589 | H-3→L+3 (28%), H-10→L+2 (20%),<br>H-9→L+2 (20%), H-13→L+1 (10%),                                                                             |

|    |     |       |        |                                                                                                                                                                 |
|----|-----|-------|--------|-----------------------------------------------------------------------------------------------------------------------------------------------------------------|
| 51 | 260 | 38459 | 0.1135 | H-11→L+2 (3%), H-12→L+1 (3%),<br>H-5→L+3 (2%)<br>H-3→L+3 (24%), H-13→L+1 (24%),<br>H-10→L+2 (13%), H-9→L+2 (10%),<br>H→L+6 (8%), H-12→L+1 (5%),<br>H-2→L+4 (3%) |
| 52 | 259 | 38586 | 0.0947 | H→L+6 (64%), H-2→L+4 (10%),<br>H-10→L+2 (7%), H-1→L+14 (3%),<br>H-9→L+2 (2%)                                                                                    |
| 53 | 259 | 38645 | 0.0227 | H-9→L+2 (20%), H-2→L+4 (18%),<br>H-13→L+1 (15%), H-11→L+1 (10%),<br>H-11→L+2 (8%), H-10→L+2 (8%),<br>H-3→L+3 (5%), H-4→L+3 (3%),<br>H-2→L+5 (2%)                |
| 55 | 255 | 39152 | 0.0973 | H-4→L+3 (76%), H-6→L+3 (7%),<br>H-2→L+4 (3%), H-10→L+2 (3%)                                                                                                     |
| 56 | 255 | 39259 | 0.1158 | H-2→L+5 (80%), H-3→L+7 (2%)                                                                                                                                     |
| 59 | 248 | 40314 | 0.0475 | H-1→L+6 (71%), H→L+7 (11%),<br>H→L+14 (5%), H-17→L (3%)                                                                                                         |
| 60 | 246 | 40569 | 0.2433 | H-3→L+4 (60%), H-5→L+3 (10%),<br>H-4→L+4 (7%), H-5→L+4 (3%),<br>H-1→L+6 (3%), H-18→L (2%)                                                                       |

### Cu

| <i>Excited State</i> | <i>Wavelength (nm)</i> | <i>Energy (cm<sup>-1</sup>)</i> | <i>Oscillator Strength, f</i> | <i>% Contributions</i>                                                                                                                                                                     |
|----------------------|------------------------|---------------------------------|-------------------------------|--------------------------------------------------------------------------------------------------------------------------------------------------------------------------------------------|
| 2                    | 730                    | 13703                           | 0.0536                        | H(β)→L+1(β) (35%), H-1(β)→L+1(β) (20%),<br>H(β)→L(β) (11%), H(α)→L(α) (9%),<br>H-2(β)→L+1(β) (5%), H-21(β)→L+1(β) (4%),<br>H-11(β)→L+1(β) (3%), H-6(β)→L+1(β) (2%),<br>H-15(β)→L+1(β) (2%) |
| 3                    | 723                    | 13835                           | 0.2565                        | H(α)→L(α) (40%), H(β)→L(β) (38%),<br>H(β)→L+1(β) (13%), H-1(β)→L+1(β) (2%)                                                                                                                 |
| 10                   | 533                    | 18778                           | 0.5117                        | H-2(β)→L(β) (44%), H-2(α)→L(α) (44%),<br>H-15(β)→L+1(β) (3%),<br>H-14(β)→L+1(β) (3%), H-2(β)→L+1(β) (2%)                                                                                   |
| 11                   | 525                    | 19050                           | 0.0583                        | H-2(β)→L+1(β) (43%),<br>H-15(β)→L+1(β) (15%),<br>H-1(β)→L+1(β) (14%),<br>H-14(β)→L+1(β) (10%), H-2(α)→L(α) (4%),<br>H-2(β)→L(β) (3%), H-4(β)→L+1(β) (2%)                                   |
| 19                   | 448                    | 22304                           | 0.0367                        | H-3(α)→L(α) (49%), H-3(β)→L(β) (36%),<br>H-4(α)→L(α) (8%)                                                                                                                                  |
| 21                   | 431                    | 23179                           | 0.8339                        | H(β)→L+2(β) (48%), H(α)→L+1(α) (47%)                                                                                                                                                       |
| 26                   | 402                    | 24848                           | 0.0533                        | H-6(β)→L(β) (20%), H-7(α)→L(α) (13%),                                                                                                                                                      |

|    |     |       |        |                                                                                                                                                                                                                                                                                                                                                                                                                                                                                                                                                                                                                                                                                                                                                                                                                                                                                                                                                                                                                                                           |
|----|-----|-------|--------|-----------------------------------------------------------------------------------------------------------------------------------------------------------------------------------------------------------------------------------------------------------------------------------------------------------------------------------------------------------------------------------------------------------------------------------------------------------------------------------------------------------------------------------------------------------------------------------------------------------------------------------------------------------------------------------------------------------------------------------------------------------------------------------------------------------------------------------------------------------------------------------------------------------------------------------------------------------------------------------------------------------------------------------------------------------|
| 27 | 401 | 24934 | 0.0363 | H-5( $\beta$ ) $\rightarrow$ L( $\beta$ ) (12%), H-2( $\beta$ ) $\rightarrow$ L+2( $\beta$ ) (11%),<br>H-4( $\beta$ ) $\rightarrow$ L( $\beta$ ) (7%), H-2( $\alpha$ ) $\rightarrow$ L+1( $\alpha$ ) (7%),<br>H-9( $\alpha$ ) $\rightarrow$ L( $\alpha$ ) (7%), H-8( $\alpha$ ) $\rightarrow$ L( $\alpha$ ) (6%),<br>H-5( $\alpha$ ) $\rightarrow$ L( $\alpha$ ) (5%), H-8( $\beta$ ) $\rightarrow$ L( $\beta$ ) (2%)<br>H-7( $\alpha$ ) $\rightarrow$ L( $\alpha$ ) (30%), H-2( $\alpha$ ) $\rightarrow$ L+1( $\alpha$ ) (16%),<br>H-2( $\beta$ ) $\rightarrow$ L+2( $\beta$ ) (12%), H-9( $\alpha$ ) $\rightarrow$ L( $\alpha$ ) (5%),<br>H-6( $\alpha$ ) $\rightarrow$ L( $\alpha$ ) (4%), H-9( $\beta$ ) $\rightarrow$ L( $\beta$ ) (4%),<br>H-7( $\beta$ ) $\rightarrow$ L( $\beta$ ) (4%), H-8( $\beta$ ) $\rightarrow$ L( $\beta$ ) (3%),<br>H-4( $\beta$ ) $\rightarrow$ L( $\beta$ ) (3%), H-5( $\alpha$ ) $\rightarrow$ L( $\alpha$ ) (3%),<br>H-6( $\beta$ ) $\rightarrow$ L( $\beta$ ) (2%), H-2( $\alpha$ ) $\rightarrow$ L( $\alpha$ ) (2%) |
| 30 | 387 | 25865 | 0.5147 | H-6( $\alpha$ ) $\rightarrow$ L( $\alpha$ ) (21%), H-5( $\beta$ ) $\rightarrow$ L( $\beta$ ) (16%),<br>H-6( $\beta$ ) $\rightarrow$ L( $\beta$ ) (16%), H-8( $\alpha$ ) $\rightarrow$ L( $\alpha$ ) (14%),<br>H-7( $\beta$ ) $\rightarrow$ L( $\beta$ ) (13%), H-5( $\alpha$ ) $\rightarrow$ L( $\alpha$ ) (7%),<br>H-4( $\beta$ ) $\rightarrow$ L( $\beta$ ) (5%), H-7( $\alpha$ ) $\rightarrow$ L( $\alpha$ ) (3%)                                                                                                                                                                                                                                                                                                                                                                                                                                                                                                                                                                                                                                      |
| 32 | 377 | 26532 | 0.0503 | H-7( $\beta$ ) $\rightarrow$ L( $\beta$ ) (32%), H-8( $\alpha$ ) $\rightarrow$ L( $\alpha$ ) (21%),<br>H-7( $\alpha$ ) $\rightarrow$ L( $\alpha$ ) (13%), H-6( $\beta$ ) $\rightarrow$ L( $\beta$ ) (7%),<br>H-10( $\alpha$ ) $\rightarrow$ L( $\alpha$ ) (4%), H-5( $\alpha$ ) $\rightarrow$ L( $\alpha$ ) (4%),<br>H-9( $\beta$ ) $\rightarrow$ L( $\beta$ ) (4%), H-8( $\beta$ ) $\rightarrow$ L( $\beta$ ) (4%),<br>H-4( $\beta$ ) $\rightarrow$ L( $\beta$ ) (3%), H-6( $\alpha$ ) $\rightarrow$ L( $\alpha$ ) (2%),<br>H-5( $\beta$ ) $\rightarrow$ L( $\beta$ ) (2%)                                                                                                                                                                                                                                                                                                                                                                                                                                                                               |
| 33 | 375 | 26670 | 0.0272 | H-4( $\beta$ ) $\rightarrow$ L+1( $\beta$ ) (56%),<br>H-5( $\beta$ ) $\rightarrow$ L+1( $\beta$ ) (12%),<br>H-15( $\beta$ ) $\rightarrow$ L+1( $\beta$ ) (4%),<br>H-14( $\beta$ ) $\rightarrow$ L+1( $\beta$ ) (4%), H-3( $\beta$ ) $\rightarrow$ L+1( $\beta$ ) (4%),<br>H-13( $\beta$ ) $\rightarrow$ L+1( $\beta$ ) (3%), H-6( $\beta$ ) $\rightarrow$ L+1( $\beta$ ) (3%),<br>H-22( $\beta$ ) $\rightarrow$ L+1( $\beta$ ) (2%), H-9( $\beta$ ) $\rightarrow$ L+1( $\beta$ ) (2%)                                                                                                                                                                                                                                                                                                                                                                                                                                                                                                                                                                     |
| 35 | 360 | 27748 | 0.0919 | H-10( $\beta$ ) $\rightarrow$ L( $\beta$ ) (21%), H-2( $\beta$ ) $\rightarrow$ L+2( $\beta$ ) (21%),<br>H-5( $\beta$ ) $\rightarrow$ L+1( $\beta$ ) (16%), H-11( $\alpha$ ) $\rightarrow$ L( $\alpha$ ) (12%),<br>H-2( $\alpha$ ) $\rightarrow$ L+1( $\alpha$ ) (10%),<br>H-13( $\beta$ ) $\rightarrow$ L+1( $\beta$ ) (2%), H-4( $\beta$ ) $\rightarrow$ L+1( $\beta$ ) (2%)                                                                                                                                                                                                                                                                                                                                                                                                                                                                                                                                                                                                                                                                             |
| 36 | 360 | 27786 | 0.0961 | H-11( $\alpha$ ) $\rightarrow$ L( $\alpha$ ) (29%), H-10( $\beta$ ) $\rightarrow$ L( $\beta$ ) (21%),<br>H-2( $\alpha$ ) $\rightarrow$ L+1( $\alpha$ ) (19%),<br>H-2( $\beta$ ) $\rightarrow$ L+2( $\beta$ ) (10%), H-5( $\beta$ ) $\rightarrow$ L+1( $\beta$ ) (5%),<br>H-11( $\beta$ ) $\rightarrow$ L( $\beta$ ) (2%)                                                                                                                                                                                                                                                                                                                                                                                                                                                                                                                                                                                                                                                                                                                                  |
| 37 | 359 | 27873 | 0.1561 | H-5( $\beta$ ) $\rightarrow$ L+1( $\beta$ ) (42%),<br>H-2( $\alpha$ ) $\rightarrow$ L+1( $\alpha$ ) (12%),<br>H-2( $\beta$ ) $\rightarrow$ L+2( $\beta$ ) (11%), H-9( $\alpha$ ) $\rightarrow$ L( $\alpha$ ) (4%),<br>H-4( $\beta$ ) $\rightarrow$ L+1( $\beta$ ) (4%), H-13( $\beta$ ) $\rightarrow$ L+1( $\beta$ ) (3%),<br>H-8( $\beta$ ) $\rightarrow$ L( $\beta$ ) (3%), H-9( $\beta$ ) $\rightarrow$ L+1( $\beta$ ) (3%),<br>H-10( $\beta$ ) $\rightarrow$ L( $\beta$ ) (2%), H-11( $\beta$ ) $\rightarrow$ L+1( $\beta$ ) (2%),<br>H-9( $\beta$ ) $\rightarrow$ L( $\beta$ ) (2%)                                                                                                                                                                                                                                                                                                                                                                                                                                                                  |
| 38 | 349 | 28615 | 0.1220 | H-9( $\alpha$ ) $\rightarrow$ L( $\alpha$ ) (37%), H-9( $\beta$ ) $\rightarrow$ L( $\beta$ ) (22%),<br>H-8( $\beta$ ) $\rightarrow$ L( $\beta$ ) (17%), H-2( $\beta$ ) $\rightarrow$ L+2( $\beta$ ) (6%),<br>H-2( $\alpha$ ) $\rightarrow$ L+1( $\alpha$ ) (6%), H-5( $\beta$ ) $\rightarrow$ L+1( $\beta$ ) (2%),<br>H-10( $\beta$ ) $\rightarrow$ L( $\beta$ ) (2%), H-11( $\alpha$ ) $\rightarrow$ L( $\alpha$ ) (2%)                                                                                                                                                                                                                                                                                                                                                                                                                                                                                                                                                                                                                                  |
| 41 | 345 | 29005 | 0.0216 | H-6( $\beta$ ) $\rightarrow$ L+1( $\beta$ ) (50%), H-9( $\beta$ ) $\rightarrow$ L+1( $\beta$ ) (7%),                                                                                                                                                                                                                                                                                                                                                                                                                                                                                                                                                                                                                                                                                                                                                                                                                                                                                                                                                      |

|    |     |       |        |                                                                                                                                                                                                                                                                                                                                                                                                                                                                                                                                                                                                                                                 |
|----|-----|-------|--------|-------------------------------------------------------------------------------------------------------------------------------------------------------------------------------------------------------------------------------------------------------------------------------------------------------------------------------------------------------------------------------------------------------------------------------------------------------------------------------------------------------------------------------------------------------------------------------------------------------------------------------------------------|
| 42 | 344 | 29089 | 0.0254 | H-3( $\beta$ ) $\rightarrow$ L+2( $\beta$ ) (4%), H-3( $\alpha$ ) $\rightarrow$ L+1( $\alpha$ ) (3%),<br>H-15( $\beta$ ) $\rightarrow$ L+1( $\beta$ ) (3%),<br>H-14( $\beta$ ) $\rightarrow$ L+1( $\beta$ ) (2%), H-5( $\beta$ ) $\rightarrow$ L+1( $\beta$ ) (2%),<br>H( $\alpha$ ) $\rightarrow$ L+2( $\alpha$ ) (2%), H( $\beta$ ) $\rightarrow$ L+3( $\beta$ ) (2%),<br>H-7( $\beta$ ) $\rightarrow$ L+1( $\beta$ ) (2%), H-8( $\beta$ ) $\rightarrow$ L+1( $\beta$ ) (2%),<br>H-3( $\alpha$ ) $\rightarrow$ L+4( $\alpha$ ) (2%)                                                                                                           |
| 52 | 316 | 31644 | 0.1279 | H-11( $\alpha$ ) $\rightarrow$ L( $\alpha$ ) (44%),<br>H-10( $\beta$ ) $\rightarrow$ L( $\beta$ ) (36%), H-13( $\alpha$ ) $\rightarrow$ L( $\alpha$ ) (5%),<br>H-12( $\beta$ ) $\rightarrow$ L( $\beta$ ) (3%), H-9( $\alpha$ ) $\rightarrow$ L( $\alpha$ ) (2%),<br>H-8( $\beta$ ) $\rightarrow$ L( $\beta$ ) (2%)                                                                                                                                                                                                                                                                                                                             |
| 58 | 305 | 32820 | 0.0386 | H( $\beta$ ) $\rightarrow$ L+3( $\beta$ ) (49%), H( $\alpha$ ) $\rightarrow$ L+2( $\alpha$ ) (37%),<br>H( $\beta$ ) $\rightarrow$ L+4( $\beta$ ) (2%)                                                                                                                                                                                                                                                                                                                                                                                                                                                                                           |
| 66 | 291 | 34371 | 0.0557 | H-10( $\beta$ ) $\rightarrow$ L+1( $\beta$ ) (81%),<br>H-11( $\beta$ ) $\rightarrow$ L+1( $\beta$ ) (3%),<br>H-21( $\beta$ ) $\rightarrow$ L+1( $\beta$ ) (2%), H-27( $\beta$ ) $\rightarrow$ L+1( $\beta$ ) (2%)                                                                                                                                                                                                                                                                                                                                                                                                                               |
| 71 | 284 | 35234 | 0.0546 | H-12( $\beta$ ) $\rightarrow$ L( $\beta$ ) (27%), H-13( $\alpha$ ) $\rightarrow$ L( $\alpha$ ) (26%),<br>H-5( $\beta$ ) $\rightarrow$ L+2( $\beta$ ) (15%),<br>H-6( $\alpha$ ) $\rightarrow$ L+1( $\alpha$ ) (14%),<br>H-11( $\beta$ ) $\rightarrow$ L+1( $\beta$ ) (3%), H-11( $\alpha$ ) $\rightarrow$ L( $\alpha$ ) (2%)                                                                                                                                                                                                                                                                                                                     |
| 72 | 283 | 35282 | 0.2069 | H-5( $\beta$ ) $\rightarrow$ L+2( $\beta$ ) (18%),<br>H-6( $\alpha$ ) $\rightarrow$ L+1( $\alpha$ ) (15%), H( $\beta$ ) $\rightarrow$ L+5( $\beta$ ) (11%),<br>H-12( $\beta$ ) $\rightarrow$ L( $\beta$ ) (10%), H-13( $\alpha$ ) $\rightarrow$ L( $\alpha$ ) (7%),<br>H-13( $\beta$ ) $\rightarrow$ L( $\beta$ ) (5%), H( $\alpha$ ) $\rightarrow$ L+4( $\alpha$ ) (5%),<br>H-8( $\alpha$ ) $\rightarrow$ L+1( $\alpha$ ) (3%), H-5( $\alpha$ ) $\rightarrow$ L+1( $\alpha$ ) (3%),<br>H-4( $\beta$ ) $\rightarrow$ L+2( $\beta$ ) (3%),<br>H-6( $\beta$ ) $\rightarrow$ L+2( $\beta$ ) (2%), H-2( $\beta$ ) $\rightarrow$ L+3( $\beta$ ) (2%) |
| 89 | 266 | 37652 | 0.0382 | H( $\beta$ ) $\rightarrow$ L+5( $\beta$ ) (28%), H( $\alpha$ ) $\rightarrow$ L+4( $\alpha$ ) (21%),<br>H-6( $\beta$ ) $\rightarrow$ L+2( $\beta$ ) (17%),<br>H-7( $\alpha$ ) $\rightarrow$ L+1( $\alpha$ ) (12%), H-6( $\alpha$ ) $\rightarrow$ L+1( $\alpha$ ) (6%),<br>H-5( $\beta$ ) $\rightarrow$ L+2( $\beta$ ) (3%), H-5( $\alpha$ ) $\rightarrow$ L+1( $\alpha$ ) (3%),<br>H-2( $\alpha$ ) $\rightarrow$ L+2( $\alpha$ ) (2%), H-8( $\alpha$ ) $\rightarrow$ L+1( $\alpha$ ) (2%)                                                                                                                                                        |
| 96 | 260 | 38470 | 0.0350 | H-9( $\alpha$ ) $\rightarrow$ L+1( $\alpha$ ) (30%),<br>H-9( $\beta$ ) $\rightarrow$ L+2( $\beta$ ) (25%),<br>H-8( $\beta$ ) $\rightarrow$ L+2( $\beta$ ) (23%), H-2( $\beta$ ) $\rightarrow$ L+3( $\beta$ ) (2%),<br>H-14( $\alpha$ ) $\rightarrow$ L( $\alpha$ ) (2%), H-2( $\beta$ ) $\rightarrow$ L+5( $\beta$ ) (2%)                                                                                                                                                                                                                                                                                                                       |
| 97 | 259 | 38644 | 0.1446 | H-10( $\beta$ ) $\rightarrow$ L+2( $\beta$ ) (29%),<br>H-11( $\alpha$ ) $\rightarrow$ L+1( $\alpha$ ) (29%),<br>H( $\beta$ ) $\rightarrow$ L+6( $\beta$ ) (9%), H( $\alpha$ ) $\rightarrow$ L+5( $\alpha$ ) (7%),<br>H-2( $\alpha$ ) $\rightarrow$ L+3( $\alpha$ ) (2%),<br>H-13( $\alpha$ ) $\rightarrow$ L+1( $\alpha$ ) (2%), H-2( $\beta$ ) $\rightarrow$ L+4( $\beta$ ) (2%),<br>H-16( $\alpha$ ) $\rightarrow$ L( $\alpha$ ) (2%)                                                                                                                                                                                                         |
|    |     |       |        | H( $\beta$ ) $\rightarrow$ L+6( $\beta$ ) (28%), H( $\alpha$ ) $\rightarrow$ L+5( $\alpha$ ) (25%),<br>H-10( $\beta$ ) $\rightarrow$ L+2( $\beta$ ) (10%),<br>H-11( $\alpha$ ) $\rightarrow$ L+1( $\alpha$ ) (8%),<br>H-1( $\beta$ ) $\rightarrow$ L+14( $\beta$ ) (3%),<br>H-13( $\beta$ ) $\rightarrow$ L+1( $\beta$ ) (2%),                                                                                                                                                                                                                                                                                                                  |

|     |     |       |        |                                                                                                                                                                                                                                                                                                                                                                                                                                                                                                                                                                                                                                                       |
|-----|-----|-------|--------|-------------------------------------------------------------------------------------------------------------------------------------------------------------------------------------------------------------------------------------------------------------------------------------------------------------------------------------------------------------------------------------------------------------------------------------------------------------------------------------------------------------------------------------------------------------------------------------------------------------------------------------------------------|
| 98  | 258 | 38749 | 0.0222 | H-13( $\alpha$ ) $\rightarrow$ L+1( $\alpha$ ) (2%), H-15( $\beta$ ) $\rightarrow$ L( $\beta$ ) (2%),<br>H-2( $\alpha$ ) $\rightarrow$ L+3( $\alpha$ ) (26%),<br>H-1( $\alpha$ ) $\rightarrow$ L+13( $\alpha$ ) (10%), H-16( $\alpha$ ) $\rightarrow$ L( $\alpha$ ) (7%),<br>H-1( $\beta$ ) $\rightarrow$ L+14( $\beta$ ) (6%),<br>H( $\alpha$ ) $\rightarrow$ L+5( $\alpha$ ) (4%), H-2( $\beta$ ) $\rightarrow$ L+4( $\beta$ ) (4%),<br>H-16( $\beta$ ) $\rightarrow$ L( $\beta$ ) (3%), H-18( $\alpha$ ) $\rightarrow$ L( $\alpha$ ) (2%),<br>H-19( $\beta$ ) $\rightarrow$ L( $\beta$ ) (2%), H-1( $\alpha$ ) $\rightarrow$ L+10( $\alpha$ ) (2%) |
| 99  | 258 | 38789 | 0.0219 | H-2( $\beta$ ) $\rightarrow$ L+4( $\beta$ ) (43%),<br>H-2( $\alpha$ ) $\rightarrow$ L+3( $\alpha$ ) (23%),<br>H-1( $\alpha$ ) $\rightarrow$ L+13( $\alpha$ ) (4%),<br>H( $\alpha$ ) $\rightarrow$ L+5( $\alpha$ ) (3%), H-16( $\alpha$ ) $\rightarrow$ L( $\alpha$ ) (2%),<br>H-16( $\beta$ ) $\rightarrow$ L( $\beta$ ) (2%), H-1( $\beta$ ) $\rightarrow$ L+14( $\beta$ ) (2%)                                                                                                                                                                                                                                                                      |
| 100 | 256 | 38990 | 0.0394 | H-15( $\alpha$ ) $\rightarrow$ L( $\alpha$ ) (24%), H-16( $\alpha$ ) $\rightarrow$ L( $\alpha$ ) (13%),<br>H-2( $\beta$ ) $\rightarrow$ L+4( $\beta$ ) (11%),<br>H-4( $\alpha$ ) $\rightarrow$ L+2( $\alpha$ ) (9%), H-2( $\alpha$ ) $\rightarrow$ L+3( $\alpha$ ) (8%),<br>H-13( $\beta$ ) $\rightarrow$ L+1( $\beta$ ) (3%), H-2( $\beta$ ) $\rightarrow$ L+5( $\beta$ ) (2%)                                                                                                                                                                                                                                                                       |

### Co\_3TA

| <i>Excited State</i> | <i>Wavelength (nm)</i> | <i>Energy (cm<sup>-1</sup>)</i> | <i>Oscillator Strength, f</i> | <i>% Contributions</i>                                                                                                                                                                                                                                                                                                                                                                                                                                                |
|----------------------|------------------------|---------------------------------|-------------------------------|-----------------------------------------------------------------------------------------------------------------------------------------------------------------------------------------------------------------------------------------------------------------------------------------------------------------------------------------------------------------------------------------------------------------------------------------------------------------------|
| 8                    | 750                    | 13331                           | 0.0591                        | H-2( $\beta$ ) $\rightarrow$ L( $\beta$ ) (36%), H-1( $\beta$ ) $\rightarrow$ L( $\beta$ ) (17%),<br>H( $\alpha$ ) $\rightarrow$ L( $\alpha$ ) (16%), H-1( $\alpha$ ) $\rightarrow$ L( $\alpha$ ) (5%),<br>H( $\beta$ ) $\rightarrow$ L( $\beta$ ) (5%), H( $\alpha$ ) $\rightarrow$ L+2( $\alpha$ ) (4%),<br>H-2( $\alpha$ ) $\rightarrow$ L+2( $\alpha$ ) (4%), H-5( $\alpha$ ) $\rightarrow$ L+2( $\alpha$ ) (2%)                                                  |
| 10                   | 672                    | 14875                           | 0.0688                        | H-2( $\beta$ ) $\rightarrow$ L( $\beta$ ) (34%), H-1( $\beta$ ) $\rightarrow$ L( $\beta$ ) (19%),<br>H( $\alpha$ ) $\rightarrow$ L( $\alpha$ ) (15%), H-2( $\alpha$ ) $\rightarrow$ L( $\alpha$ ) (13%),<br>H-1( $\alpha$ ) $\rightarrow$ L( $\alpha$ ) (6%), H-5( $\alpha$ ) $\rightarrow$ L( $\alpha$ ) (3%),<br>H-3( $\alpha$ ) $\rightarrow$ L( $\alpha$ ) (2%)                                                                                                   |
| 11                   | 651                    | 15371                           | 0.0825                        | H-1( $\alpha$ ) $\rightarrow$ L( $\alpha$ ) (48%), H-3( $\beta$ ) $\rightarrow$ L( $\beta$ ) (13%),<br>H-2( $\beta$ ) $\rightarrow$ L( $\beta$ ) (10%), H( $\beta$ ) $\rightarrow$ L( $\beta$ ) (10%),<br>H-1( $\beta$ ) $\rightarrow$ L( $\beta$ ) (2%), H-3( $\alpha$ ) $\rightarrow$ L( $\alpha$ ) (2%)                                                                                                                                                            |
| 12                   | 611                    | 16373                           | 0.0380                        | H-3( $\alpha$ ) $\rightarrow$ L( $\alpha$ ) (40%), H-2( $\alpha$ ) $\rightarrow$ L( $\alpha$ ) (19%),<br>H-3( $\beta$ ) $\rightarrow$ L( $\beta$ ) (14%), H-4( $\alpha$ ) $\rightarrow$ L( $\alpha$ ) (6%),<br>H-6( $\alpha$ ) $\rightarrow$ L( $\alpha$ ) (5%), H-1( $\alpha$ ) $\rightarrow$ L( $\alpha$ ) (3%),<br>H( $\alpha$ ) $\rightarrow$ L+1( $\alpha$ ) (2%), H-4( $\beta$ ) $\rightarrow$ L( $\beta$ ) (2%)                                                |
| 13                   | 586                    | 17052                           | 0.0771                        | H-2( $\alpha$ ) $\rightarrow$ L( $\alpha$ ) (44%), H-3( $\beta$ ) $\rightarrow$ L( $\beta$ ) (8%),<br>H-4( $\alpha$ ) $\rightarrow$ L( $\alpha$ ) (7%), H-1( $\beta$ ) $\rightarrow$ L( $\beta$ ) (6%),<br>H-2( $\beta$ ) $\rightarrow$ L( $\beta$ ) (5%),<br>H( $\alpha$ ) $\rightarrow$ L( $\alpha$ ) (2%), H-1( $\alpha$ ) $\rightarrow$ L+2( $\alpha$ ) (2%),<br>H( $\beta$ ) $\rightarrow$ L+6( $\beta$ ) (2%), H-3( $\alpha$ ) $\rightarrow$ L( $\alpha$ ) (2%) |
| 14                   | 579                    | 17260                           | 0.0208                        | H-3( $\alpha$ ) $\rightarrow$ L( $\alpha$ ) (23%), H-2( $\alpha$ ) $\rightarrow$ L( $\alpha$ ) (14%),<br>H( $\beta$ ) $\rightarrow$ L+6( $\beta$ ) (6%), H-4( $\alpha$ ) $\rightarrow$ L( $\alpha$ ) (5%),<br>H-1( $\alpha$ ) $\rightarrow$ L+2( $\alpha$ ) (5%), H-2( $\beta$ ) $\rightarrow$ L( $\beta$ ) (4%),<br>H-14( $\alpha$ ) $\rightarrow$ L+2( $\alpha$ ) (3%),<br>H-21( $\alpha$ ) $\rightarrow$ L+2( $\alpha$ ) (2%),                                     |



|    |     |       |        |                                                                                                                                                                                                                                                                                                                                                                                                                                                                                                                                                                                                                                                                                                                                                                                                                                                                                                                                                                                                                                                                           |
|----|-----|-------|--------|---------------------------------------------------------------------------------------------------------------------------------------------------------------------------------------------------------------------------------------------------------------------------------------------------------------------------------------------------------------------------------------------------------------------------------------------------------------------------------------------------------------------------------------------------------------------------------------------------------------------------------------------------------------------------------------------------------------------------------------------------------------------------------------------------------------------------------------------------------------------------------------------------------------------------------------------------------------------------------------------------------------------------------------------------------------------------|
| 15 | 575 | 17405 | 0.0868 | H-3( $\beta$ ) $\rightarrow$ L( $\beta$ ) (2%), H-8( $\beta$ ) $\rightarrow$ L+4( $\beta$ ) (2%),<br>H-8( $\beta$ ) $\rightarrow$ L+6( $\beta$ ) (2%), H-15( $\alpha$ ) $\rightarrow$ L+2( $\alpha$ ) (2%),<br>H-1( $\beta$ ) $\rightarrow$ L( $\beta$ ) (2%)<br>H-3( $\alpha$ ) $\rightarrow$ L( $\alpha$ ) (17%), H-4( $\alpha$ ) $\rightarrow$ L( $\alpha$ ) (13%),<br>H-3( $\beta$ ) $\rightarrow$ L( $\beta$ ) (10%), H-1( $\alpha$ ) $\rightarrow$ L( $\alpha$ ) (8%),<br>H-1( $\alpha$ ) $\rightarrow$ L+2( $\alpha$ ) (3%), H-7( $\alpha$ ) $\rightarrow$ L( $\alpha$ ) (2%),<br>H-21( $\alpha$ ) $\rightarrow$ L+2( $\alpha$ ) (2%), H-2( $\beta$ ) $\rightarrow$ L( $\beta$ ) (2%),<br>H-14( $\alpha$ ) $\rightarrow$ L+2( $\alpha$ ) (2%),<br>H-15( $\alpha$ ) $\rightarrow$ L+2( $\alpha$ ) (2%),<br>H-8( $\beta$ ) $\rightarrow$ L+6( $\beta$ ) (2%), H-8( $\beta$ ) $\rightarrow$ L+4( $\beta$ ) (2%),<br>H( $\beta$ ) $\rightarrow$ L( $\beta$ ) (2%), H-8( $\beta$ ) $\rightarrow$ L+5( $\beta$ ) (2%),<br>H( $\beta$ ) $\rightarrow$ L+6( $\beta$ ) (2%) |
| 19 | 523 | 19108 | 0.1686 | H-4( $\alpha$ ) $\rightarrow$ L( $\alpha$ ) (30%), H-5( $\beta$ ) $\rightarrow$ L( $\beta$ ) (20%),<br>H-6( $\beta$ ) $\rightarrow$ L( $\beta$ ) (10%), H-3( $\beta$ ) $\rightarrow$ L( $\beta$ ) (5%),<br>H( $\beta$ ) $\rightarrow$ L+6( $\beta$ ) (3%), H-1( $\alpha$ ) $\rightarrow$ L( $\alpha$ ) (2%),<br>H-8( $\beta$ ) $\rightarrow$ L( $\beta$ ) (2%), H( $\alpha$ ) $\rightarrow$ L+1( $\alpha$ ) (2%),<br>H-6( $\beta$ ) $\rightarrow$ L+2( $\beta$ ) (2%), H-2( $\alpha$ ) $\rightarrow$ L+6( $\alpha$ ) (2%)<br>H-3( $\beta$ ) $\rightarrow$ L+2( $\beta$ ) (2%)                                                                                                                                                                                                                                                                                                                                                                                                                                                                                             |
| 20 | 514 | 19472 | 0.1875 | H-3( $\beta$ ) $\rightarrow$ L( $\beta$ ) (19%),<br>H-5( $\beta$ ) $\rightarrow$ L( $\beta$ ) (17%), H-4( $\alpha$ ) $\rightarrow$ L( $\alpha$ ) (7%),<br>H-6( $\beta$ ) $\rightarrow$ L( $\beta$ ) (6%), H-4( $\beta$ ) $\rightarrow$ L( $\beta$ ) (4%),<br>H-6( $\alpha$ ) $\rightarrow$ L( $\alpha$ ) (4%), H-8( $\beta$ ) $\rightarrow$ L+3( $\beta$ ) (4%),<br>H-1( $\alpha$ ) $\rightarrow$ L( $\alpha$ ) (4%), H-8( $\beta$ ) $\rightarrow$ L+4( $\beta$ ) (2%),<br>H-8( $\beta$ ) $\rightarrow$ L+2( $\beta$ ) (2%), H-8( $\beta$ ) $\rightarrow$ L( $\beta$ ) (2%),<br>H-7( $\alpha$ ) $\rightarrow$ L( $\alpha$ ) (2%), H-8( $\alpha$ ) $\rightarrow$ L( $\alpha$ ) (2%)                                                                                                                                                                                                                                                                                                                                                                                        |
| 21 | 504 | 19834 | 0.0680 | H-3( $\beta$ ) $\rightarrow$ L( $\beta$ ) (14%), H-4( $\alpha$ ) $\rightarrow$ L( $\alpha$ ) (14%),<br>H-8( $\beta$ ) $\rightarrow$ L+3( $\beta$ ) (9%), H-8( $\beta$ ) $\rightarrow$ L+6( $\beta$ ) (4%),<br>H-8( $\beta$ ) $\rightarrow$ L+4( $\beta$ ) (4%), H-2( $\beta$ ) $\rightarrow$ L+6( $\beta$ ) (3%),<br>H-8( $\beta$ ) $\rightarrow$ L+2( $\beta$ ) (3%), H-5( $\beta$ ) $\rightarrow$ L+3( $\beta$ ) (3%),<br>H-6( $\beta$ ) $\rightarrow$ L( $\beta$ ) (2%), H-3( $\alpha$ ) $\rightarrow$ L+2( $\alpha$ ) (2%),<br>H-5( $\beta$ ) $\rightarrow$ L( $\beta$ ) (2%), H-1( $\beta$ ) $\rightarrow$ L+6( $\beta$ ) (2%),<br>H-7( $\beta$ ) $\rightarrow$ L( $\beta$ ) (2%), H-5( $\beta$ ) $\rightarrow$ L+6( $\beta$ ) (2%)                                                                                                                                                                                                                                                                                                                                  |
| 30 | 442 | 22609 | 0.0214 | H-8( $\beta$ ) $\rightarrow$ L( $\beta$ ) (56%), H-7( $\beta$ ) $\rightarrow$ L( $\beta$ ) (8%),<br>H-11( $\beta$ ) $\rightarrow$ L( $\beta$ ) (5%), H-5( $\beta$ ) $\rightarrow$ L( $\beta$ ) (4%),<br>H-12( $\beta$ ) $\rightarrow$ L( $\beta$ ) (4%), H-1( $\beta$ ) $\rightarrow$ L+1( $\beta$ ) (3%),<br>H-6( $\beta$ ) $\rightarrow$ L( $\beta$ ) (2%), H-2( $\beta$ ) $\rightarrow$ L+1( $\beta$ ) (2%),<br>H-6( $\alpha$ ) $\rightarrow$ L( $\alpha$ ) (2%)                                                                                                                                                                                                                                                                                                                                                                                                                                                                                                                                                                                                       |
| 32 | 429 | 23317 | 0.0371 | H-9( $\beta$ ) $\rightarrow$ L( $\beta$ ) (18%), H-12( $\beta$ ) $\rightarrow$ L( $\beta$ ) (18%),<br>H-2( $\beta$ ) $\rightarrow$ L+1( $\beta$ ) (8%), H-8( $\alpha$ ) $\rightarrow$ L( $\alpha$ ) (7%),<br>H-8( $\beta$ ) $\rightarrow$ L( $\beta$ ) (6%), H-10( $\beta$ ) $\rightarrow$ L( $\beta$ ) (5%),<br>H-11( $\alpha$ ) $\rightarrow$ L( $\alpha$ ) (5%), H( $\alpha$ ) $\rightarrow$ L+1( $\alpha$ ) (5%),<br>H-13( $\alpha$ ) $\rightarrow$ L( $\alpha$ ) (3%), H-1( $\beta$ ) $\rightarrow$ L+1( $\beta$ ) (3%),<br>H-1( $\alpha$ ) $\rightarrow$ L+1( $\alpha$ ) (3%), H-5( $\beta$ ) $\rightarrow$ L( $\beta$ ) (2%),<br>H-11( $\beta$ ) $\rightarrow$ L( $\beta$ ) (2%)                                                                                                                                                                                                                                                                                                                                                                                   |
| 33 | 419 | 23878 | 0.1601 | H-1( $\beta$ ) $\rightarrow$ L+1( $\beta$ ) (27%), H( $\alpha$ ) $\rightarrow$ L+1( $\alpha$ ) (21%),<br>H-9( $\beta$ ) $\rightarrow$ L( $\beta$ ) (11%), H-2( $\beta$ ) $\rightarrow$ L+1( $\beta$ ) (7%),                                                                                                                                                                                                                                                                                                                                                                                                                                                                                                                                                                                                                                                                                                                                                                                                                                                               |

|    |     |       |        |                                                                                                                                                                                                                                                                                                                                                                                                                                                                                                                                                                                                                                                                                                                                                  |
|----|-----|-------|--------|--------------------------------------------------------------------------------------------------------------------------------------------------------------------------------------------------------------------------------------------------------------------------------------------------------------------------------------------------------------------------------------------------------------------------------------------------------------------------------------------------------------------------------------------------------------------------------------------------------------------------------------------------------------------------------------------------------------------------------------------------|
|    |     |       |        | H-2( $\alpha$ ) $\rightarrow$ L+1( $\alpha$ ) (4%), H-9( $\alpha$ ) $\rightarrow$ L( $\alpha$ ) (4%),<br>H( $\beta$ ) $\rightarrow$ L+1( $\beta$ ) (3%), H-8( $\alpha$ ) $\rightarrow$ L( $\alpha$ ) (3%),<br>H-13( $\beta$ ) $\rightarrow$ L( $\beta$ ) (3%), H-12( $\beta$ ) $\rightarrow$ L( $\beta$ ) (2%),<br>H-13( $\beta$ ) $\rightarrow$ L( $\beta$ ) (2%)                                                                                                                                                                                                                                                                                                                                                                               |
| 34 | 413 | 24193 | 0.0480 | H-1( $\alpha$ ) $\rightarrow$ L+1( $\alpha$ ) (22%), H-11( $\alpha$ ) $\rightarrow$ L( $\alpha$ ) (13%),<br>H-9( $\beta$ ) $\rightarrow$ L( $\beta$ ) (12%), H-14( $\beta$ ) $\rightarrow$ L( $\beta$ ) (10%),<br>H-1( $\beta$ ) $\rightarrow$ L+1( $\beta$ ) (7%), H-13( $\alpha$ ) $\rightarrow$ L( $\alpha$ ) (4%),<br>H-3( $\beta$ ) $\rightarrow$ L+1( $\beta$ ) (4%), H-12( $\beta$ ) $\rightarrow$ L( $\beta$ ) (3%),<br>H-10( $\beta$ ) $\rightarrow$ L( $\beta$ ) (3%), H-12( $\alpha$ ) $\rightarrow$ L( $\alpha$ ) (3%),<br>H( $\beta$ ) $\rightarrow$ L+1( $\beta$ ) (2%)                                                                                                                                                            |
| 35 | 409 | 24468 | 0.0442 | H-2( $\beta$ ) $\rightarrow$ L+1( $\beta$ ) (24%), H-13( $\beta$ ) $\rightarrow$ L( $\beta$ ) (15%),<br>H-12( $\alpha$ ) $\rightarrow$ L( $\alpha$ ) (13%), H-11( $\alpha$ ) $\rightarrow$ L( $\alpha$ ) (8%),<br>H-12( $\beta$ ) $\rightarrow$ L( $\beta$ ) (6%), H-2( $\alpha$ ) $\rightarrow$ L+1( $\alpha$ ) (5%),<br>H( $\alpha$ ) $\rightarrow$ L+1( $\alpha$ ) (5%), H-14( $\beta$ ) $\rightarrow$ L( $\beta$ ) (2%),<br>H-8( $\alpha$ ) $\rightarrow$ L( $\alpha$ ) (2%)                                                                                                                                                                                                                                                                 |
| 37 | 400 | 24971 | 0.0321 | H-11( $\beta$ ) $\rightarrow$ L( $\beta$ ) (24%), H-14( $\beta$ ) $\rightarrow$ L( $\beta$ ) (10%),<br>H-15( $\beta$ ) $\rightarrow$ L( $\beta$ ) (9%), H-1( $\alpha$ ) $\rightarrow$ L+1( $\alpha$ ) (8%),<br>H-12( $\alpha$ ) $\rightarrow$ L( $\alpha$ ) (7%), H-10( $\alpha$ ) $\rightarrow$ L( $\alpha$ ) (5%),<br>H-9( $\beta$ ) $\rightarrow$ L( $\beta$ ) (4%), H-18( $\alpha$ ) $\rightarrow$ L( $\alpha$ ) (4%),<br>H-1( $\beta$ ) $\rightarrow$ L+1( $\beta$ ) (3%), H-7( $\beta$ ) $\rightarrow$ L( $\beta$ ) (3%),<br>H-8( $\alpha$ ) $\rightarrow$ L( $\alpha$ ) (3%), H-14( $\alpha$ ) $\rightarrow$ L( $\alpha$ ) (2%),<br>H-2( $\beta$ ) $\rightarrow$ L+1( $\beta$ ) (2%), H-2( $\alpha$ ) $\rightarrow$ L+1( $\alpha$ ) (2%)  |
| 38 | 399 | 25065 | 0.1282 | H-2( $\beta$ ) $\rightarrow$ L+1( $\beta$ ) (29%), H-13( $\beta$ ) $\rightarrow$ L( $\beta$ ) (19%),<br>H-12( $\alpha$ ) $\rightarrow$ L( $\alpha$ ) (15%), H-11( $\beta$ ) $\rightarrow$ L( $\beta$ ) (6%),<br>H-1( $\beta$ ) $\rightarrow$ L+1( $\beta$ ) (5%), H-3( $\alpha$ ) $\rightarrow$ L+1( $\alpha$ ) (3%),<br>H-11( $\alpha$ ) $\rightarrow$ L( $\alpha$ ) (2%), H( $\alpha$ ) $\rightarrow$ L+1( $\alpha$ ) (2%)                                                                                                                                                                                                                                                                                                                     |
| 39 | 392 | 25486 | 0.3458 | H-10( $\beta$ ) $\rightarrow$ L( $\beta$ ) (38%), H-9( $\alpha$ ) $\rightarrow$ L( $\alpha$ ) (35%),<br>H-9( $\beta$ ) $\rightarrow$ L( $\beta$ ) (6%), H-13( $\alpha$ ) $\rightarrow$ L( $\alpha$ ) (6%),<br>H-10( $\alpha$ ) $\rightarrow$ L( $\alpha$ ) (5%), H-15( $\alpha$ ) $\rightarrow$ L( $\alpha$ ) (3%)                                                                                                                                                                                                                                                                                                                                                                                                                               |
| 40 | 391 | 25586 | 0.1618 | H-13( $\alpha$ ) $\rightarrow$ L( $\alpha$ ) (22%), H-15( $\alpha$ ) $\rightarrow$ L( $\alpha$ ) (13%),<br>H-9( $\alpha$ ) $\rightarrow$ L( $\alpha$ ) (9%), H-9( $\beta$ ) $\rightarrow$ L( $\beta$ ) (9%),<br>H-12( $\beta$ ) $\rightarrow$ L( $\beta$ ) (5%), H-17( $\alpha$ ) $\rightarrow$ L( $\alpha$ ) (5%),<br>H-14( $\beta$ ) $\rightarrow$ L( $\beta$ ) (5%), H-10( $\alpha$ ) $\rightarrow$ L( $\alpha$ ) (5%),<br>H-14( $\alpha$ ) $\rightarrow$ L( $\alpha$ ) (4%), H-11( $\beta$ ) $\rightarrow$ L( $\beta$ ) (4%),<br>H-1( $\alpha$ ) $\rightarrow$ L+1( $\alpha$ ) (3%), H-8( $\beta$ ) $\rightarrow$ L( $\beta$ ) (2%),<br>H-11( $\alpha$ ) $\rightarrow$ L( $\alpha$ ) (2%), H-16( $\alpha$ ) $\rightarrow$ L( $\alpha$ ) (2%) |
| 42 | 380 | 26294 | 0.1705 | H-2( $\alpha$ ) $\rightarrow$ L+1( $\alpha$ ) (52%),<br>H-3( $\alpha$ ) $\rightarrow$ L+1( $\alpha$ ) (16%), H-1( $\beta$ ) $\rightarrow$ L+1( $\beta$ ) (7%),<br>H-4( $\beta$ ) $\rightarrow$ L+1( $\beta$ ) (3%), H-13( $\beta$ ) $\rightarrow$ L( $\beta$ ) (2%),<br>H-11( $\alpha$ ) $\rightarrow$ L( $\alpha$ ) (2%)                                                                                                                                                                                                                                                                                                                                                                                                                        |
| 43 | 378 | 26472 | 0.0256 | H-12( $\beta$ ) $\rightarrow$ L( $\beta$ ) (27%), H-14( $\alpha$ ) $\rightarrow$ L( $\alpha$ ) (21%),<br>H-15( $\alpha$ ) $\rightarrow$ L( $\alpha$ ) (8%), H-13( $\alpha$ ) $\rightarrow$ L( $\alpha$ ) (7%),<br>H-11( $\alpha$ ) $\rightarrow$ L( $\alpha$ ) (7%), H-12( $\alpha$ ) $\rightarrow$ L( $\alpha$ ) (3%),<br>H-17( $\alpha$ ) $\rightarrow$ L( $\alpha$ ) (3%), H-2( $\alpha$ ) $\rightarrow$ L+1( $\alpha$ ) (3%),<br>H-18( $\alpha$ ) $\rightarrow$ L( $\alpha$ ) (2%), H-14( $\beta$ ) $\rightarrow$ L( $\beta$ ) (2%),<br>H-3( $\alpha$ ) $\rightarrow$ L+1( $\alpha$ ) (2%)                                                                                                                                                   |

|    |     |       |        |                                                                                                                                                                                                                                                                                                                                                                                                                                                                                                                                           |
|----|-----|-------|--------|-------------------------------------------------------------------------------------------------------------------------------------------------------------------------------------------------------------------------------------------------------------------------------------------------------------------------------------------------------------------------------------------------------------------------------------------------------------------------------------------------------------------------------------------|
| 45 | 374 | 26730 | 0.1700 | H-3( $\alpha$ ) $\rightarrow$ L+1( $\alpha$ ) (41%),<br>H-2( $\alpha$ ) $\rightarrow$ L+1( $\alpha$ ) (21%),<br>H-3( $\beta$ ) $\rightarrow$ L+1( $\beta$ ) (12%), H-2( $\beta$ ) $\rightarrow$ L+1( $\beta$ ) (6%),<br>H-11( $\alpha$ ) $\rightarrow$ L( $\alpha$ ) (4%), H-4( $\alpha$ ) $\rightarrow$ L+1( $\alpha$ ) (3%)                                                                                                                                                                                                             |
| 46 | 372 | 26884 | 0.0354 | H-3( $\beta$ ) $\rightarrow$ L+1( $\beta$ ) (32%),<br>H-4( $\alpha$ ) $\rightarrow$ L+1( $\alpha$ ) (20%),<br>H-3( $\alpha$ ) $\rightarrow$ L+1( $\alpha$ ) (18%), H-2( $\beta$ ) $\rightarrow$ L+1( $\beta$ ) (5%),<br>H-11( $\beta$ ) $\rightarrow$ L( $\beta$ ) (3%), H-11( $\alpha$ ) $\rightarrow$ L( $\alpha$ ) (2%),<br>H-1( $\alpha$ ) $\rightarrow$ L+1( $\alpha$ ) (2%), H-10( $\alpha$ ) $\rightarrow$ L( $\alpha$ ) (2%)                                                                                                      |
| 50 | 360 | 27791 | 0.0726 | H-14( $\beta$ ) $\rightarrow$ L( $\beta$ ) (33%), H-4( $\alpha$ ) $\rightarrow$ L+1( $\alpha$ ) (15%),<br>H-13( $\alpha$ ) $\rightarrow$ L( $\alpha$ ) (15%), H-12( $\alpha$ ) $\rightarrow$ L( $\alpha$ ) (12%),<br>H-11( $\alpha$ ) $\rightarrow$ L( $\alpha$ ) (7%), H-5( $\alpha$ ) $\rightarrow$ L+1( $\alpha$ ) (4%),<br>H-3( $\beta$ ) $\rightarrow$ L+1( $\beta$ ) (2%), H-5( $\beta$ ) $\rightarrow$ L+1( $\beta$ ) (2%),<br>H-12( $\beta$ ) $\rightarrow$ L( $\beta$ ) (2%)                                                     |
| 51 | 357 | 28043 | 0.0347 | H-5( $\alpha$ ) $\rightarrow$ L+1( $\alpha$ ) (68%), H-14( $\beta$ ) $\rightarrow$ L( $\beta$ ) (3%),<br>H( $\alpha$ ) $\rightarrow$ L+2( $\alpha$ ) (3%), H-5( $\beta$ ) $\rightarrow$ L+1( $\beta$ ) (2%),<br>H-15( $\beta$ ) $\rightarrow$ L( $\beta$ ) (2%), H-12( $\alpha$ ) $\rightarrow$ L( $\alpha$ ) (2%),<br>H-4( $\beta$ ) $\rightarrow$ L+1( $\beta$ ) (2%)                                                                                                                                                                   |
| 52 | 354 | 28220 | 0.0935 | H-5( $\beta$ ) $\rightarrow$ L+1( $\beta$ ) (18%),<br>H-4( $\alpha$ ) $\rightarrow$ L+1( $\alpha$ ) (15%),<br>H-3( $\beta$ ) $\rightarrow$ L+1( $\beta$ ) (10%), H-6( $\beta$ ) $\rightarrow$ L+1( $\beta$ ) (6%),<br>H-14( $\beta$ ) $\rightarrow$ L( $\beta$ ) (6%), H-5( $\alpha$ ) $\rightarrow$ L+1( $\alpha$ ) (6%),<br>H-13( $\alpha$ ) $\rightarrow$ L( $\alpha$ ) (5%), H-6( $\alpha$ ) $\rightarrow$ L( $\alpha$ ) (4%),<br>H-15( $\beta$ ) $\rightarrow$ L( $\beta$ ) (4%), H-1( $\alpha$ ) $\rightarrow$ L+1( $\alpha$ ) (3%) |
| 53 | 353 | 28321 | 0.0650 | H-18( $\alpha$ ) $\rightarrow$ L( $\alpha$ ) (45%), H-15( $\beta$ ) $\rightarrow$ L( $\beta$ ) (30%),<br>H-10( $\alpha$ ) $\rightarrow$ L( $\alpha$ ) (3%), H-5( $\beta$ ) $\rightarrow$ L+1( $\beta$ ) (2%),<br>H-7( $\alpha$ ) $\rightarrow$ L+1( $\alpha$ ) (2%), H-21( $\beta$ ) $\rightarrow$ L( $\beta$ ) (2%)                                                                                                                                                                                                                      |
| 55 | 350 | 28610 | 0.0679 | H-4( $\alpha$ ) $\rightarrow$ L+1( $\alpha$ ) (18%),<br>H-6( $\alpha$ ) $\rightarrow$ L+1( $\alpha$ ) (17%),<br>H-5( $\beta$ ) $\rightarrow$ L+1( $\beta$ ) (16%),<br>H-3( $\beta$ ) $\rightarrow$ L+1( $\beta$ ) (14%),<br>H-4( $\beta$ ) $\rightarrow$ L+1( $\beta$ ) (2%), H-12( $\alpha$ ) $\rightarrow$ L( $\alpha$ ) (2%),<br>H-6( $\alpha$ ) $\rightarrow$ L+5( $\alpha$ ) (2%), H-14( $\beta$ ) $\rightarrow$ L( $\beta$ ) (2%)                                                                                                   |
| 58 | 341 | 29359 | 0.0277 | H( $\alpha$ ) $\rightarrow$ L+2( $\alpha$ ) (54%), H-2( $\alpha$ ) $\rightarrow$ L+2( $\alpha$ ) (16%),<br>H-5( $\alpha$ ) $\rightarrow$ L+2( $\alpha$ ) (7%), H-5( $\alpha$ ) $\rightarrow$ L+1( $\alpha$ ) (2%),<br>H-3( $\alpha$ ) $\rightarrow$ L+2( $\alpha$ ) (2%), H-18( $\alpha$ ) $\rightarrow$ L+2( $\alpha$ ) (2%)                                                                                                                                                                                                             |
| 60 | 335 | 29855 | 0.0283 | H-21( $\alpha$ ) $\rightarrow$ L( $\alpha$ ) (42%), H-21( $\beta$ ) $\rightarrow$ L( $\beta$ ) (16%),<br>H-23( $\beta$ ) $\rightarrow$ L( $\beta$ ) (13%), H-22( $\alpha$ ) $\rightarrow$ L( $\alpha$ ) (4%),<br>H-19( $\beta$ ) $\rightarrow$ L( $\beta$ ) (3%), H( $\beta$ ) $\rightarrow$ L+2( $\beta$ ) (3%),<br>H-10( $\beta$ ) $\rightarrow$ L+1( $\beta$ ) (2%), H-9( $\beta$ ) $\rightarrow$ L+1( $\beta$ ) (2%)                                                                                                                  |
| 70 | 320 | 31250 | 0.0266 | H-7( $\alpha$ ) $\rightarrow$ L+1( $\alpha$ ) (43%),<br>H-7( $\beta$ ) $\rightarrow$ L+1( $\beta$ ) (15%),<br>H-6( $\beta$ ) $\rightarrow$ L+1( $\beta$ ) (12%), H-6( $\alpha$ ) $\rightarrow$ L+1( $\alpha$ ) (3%),<br>H-4( $\alpha$ ) $\rightarrow$ L+1( $\alpha$ ) (2%), H-8( $\beta$ ) $\rightarrow$ L+1( $\beta$ ) (2%)                                                                                                                                                                                                              |
| 72 | 317 | 31585 | 0.0256 | H-7( $\beta$ ) $\rightarrow$ L+1( $\beta$ ) (26%), H-8( $\beta$ ) $\rightarrow$ L+1( $\beta$ ) (9%),<br>H( $\beta$ ) $\rightarrow$ L+2( $\beta$ ) (8%), H-7( $\alpha$ ) $\rightarrow$ L+1( $\alpha$ ) (5%),                                                                                                                                                                                                                                                                                                                               |

H( $\beta$ ) $\rightarrow$ L+3( $\beta$ ) (4%), H-2( $\beta$ ) $\rightarrow$ L+2( $\beta$ ) (3%),  
H-8( $\alpha$ ) $\rightarrow$ L+1( $\alpha$ ) (3%), H-11( $\beta$ ) $\rightarrow$ L+1( $\beta$ ) (3%),  
H-12( $\beta$ ) $\rightarrow$ L+1( $\beta$ ) (3%), H-6( $\alpha$ ) $\rightarrow$ L+1( $\alpha$ ) (2%)

### Co\_1TA\_OptFreqPlus

| <i>Excited State</i> | <i>Wavelength (nm)</i> | <i>Energy (cm<sup>-1</sup>)</i> | <i>Oscillator Strength, f</i> | <i>% Contributions</i>                                                                                                                                                                                                                                                                                                                                                                                                                                                                                                                                                                                                                                                                                                                               |
|----------------------|------------------------|---------------------------------|-------------------------------|------------------------------------------------------------------------------------------------------------------------------------------------------------------------------------------------------------------------------------------------------------------------------------------------------------------------------------------------------------------------------------------------------------------------------------------------------------------------------------------------------------------------------------------------------------------------------------------------------------------------------------------------------------------------------------------------------------------------------------------------------|
| 8                    | 727                    | 13749                           | 0.0486                        | H-2( $\beta$ ) $\rightarrow$ L( $\beta$ ) (28%), H( $\alpha$ ) $\rightarrow$ L( $\alpha$ ) (12%),<br>H-1( $\beta$ ) $\rightarrow$ L( $\beta$ ) (12%), H( $\alpha$ ) $\rightarrow$ L+2( $\alpha$ ) (10%),<br>H-5( $\alpha$ ) $\rightarrow$ L+2( $\alpha$ ) (7%), H( $\beta$ ) $\rightarrow$ L( $\beta$ ) (6%),<br>H-2( $\alpha$ ) $\rightarrow$ L+2( $\alpha$ ) (5%), H-1( $\alpha$ ) $\rightarrow$ L( $\alpha$ ) (4%),<br>H-20( $\alpha$ ) $\rightarrow$ L+2( $\alpha$ ) (3%), H-14( $\alpha$ ) $\rightarrow$ L+2( $\alpha$ ) (2%)                                                                                                                                                                                                                   |
| 9                    | 689                    | 14518                           | 0.0349                        | H-2( $\alpha$ ) $\rightarrow$ L( $\alpha$ ) (28%), H-5( $\alpha$ ) $\rightarrow$ L+2( $\alpha$ ) (12%),<br>H-1( $\beta$ ) $\rightarrow$ L( $\beta$ ) (11%), H( $\alpha$ ) $\rightarrow$ L( $\alpha$ ) (11%),<br>H-2( $\alpha$ ) $\rightarrow$ L+2( $\alpha$ ) (9%), H-2( $\beta$ ) $\rightarrow$ L( $\beta$ ) (7%),<br>H( $\beta$ ) $\rightarrow$ L( $\beta$ ) (5%), H-20( $\alpha$ ) $\rightarrow$ L+2( $\alpha$ ) (4%),<br>H-14( $\alpha$ ) $\rightarrow$ L+2( $\alpha$ ) (3%), H-3( $\alpha$ ) $\rightarrow$ L( $\alpha$ ) (2%),<br>H-7( $\alpha$ ) $\rightarrow$ L+2( $\alpha$ ) (2%), H-2( $\alpha$ ) $\rightarrow$ L( $\alpha$ ) (2%)                                                                                                          |
| 10                   | 657                    | 15216                           | 0.0486                        | H-2( $\beta$ ) $\rightarrow$ L( $\beta$ ) (35%), H-1( $\beta$ ) $\rightarrow$ L( $\beta$ ) (16%),<br>H( $\alpha$ ) $\rightarrow$ L( $\alpha$ ) (15%), H-2( $\alpha$ ) $\rightarrow$ L( $\alpha$ ) (12%),<br>H-1( $\alpha$ ) $\rightarrow$ L( $\alpha$ ) (9%), H-5( $\alpha$ ) $\rightarrow$ L( $\alpha$ ) (3%)                                                                                                                                                                                                                                                                                                                                                                                                                                       |
| 11                   | 628                    | 15920                           | 0.0825                        | H-1( $\alpha$ ) $\rightarrow$ L( $\alpha$ ) (40%), H-4( $\beta$ ) $\rightarrow$ L( $\beta$ ) (16%),<br>H-2( $\beta$ ) $\rightarrow$ L( $\beta$ ) (11%), H( $\beta$ ) $\rightarrow$ L( $\beta$ ) (9%),<br>H-2( $\alpha$ ) $\rightarrow$ L( $\alpha$ ) (3%), H-1( $\beta$ ) $\rightarrow$ L( $\beta$ ) (3%)                                                                                                                                                                                                                                                                                                                                                                                                                                            |
| 12                   | 592                    | 16880                           | 0.0710                        | H-3( $\alpha$ ) $\rightarrow$ L( $\alpha$ ) (32%), H-2( $\alpha$ ) $\rightarrow$ L( $\alpha$ ) (28%),<br>H-4( $\beta$ ) $\rightarrow$ L( $\beta$ ) (11%), H-1( $\alpha$ ) $\rightarrow$ L( $\alpha$ ) (8%),<br>H-1( $\alpha$ ) $\rightarrow$ L( $\alpha$ ) (4%), H( $\beta$ ) $\rightarrow$ L( $\beta$ ) (3%),<br>H-4( $\alpha$ ) $\rightarrow$ L( $\alpha$ ) (2%), H-1( $\beta$ ) $\rightarrow$ L( $\beta$ ) (2%),<br>H( $\alpha$ ) $\rightarrow$ L+1( $\alpha$ ) (2%)                                                                                                                                                                                                                                                                              |
| 14                   | 569                    | 17564                           | 0.0736                        | H-2( $\alpha$ ) $\rightarrow$ L( $\alpha$ ) (44%), H-3( $\alpha$ ) $\rightarrow$ L( $\alpha$ ) (14%),<br>H-1( $\beta$ ) $\rightarrow$ L( $\beta$ ) (9%), H-4( $\beta$ ) $\rightarrow$ L( $\beta$ ) (7%),<br>H-2( $\beta$ ) $\rightarrow$ L( $\beta$ ) (6%), H-4( $\alpha$ ) $\rightarrow$ L( $\alpha$ ) (4%)                                                                                                                                                                                                                                                                                                                                                                                                                                         |
| 15                   | 556                    | 17976                           | 0.0892                        | H-3( $\alpha$ ) $\rightarrow$ L( $\alpha$ ) (30%), H-4( $\alpha$ ) $\rightarrow$ L( $\alpha$ ) (14%),<br>H-4( $\beta$ ) $\rightarrow$ L( $\beta$ ) (9%), H-1( $\alpha$ ) $\rightarrow$ L( $\alpha$ ) (6%),<br>H-7( $\alpha$ ) $\rightarrow$ L( $\alpha$ ) (5%), H-3( $\beta$ ) $\rightarrow$ L( $\beta$ ) (3%),<br>H-2( $\beta$ ) $\rightarrow$ L( $\beta$ ) (3%), H-5( $\beta$ ) $\rightarrow$ L( $\beta$ ) (3%),<br>H-5( $\alpha$ ) $\rightarrow$ L( $\alpha$ ) (3%), H( $\beta$ ) $\rightarrow$ L+6( $\beta$ ) (2%),<br>H-3( $\alpha$ ) $\rightarrow$ L+2( $\alpha$ ) (2%), H-2( $\beta$ ) $\rightarrow$ L+6( $\beta$ ) (2%)                                                                                                                      |
| 18                   | 511                    | 19552                           | 0.1012                        | H-5( $\alpha$ ) $\rightarrow$ L( $\alpha$ ) (23%), H-7( $\beta$ ) $\rightarrow$ L+3( $\beta$ ) (5%),<br>H-9( $\beta$ ) $\rightarrow$ L+3( $\beta$ ) (5%), H-4( $\beta$ ) $\rightarrow$ L( $\beta$ ) (5%),<br>H-1( $\alpha$ ) $\rightarrow$ L( $\alpha$ ) (4%), H-4( $\alpha$ ) $\rightarrow$ L( $\alpha$ ) (4%),<br>H-15( $\alpha$ ) $\rightarrow$ L+2( $\alpha$ ) (3%), H-9( $\beta$ ) $\rightarrow$ L+6( $\beta$ ) (3%),<br>H-3( $\alpha$ ) $\rightarrow$ L( $\alpha$ ) (3%), H-2( $\beta$ ) $\rightarrow$ L+6( $\beta$ ) (2%),<br>H-7( $\beta$ ) $\rightarrow$ L+6( $\beta$ ) (2%), H-5( $\beta$ ) $\rightarrow$ L+3( $\beta$ ) (2%),<br>H-18( $\alpha$ ) $\rightarrow$ L+2( $\alpha$ ) (2%), H-3( $\alpha$ ) $\rightarrow$ L+2( $\alpha$ ) (2%), |

|    |     |       |        |                                                                                                                                                                                                                                                                                                                                                                                                                                                                                                                                                                                                                                                                                                             |
|----|-----|-------|--------|-------------------------------------------------------------------------------------------------------------------------------------------------------------------------------------------------------------------------------------------------------------------------------------------------------------------------------------------------------------------------------------------------------------------------------------------------------------------------------------------------------------------------------------------------------------------------------------------------------------------------------------------------------------------------------------------------------------|
| 19 | 508 | 19672 | 0.0662 | H-5( $\beta$ ) $\rightarrow$ L( $\beta$ ) (2%), H-7( $\beta$ ) $\rightarrow$ L+4( $\beta$ ) (2%),<br>H-7( $\beta$ ) $\rightarrow$ L+2( $\beta$ ) (2%), H-5( $\beta$ ) $\rightarrow$ L+6( $\beta$ ) (2%)<br>H-5( $\alpha$ ) $\rightarrow$ L( $\alpha$ ) (52%), H-4( $\alpha$ ) $\rightarrow$ L( $\alpha$ ) (14%),<br>H-6( $\beta$ ) $\rightarrow$ L( $\beta$ ) (4%), H-5( $\beta$ ) $\rightarrow$ L( $\beta$ ) (3%),<br>H-2( $\alpha$ ) $\rightarrow$ L( $\alpha$ ) (2%), H-2( $\beta$ ) $\rightarrow$ L( $\beta$ ) (2%),<br>H( $\beta$ ) $\rightarrow$ L+1( $\beta$ ) (2%)                                                                                                                                  |
| 21 | 491 | 20378 | 0.0973 | H-4( $\alpha$ ) $\rightarrow$ L( $\alpha$ ) (20%), H-4( $\beta$ ) $\rightarrow$ L( $\beta$ ) (8%),<br>H-7( $\beta$ ) $\rightarrow$ L+6( $\beta$ ) (5%), H-18( $\alpha$ ) $\rightarrow$ L+2( $\alpha$ ) (5%),<br>H-15( $\alpha$ ) $\rightarrow$ L+2( $\alpha$ ) (4%),<br>H-16( $\alpha$ ) $\rightarrow$ L+2( $\alpha$ ) (4%),<br>H-9( $\beta$ ) $\rightarrow$ L+6( $\beta$ ) (3%), H-7( $\alpha$ ) $\rightarrow$ L+2( $\alpha$ ) (3%),<br>H-5( $\beta$ ) $\rightarrow$ L+6( $\beta$ ) (3%), H-6( $\beta$ ) $\rightarrow$ L+6( $\beta$ ) (2%),<br>H-8( $\alpha$ ) $\rightarrow$ L+2( $\alpha$ ) (2%), H-4( $\alpha$ ) $\rightarrow$ L+2( $\alpha$ ) (2%),<br>H-4( $\beta$ ) $\rightarrow$ L+6( $\beta$ ) (2%) |
| 22 | 491 | 20383 | 0.1412 | H-4( $\beta$ ) $\rightarrow$ L( $\beta$ ) (25%),<br>H-7( $\alpha$ ) $\rightarrow$ L( $\alpha$ ) (14%), H-6( $\alpha$ ) $\rightarrow$ L( $\alpha$ ) (10%),<br>H-5( $\beta$ ) $\rightarrow$ L( $\beta$ ) (10%), H-4( $\alpha$ ) $\rightarrow$ L( $\alpha$ ) (6%),<br>H-6( $\beta$ ) $\rightarrow$ L( $\beta$ ) (6%), H-7( $\beta$ ) $\rightarrow$ L( $\beta$ ) (4%),<br>H-2( $\beta$ ) $\rightarrow$ L+1( $\beta$ ) (2%)                                                                                                                                                                                                                                                                                      |
| 24 | 471 | 21243 | 0.0202 | H-6( $\alpha$ ) $\rightarrow$ L( $\alpha$ ) (26%), H-6( $\beta$ ) $\rightarrow$ L( $\beta$ ) (21%),<br>H-7( $\beta$ ) $\rightarrow$ L( $\beta$ ) (14%), H-4( $\alpha$ ) $\rightarrow$ L( $\alpha$ ) (5%),<br>H( $\beta$ ) $\rightarrow$ L+1( $\beta$ ) (5%), H-9( $\beta$ ) $\rightarrow$ L( $\beta$ ) (5%),<br>H-1( $\beta$ ) $\rightarrow$ L+1( $\beta$ ) (3%), H-3( $\alpha$ ) $\rightarrow$ L( $\alpha$ ) (2%)                                                                                                                                                                                                                                                                                          |
| 29 | 430 | 23236 | 0.0244 | H-9( $\alpha$ ) $\rightarrow$ L( $\alpha$ ) (24%), H-10( $\beta$ ) $\rightarrow$ L( $\beta$ ) (16%),<br>H( $\beta$ ) $\rightarrow$ L+1( $\beta$ ) (15%), H-8( $\beta$ ) $\rightarrow$ L( $\beta$ ) (11%),<br>H-8( $\alpha$ ) $\rightarrow$ L( $\alpha$ ) (6%), H-9( $\beta$ ) $\rightarrow$ L( $\beta$ ) (6%),<br>H( $\alpha$ ) $\rightarrow$ L+1( $\alpha$ ) (2%), H-10( $\alpha$ ) $\rightarrow$ L( $\alpha$ ) (2%),<br>H-1( $\beta$ ) $\rightarrow$ L+1( $\beta$ ) (2%), H-7( $\beta$ ) $\rightarrow$ L( $\beta$ ) (2%)                                                                                                                                                                                  |
| 32 | 416 | 24059 | 0.2310 | H-1( $\beta$ ) $\rightarrow$ L+1( $\beta$ ) (25%), H( $\alpha$ ) $\rightarrow$ L+1( $\alpha$ ) (22%),<br>H-9( $\beta$ ) $\rightarrow$ L( $\beta$ ) (14%), H-11( $\beta$ ) $\rightarrow$ L( $\beta$ ) (5%),<br>H-2( $\alpha$ ) $\rightarrow$ L+1( $\alpha$ ) (4%), H-2( $\beta$ ) $\rightarrow$ L+1( $\beta$ ) (4%),<br>H-8( $\alpha$ ) $\rightarrow$ L( $\alpha$ ) (3%), H( $\beta$ ) $\rightarrow$ L+1( $\beta$ ) (3%),<br>H-9( $\alpha$ ) $\rightarrow$ L( $\alpha$ ) (3%), H-10( $\beta$ ) $\rightarrow$ L( $\beta$ ) (3%),<br>H-6( $\beta$ ) $\rightarrow$ L( $\beta$ ) (2%), H-5( $\beta$ ) $\rightarrow$ L( $\beta$ ) (2%)                                                                            |
| 34 | 405 | 24670 | 0.0371 | H-11( $\alpha$ ) $\rightarrow$ L( $\alpha$ ) (21%), H-8( $\beta$ ) $\rightarrow$ L( $\beta$ ) (20%),<br>H-13( $\beta$ ) $\rightarrow$ L( $\beta$ ) (14%), H-1( $\alpha$ ) $\rightarrow$ L+1( $\alpha$ ) (10%),<br>H-8( $\alpha$ ) $\rightarrow$ L( $\alpha$ ) (6%), H-12( $\beta$ ) $\rightarrow$ L( $\beta$ ) (4%),<br>H-10( $\beta$ ) $\rightarrow$ L( $\beta$ ) (3%), H-4( $\beta$ ) $\rightarrow$ L+1( $\beta$ ) (3%),<br>H-1( $\beta$ ) $\rightarrow$ L+1( $\beta$ ) (2%), H-14( $\alpha$ ) $\rightarrow$ L( $\alpha$ ) (2%)                                                                                                                                                                           |
| 37 | 395 | 25306 | 0.0964 | H-2( $\beta$ ) $\rightarrow$ L+1( $\beta$ ) (33%), H-14( $\beta$ ) $\rightarrow$ L( $\beta$ ) (18%),<br>H-12( $\alpha$ ) $\rightarrow$ L( $\alpha$ ) (16%), H-13( $\alpha$ ) $\rightarrow$ L( $\alpha$ ) (5%),<br>H-1( $\beta$ ) $\rightarrow$ L+1( $\beta$ ) (4%), H-2( $\alpha$ ) $\rightarrow$ L+1( $\alpha$ ) (3%),<br>H-3( $\alpha$ ) $\rightarrow$ L+1( $\alpha$ ) (2%), H( $\alpha$ ) $\rightarrow$ L+1( $\alpha$ ) (2%)                                                                                                                                                                                                                                                                             |
| 38 | 390 | 25631 | 0.3809 | H-9( $\alpha$ ) $\rightarrow$ L( $\alpha$ ) (36%), H-8( $\beta$ ) $\rightarrow$ L( $\beta$ ) (27%),<br>H-10( $\beta$ ) $\rightarrow$ L( $\beta$ ) (16%), H-13( $\beta$ ) $\rightarrow$ L( $\beta$ ) (8%),<br>H-12( $\beta$ ) $\rightarrow$ L( $\beta$ ) (2%), H-10( $\alpha$ ) $\rightarrow$ L( $\alpha$ ) (2%)                                                                                                                                                                                                                                                                                                                                                                                             |

|    |     |       |        |                                                                                                                                                                                                                                                                                                                                                                                                                                                                                                                                                                                                                                                                                                 |
|----|-----|-------|--------|-------------------------------------------------------------------------------------------------------------------------------------------------------------------------------------------------------------------------------------------------------------------------------------------------------------------------------------------------------------------------------------------------------------------------------------------------------------------------------------------------------------------------------------------------------------------------------------------------------------------------------------------------------------------------------------------------|
| 39 | 388 | 25744 | 0.0589 | H-10( $\beta$ ) $\rightarrow$ L( $\beta$ ) (30%), H-13( $\beta$ ) $\rightarrow$ L( $\beta$ ) (18%),<br>H-8( $\beta$ ) $\rightarrow$ L( $\beta$ ) (9%), H-13( $\alpha$ ) $\rightarrow$ L( $\alpha$ ) (8%),<br>H-14( $\alpha$ ) $\rightarrow$ L( $\alpha$ ) (7%), H-1( $\alpha$ ) $\rightarrow$ L+1( $\alpha$ ) (4%),<br>H-9( $\alpha$ ) $\rightarrow$ L( $\alpha$ ) (4%), H-12( $\beta$ ) $\rightarrow$ L( $\beta$ ) (3%),<br>H-12( $\alpha$ ) $\rightarrow$ L( $\alpha$ ) (3%), H-8( $\alpha$ ) $\rightarrow$ L( $\alpha$ ) (2%),<br>H-11( $\alpha$ ) $\rightarrow$ L( $\alpha$ ) (2%), H-10( $\alpha$ ) $\rightarrow$ L( $\alpha$ ) (2%),<br>H-15( $\alpha$ ) $\rightarrow$ L( $\alpha$ ) (2%) |
| 40 | 383 | 26077 | 0.0643 | H-15( $\alpha$ ) $\rightarrow$ L( $\alpha$ ) (36%), H-13( $\alpha$ ) $\rightarrow$ L( $\alpha$ ) (18%),<br>H-12( $\beta$ ) $\rightarrow$ L( $\beta$ ) (14%), H-10( $\alpha$ ) $\rightarrow$ L( $\alpha$ ) (7%),<br>H-10( $\beta$ ) $\rightarrow$ L( $\beta$ ) (4%), H-9( $\beta$ ) $\rightarrow$ L( $\beta$ ) (4%),<br>H-15( $\beta$ ) $\rightarrow$ L( $\beta$ ) (3%), H-12( $\alpha$ ) $\rightarrow$ L( $\alpha$ ) (3%),<br>H-14( $\beta$ ) $\rightarrow$ L( $\beta$ ) (2%)                                                                                                                                                                                                                   |
| 41 | 379 | 26386 | 0.1384 | H-2( $\alpha$ ) $\rightarrow$ L+1( $\alpha$ ) (34%),<br>H-11( $\beta$ ) $\rightarrow$ L( $\beta$ ) (9%), H-9( $\beta$ ) $\rightarrow$ L( $\beta$ ) (7%),<br>H-10( $\alpha$ ) $\rightarrow$ L( $\alpha$ ) (7%), H-15( $\beta$ ) $\rightarrow$ L( $\beta$ ) (7%),<br>H-3( $\alpha$ ) $\rightarrow$ L+1( $\alpha$ ) (6%),<br>H-4( $\beta$ ) $\rightarrow$ L+1( $\beta$ ) (3%), H-1( $\beta$ ) $\rightarrow$ L+1( $\beta$ ) (3%),<br>H-16( $\alpha$ ) $\rightarrow$ L( $\alpha$ ) (2%),<br>H-2( $\beta$ ) $\rightarrow$ L+1( $\beta$ ) (2%), H-7( $\beta$ ) $\rightarrow$ L( $\beta$ ) (2%),<br>H-12( $\beta$ ) $\rightarrow$ L( $\beta$ ) (2%), H-3( $\beta$ ) $\rightarrow$ L+2( $\beta$ ) (2%)   |
| 43 | 377 | 26542 | 0.1567 | H-2( $\alpha$ ) $\rightarrow$ L+1( $\alpha$ ) (28%),<br>H-10( $\alpha$ ) $\rightarrow$ L( $\alpha$ ) (16%), H-11( $\beta$ ) $\rightarrow$ L( $\beta$ ) (16%),<br>H-15( $\beta$ ) $\rightarrow$ L( $\beta$ ) (6%), H-1( $\beta$ ) $\rightarrow$ L+1( $\beta$ ) (6%),<br>H-9( $\beta$ ) $\rightarrow$ L( $\beta$ ) (4%), H-9( $\alpha$ ) $\rightarrow$ L( $\alpha$ ) (3%),<br>H-16( $\alpha$ ) $\rightarrow$ L( $\alpha$ ) (2%), H-13( $\alpha$ ) $\rightarrow$ L( $\alpha$ ) (2%),<br>H-12( $\beta$ ) $\rightarrow$ L( $\beta$ ) (2%)                                                                                                                                                            |
| 45 | 369 | 27112 | 0.0635 | H-11( $\beta$ ) $\rightarrow$ L( $\beta$ ) (21%), H-4( $\beta$ ) $\rightarrow$ L+1( $\beta$ ) (13%),<br>H-3( $\alpha$ ) $\rightarrow$ L+1( $\alpha$ ) (10%), H-15( $\beta$ ) $\rightarrow$ L( $\beta$ ) (7%),<br>H-13( $\alpha$ ) $\rightarrow$ L( $\alpha$ ) (6%), H-15( $\alpha$ ) $\rightarrow$ L( $\alpha$ ) (6%),<br>H-2( $\alpha$ ) $\rightarrow$ L+1( $\alpha$ ) (5%), H-11( $\alpha$ ) $\rightarrow$ L( $\alpha$ ) (4%),<br>H-14( $\alpha$ ) $\rightarrow$ L( $\alpha$ ) (4%), H-12( $\beta$ ) $\rightarrow$ L( $\beta$ ) (4%),<br>H-4( $\alpha$ ) $\rightarrow$ L+1( $\alpha$ ) (3%)                                                                                                   |
| 46 | 366 | 27303 | 0.0674 | H-3( $\alpha$ ) $\rightarrow$ L+1( $\alpha$ ) (49%),<br>H-2( $\beta$ ) $\rightarrow$ L+1( $\beta$ ) (10%),<br>H-15( $\beta$ ) $\rightarrow$ L( $\beta$ ) (10%), H-11( $\beta$ ) $\rightarrow$ L( $\beta$ ) (4%),<br>H-2( $\alpha$ ) $\rightarrow$ L+1( $\alpha$ ) (3%), H-15( $\alpha$ ) $\rightarrow$ L( $\alpha$ ) (2%)                                                                                                                                                                                                                                                                                                                                                                       |
| 48 | 362 | 27590 | 0.0286 | H-3( $\beta$ ) $\rightarrow$ L+1( $\beta$ ) (86%), H-4( $\beta$ ) $\rightarrow$ L+1( $\beta$ ) (5%),<br>H-4( $\alpha$ ) $\rightarrow$ L+1( $\alpha$ ) (2%)                                                                                                                                                                                                                                                                                                                                                                                                                                                                                                                                      |
| 49 | 359 | 27828 | 0.0230 | H-14( $\beta$ ) $\rightarrow$ L( $\beta$ ) (26%), H-11( $\alpha$ ) $\rightarrow$ L( $\alpha$ ) (18%),<br>H-13( $\alpha$ ) $\rightarrow$ L( $\alpha$ ) (15%), H-13( $\beta$ ) $\rightarrow$ L( $\beta$ ) (11%),<br>H-12( $\alpha$ ) $\rightarrow$ L( $\alpha$ ) (9%), H-12( $\beta$ ) $\rightarrow$ L( $\beta$ ) (6%),<br>H-3( $\beta$ ) $\rightarrow$ L+1( $\beta$ ) (3%), H-17( $\beta$ ) $\rightarrow$ L( $\beta$ ) (2%),<br>H-4( $\alpha$ ) $\rightarrow$ L+1( $\alpha$ ) (2%)                                                                                                                                                                                                               |
| 50 | 358 | 27968 | 0.0530 | H-12( $\alpha$ ) $\rightarrow$ L( $\alpha$ ) (33%), H-14( $\beta$ ) $\rightarrow$ L( $\beta$ ) (17%),<br>H-13( $\beta$ ) $\rightarrow$ L( $\beta$ ) (11%), H-15( $\beta$ ) $\rightarrow$ L( $\beta$ ) (8%),<br>H-4( $\alpha$ ) $\rightarrow$ L+1( $\alpha$ ) (7%), H-11( $\alpha$ ) $\rightarrow$ L( $\alpha$ ) (4%),                                                                                                                                                                                                                                                                                                                                                                           |

|    |     |       |        |                                                                                                                                                                                                                                                                                                                                                                                                                                                                                                                                                                                                                                                                                                                                                           |
|----|-----|-------|--------|-----------------------------------------------------------------------------------------------------------------------------------------------------------------------------------------------------------------------------------------------------------------------------------------------------------------------------------------------------------------------------------------------------------------------------------------------------------------------------------------------------------------------------------------------------------------------------------------------------------------------------------------------------------------------------------------------------------------------------------------------------------|
| 51 | 354 | 28271 | 0.0739 | H-3( $\alpha$ ) $\rightarrow$ L+1( $\alpha$ ) (4%), H-13( $\alpha$ ) $\rightarrow$ L( $\alpha$ ) (2%),<br>H-15( $\alpha$ ) $\rightarrow$ L( $\alpha$ ) (2%)<br>H-14( $\alpha$ ) $\rightarrow$ L( $\alpha$ ) (31%), H-13( $\beta$ ) $\rightarrow$ L( $\beta$ ) (11%),<br>H-13( $\alpha$ ) $\rightarrow$ L( $\alpha$ ) (10%), H-17( $\beta$ ) $\rightarrow$ L( $\beta$ ) (7%),<br>H-15( $\beta$ ) $\rightarrow$ L( $\beta$ ) (6%), H-15( $\alpha$ ) $\rightarrow$ L( $\alpha$ ) (6%),<br>H-16( $\alpha$ ) $\rightarrow$ L( $\alpha$ ) (6%), H-11( $\alpha$ ) $\rightarrow$ L( $\alpha$ ) (4%),<br>H-4( $\alpha$ ) $\rightarrow$ L+1( $\alpha$ ) (4%), H-14( $\beta$ ) $\rightarrow$ L( $\beta$ ) (2%),<br>H-18( $\alpha$ ) $\rightarrow$ L( $\alpha$ ) (2%) |
| 53 | 349 | 28647 | 0.0680 | H-5( $\beta$ ) $\rightarrow$ L+1( $\beta$ ) (24%),<br>H-4( $\alpha$ ) $\rightarrow$ L+1( $\alpha$ ) (18%),<br>H-6( $\alpha$ ) $\rightarrow$ L+1( $\alpha$ ) (7%), H-4( $\beta$ ) $\rightarrow$ L+1( $\beta$ ) (7%),<br>H-16( $\alpha$ ) $\rightarrow$ L( $\alpha$ ) (5%), H-6( $\beta$ ) $\rightarrow$ L+1( $\beta$ ) (3%),<br>H-1( $\alpha$ ) $\rightarrow$ L+1( $\alpha$ ) (3%), H-5( $\beta$ ) $\rightarrow$ L+7( $\beta$ ) (2%)                                                                                                                                                                                                                                                                                                                       |
| 56 | 345 | 29012 | 0.0716 | H-4( $\alpha$ ) $\rightarrow$ L+1( $\alpha$ ) (20%),<br>H-4( $\beta$ ) $\rightarrow$ L+1( $\beta$ ) (17%),<br>H-6( $\alpha$ ) $\rightarrow$ L+1( $\alpha$ ) (14%), H-5( $\beta$ ) $\rightarrow$ L+1( $\beta$ ) (6%),<br>H-6( $\beta$ ) $\rightarrow$ L+1( $\beta$ ) (5%), H-3( $\alpha$ ) $\rightarrow$ L+1( $\alpha$ ) (2%),<br>H-13( $\beta$ ) $\rightarrow$ L( $\beta$ ) (2%), H-13( $\alpha$ ) $\rightarrow$ L( $\alpha$ ) (2%),<br>H-1( $\alpha$ ) $\rightarrow$ L+1( $\alpha$ ) (2%)                                                                                                                                                                                                                                                                |
| 57 | 341 | 29304 | 0.0592 | H( $\alpha$ ) $\rightarrow$ L+2( $\alpha$ ) (36%), H-5( $\alpha$ ) $\rightarrow$ L+1( $\alpha$ ) (21%),<br>H-2( $\alpha$ ) $\rightarrow$ L+2( $\alpha$ ) (16%), H-5( $\alpha$ ) $\rightarrow$ L+2( $\alpha$ ) (6%),<br>H-14( $\alpha$ ) $\rightarrow$ L+2( $\alpha$ ) (2%), H-3( $\alpha$ ) $\rightarrow$ L+2( $\alpha$ ) (2%),<br>H-2( $\beta$ ) $\rightarrow$ L+1( $\beta$ ) (2%)                                                                                                                                                                                                                                                                                                                                                                       |
| 67 | 314 | 31884 | 0.0288 | H-7( $\alpha$ ) $\rightarrow$ L+1( $\alpha$ ) (28%),<br>H-6( $\beta$ ) $\rightarrow$ L+1( $\beta$ ) (26%),<br>H-7( $\beta$ ) $\rightarrow$ L+1( $\beta$ ) (21%), H-16( $\beta$ ) $\rightarrow$ L( $\beta$ ) (4%),<br>H-1( $\alpha$ ) $\rightarrow$ L+2( $\alpha$ ) (2%)                                                                                                                                                                                                                                                                                                                                                                                                                                                                                   |
| 68 | 312 | 32089 | 0.0341 | H( $\beta$ ) $\rightarrow$ L+2( $\beta$ ) (13%), H( $\beta$ ) $\rightarrow$ L+3( $\beta$ ) (9%),<br>H-7( $\alpha$ ) $\rightarrow$ L+1( $\alpha$ ) (7%), H-2( $\beta$ ) $\rightarrow$ L+2( $\beta$ ) (6%),<br>H-7( $\beta$ ) $\rightarrow$ L+1( $\beta$ ) (5%), H-9( $\beta$ ) $\rightarrow$ L+1( $\beta$ ) (4%),<br>H-11( $\beta$ ) $\rightarrow$ L+1( $\beta$ ) (3%), H-8( $\beta$ ) $\rightarrow$ L+1( $\beta$ ) (3%),<br>H-1( $\beta$ ) $\rightarrow$ L+2( $\beta$ ) (2%), H-12( $\beta$ ) $\rightarrow$ L+1( $\beta$ ) (2%),<br>H-6( $\alpha$ ) $\rightarrow$ L+1( $\alpha$ ) (2%), H-11( $\alpha$ ) $\rightarrow$ L+1( $\alpha$ ) (2%),<br>H( $\beta$ ) $\rightarrow$ L+5( $\beta$ ) (2%)                                                            |
| 72 | 307 | 32521 | 0.0384 | H-1( $\beta$ ) $\rightarrow$ L+2( $\beta$ ) (24%), H( $\alpha$ ) $\rightarrow$ L+3( $\alpha$ ) (19%),<br>H( $\beta$ ) $\rightarrow$ L+2( $\beta$ ) (10%), H-1( $\alpha$ ) $\rightarrow$ L+2( $\alpha$ ) (7%),<br>H-4( $\alpha$ ) $\rightarrow$ L+2( $\alpha$ ) (3%), H-10( $\beta$ ) $\rightarrow$ L+1( $\beta$ ) (3%),<br>H-2( $\beta$ ) $\rightarrow$ L+3( $\beta$ ) (2%), H-7( $\beta$ ) $\rightarrow$ L+1( $\beta$ ) (2%),<br>H-9( $\alpha$ ) $\rightarrow$ L+1( $\alpha$ ) (2%)                                                                                                                                                                                                                                                                      |

### Co\_1TA\_TD70

| <i>Excited State</i> | <i>Wavelength (nm)</i> | <i>Energy (cm<sup>-1</sup>)</i> | <i>Oscillator Strength, f</i> | <i>% Contributions</i>                                                                                                                                                                                  |
|----------------------|------------------------|---------------------------------|-------------------------------|---------------------------------------------------------------------------------------------------------------------------------------------------------------------------------------------------------|
| 8                    | 722                    | 13847                           | 0.0479                        | H-2( $\beta$ ) $\rightarrow$ L( $\beta$ ) (29%), H-1( $\beta$ ) $\rightarrow$ L( $\beta$ ) (14%),<br>H( $\alpha$ ) $\rightarrow$ L( $\alpha$ ) (12%), H( $\alpha$ ) $\rightarrow$ L+2( $\alpha$ ) (8%), |

|    |     |       |        |                                                                                                                                                                                                                                                                                                                                                                                                                                                                                                                                                                                                                                                                                                                                                                                                                                                                                                                                                            |
|----|-----|-------|--------|------------------------------------------------------------------------------------------------------------------------------------------------------------------------------------------------------------------------------------------------------------------------------------------------------------------------------------------------------------------------------------------------------------------------------------------------------------------------------------------------------------------------------------------------------------------------------------------------------------------------------------------------------------------------------------------------------------------------------------------------------------------------------------------------------------------------------------------------------------------------------------------------------------------------------------------------------------|
| 9  | 680 | 14702 | 0.0252 | H-2( $\alpha$ ) $\rightarrow$ L+2( $\alpha$ ) (7%), H-1( $\alpha$ ) $\rightarrow$ L( $\alpha$ ) (5%),<br>H( $\beta$ ) $\rightarrow$ L( $\beta$ ) (4%), H-5( $\alpha$ ) $\rightarrow$ L+2( $\alpha$ ) (4%),<br>H-19( $\alpha$ ) $\rightarrow$ L+2( $\alpha$ ) (3%), H-15( $\alpha$ ) $\rightarrow$ L+2( $\alpha$ ) (2%)<br>H( $\alpha$ ) $\rightarrow$ L+2( $\alpha$ ) (19%), H-2( $\alpha$ ) $\rightarrow$ L+2( $\alpha$ ) (15%),<br>H-2( $\beta$ ) $\rightarrow$ L( $\beta$ ) (10%), H-1( $\beta$ ) $\rightarrow$ L( $\beta$ ) (8%),<br>H-5( $\alpha$ ) $\rightarrow$ L+2( $\alpha$ ) (8%), H( $\alpha$ ) $\rightarrow$ L( $\alpha$ ) (7%),<br>H-19( $\alpha$ ) $\rightarrow$ L+2( $\alpha$ ) (5%),<br>H-15( $\alpha$ ) $\rightarrow$ L+2( $\alpha$ ) (4%),<br>H( $\beta$ ) $\rightarrow$ L( $\beta$ ) (3%), H-3( $\alpha$ ) $\rightarrow$ L+2( $\alpha$ ) (3%),<br>H-3( $\alpha$ ) $\rightarrow$ L( $\alpha$ ) (2%)                                      |
| 10 | 649 | 15415 | 0.0831 | H-2( $\beta$ ) $\rightarrow$ L( $\beta$ ) (23%), H-1( $\beta$ ) $\rightarrow$ L( $\beta$ ) (23%),<br>H( $\alpha$ ) $\rightarrow$ L( $\alpha$ ) (18%), H-1( $\alpha$ ) $\rightarrow$ L( $\alpha$ ) (14%),<br>H-2( $\alpha$ ) $\rightarrow$ L( $\alpha$ ) (11%), H-5( $\alpha$ ) $\rightarrow$ L( $\alpha$ ) (2%)                                                                                                                                                                                                                                                                                                                                                                                                                                                                                                                                                                                                                                            |
| 11 | 627 | 15946 | 0.0887 | H-1( $\alpha$ ) $\rightarrow$ L( $\alpha$ ) (38%), H-2( $\beta$ ) $\rightarrow$ L( $\beta$ ) (18%),<br>H( $\beta$ ) $\rightarrow$ L( $\beta$ ) (10%), H-3( $\beta$ ) $\rightarrow$ L( $\beta$ ) (7%),<br>H-4( $\beta$ ) $\rightarrow$ L( $\beta$ ) (4%), H-2( $\alpha$ ) $\rightarrow$ L( $\alpha$ ) (3%),<br>H-6( $\alpha$ ) $\rightarrow$ L( $\alpha$ ) (3%), H( $\alpha$ ) $\rightarrow$ L+1( $\alpha$ ) (2%)                                                                                                                                                                                                                                                                                                                                                                                                                                                                                                                                           |
| 12 | 588 | 17004 | 0.0299 | H-3( $\alpha$ ) $\rightarrow$ L( $\alpha$ ) (47%), H-2( $\alpha$ ) $\rightarrow$ L( $\alpha$ ) (10%),<br>H-3( $\beta$ ) $\rightarrow$ L( $\beta$ ) (9%), H-4( $\beta$ ) $\rightarrow$ L( $\beta$ ) (8%),<br>H-4( $\alpha$ ) $\rightarrow$ L( $\alpha$ ) (6%), H-1( $\alpha$ ) $\rightarrow$ L( $\alpha$ ) (3%),<br>H-6( $\alpha$ ) $\rightarrow$ L( $\alpha$ ) (3%), H( $\alpha$ ) $\rightarrow$ L+1( $\alpha$ ) (2%)                                                                                                                                                                                                                                                                                                                                                                                                                                                                                                                                      |
| 14 | 561 | 17822 | 0.0768 | H-2( $\alpha$ ) $\rightarrow$ L( $\alpha$ ) (61%), H-3( $\alpha$ ) $\rightarrow$ L( $\alpha$ ) (11%),<br>H-2( $\beta$ ) $\rightarrow$ L( $\beta$ ) (9%), H-1( $\beta$ ) $\rightarrow$ L( $\beta$ ) (6%),<br>H( $\alpha$ ) $\rightarrow$ L( $\alpha$ ) (3%), H-3( $\beta$ ) $\rightarrow$ L( $\beta$ ) (2%)                                                                                                                                                                                                                                                                                                                                                                                                                                                                                                                                                                                                                                                 |
| 15 | 558 | 17916 | 0.1041 | H-3( $\alpha$ ) $\rightarrow$ L( $\alpha$ ) (26%), H-4( $\alpha$ ) $\rightarrow$ L( $\alpha$ ) (16%),<br>H-3( $\beta$ ) $\rightarrow$ L( $\beta$ ) (15%), H-1( $\alpha$ ) $\rightarrow$ L( $\alpha$ ) (9%),<br>H-7( $\alpha$ ) $\rightarrow$ L( $\alpha$ ) (5%), H-4( $\beta$ ) $\rightarrow$ L( $\beta$ ) (4%),<br>H-2( $\alpha$ ) $\rightarrow$ L( $\alpha$ ) (4%), H-1( $\beta$ ) $\rightarrow$ L( $\beta$ ) (2%),<br>H-5( $\beta$ ) $\rightarrow$ L( $\beta$ ) (2%), H-2( $\beta$ ) $\rightarrow$ L( $\beta$ ) (2%)                                                                                                                                                                                                                                                                                                                                                                                                                                    |
| 19 | 509 | 19665 | 0.1215 | H-5( $\alpha$ ) $\rightarrow$ L( $\alpha$ ) (19%), H-4( $\alpha$ ) $\rightarrow$ L( $\alpha$ ) (11%),<br>H-4( $\beta$ ) $\rightarrow$ L( $\beta$ ) (6%), H-5( $\beta$ ) $\rightarrow$ L( $\beta$ ) (5%),<br>H-8( $\beta$ ) $\rightarrow$ L+3( $\beta$ ) (5%), H-8( $\beta$ ) $\rightarrow$ L+6( $\beta$ ) (4%),<br>H-3( $\alpha$ ) $\rightarrow$ L+2( $\alpha$ ) (3%), H-17( $\alpha$ ) $\rightarrow$ L+2( $\alpha$ ) (3%),<br>H-14( $\alpha$ ) $\rightarrow$ L+2( $\alpha$ ) (3%), H( $\beta$ ) $\rightarrow$ L+1( $\beta$ ) (3%),<br>H-2( $\beta$ ) $\rightarrow$ L+6( $\beta$ ) (3%), H-1( $\alpha$ ) $\rightarrow$ L( $\alpha$ ) (2%),<br>H-5( $\beta$ ) $\rightarrow$ L+6( $\beta$ ) (2%), H-5( $\beta$ ) $\rightarrow$ L+3( $\beta$ ) (2%),<br>H( $\beta$ ) $\rightarrow$ L+6( $\beta$ ) (2%), H-6( $\alpha$ ) $\rightarrow$ L+2( $\alpha$ ) (2%),<br>H( $\beta$ ) $\rightarrow$ L( $\beta$ ) (2%), H-2( $\alpha$ ) $\rightarrow$ L( $\alpha$ ) (2%) |
| 21 | 489 | 20460 | 0.0210 | H-4( $\alpha$ ) $\rightarrow$ L( $\alpha$ ) (12%), H-8( $\beta$ ) $\rightarrow$ L+6( $\beta$ ) (6%),<br>H-7( $\alpha$ ) $\rightarrow$ L( $\alpha$ ) (5%), H-6( $\beta$ ) $\rightarrow$ L( $\beta$ ) (5%),<br>H-5( $\beta$ ) $\rightarrow$ L( $\beta$ ) (4%), H-16( $\alpha$ ) $\rightarrow$ L+2( $\alpha$ ) (4%),<br>H-14( $\alpha$ ) $\rightarrow$ L+2( $\alpha$ ) (3%), H-7( $\alpha$ ) $\rightarrow$ L+2( $\alpha$ ) (3%),<br>H-5( $\beta$ ) $\rightarrow$ L+6( $\beta$ ) (3%), H-7( $\beta$ ) $\rightarrow$ L( $\beta$ ) (3%),<br>H-17( $\alpha$ ) $\rightarrow$ L+2( $\alpha$ ) (3%), H-1( $\beta$ ) $\rightarrow$ L+6( $\beta$ ) (2%),<br>H-6( $\alpha$ ) $\rightarrow$ L( $\alpha$ ) (2%), H-4( $\alpha$ ) $\rightarrow$ L+2( $\alpha$ ) (2%)                                                                                                                                                                                                       |
| 22 | 487 | 20544 | 0.2231 | H-3( $\beta$ ) $\rightarrow$ L( $\beta$ ) (17%), H-4( $\beta$ ) $\rightarrow$ L( $\beta$ ) (15%),                                                                                                                                                                                                                                                                                                                                                                                                                                                                                                                                                                                                                                                                                                                                                                                                                                                          |



|    |     |       |        |                                                                                                                                                                                                                                                                                                                                                                                                                                                                                                                                                                                                                                                                                                                                                                                                                                                                                                                                                                                                    |
|----|-----|-------|--------|----------------------------------------------------------------------------------------------------------------------------------------------------------------------------------------------------------------------------------------------------------------------------------------------------------------------------------------------------------------------------------------------------------------------------------------------------------------------------------------------------------------------------------------------------------------------------------------------------------------------------------------------------------------------------------------------------------------------------------------------------------------------------------------------------------------------------------------------------------------------------------------------------------------------------------------------------------------------------------------------------|
| 23 | 476 | 21010 | 0.0300 | H-4( $\alpha$ ) $\rightarrow$ L( $\alpha$ ) (14%), H-7( $\alpha$ ) $\rightarrow$ L( $\alpha$ ) (11%),<br>H-5( $\beta$ ) $\rightarrow$ L( $\beta$ ) (8%), H-6( $\alpha$ ) $\rightarrow$ L( $\alpha$ ) (6%),<br>H-6( $\beta$ ) $\rightarrow$ L( $\beta$ ) (5%), H-7( $\beta$ ) $\rightarrow$ L( $\beta$ ) (4%),<br>H-8( $\alpha$ ) $\rightarrow$ L( $\alpha$ ) (3%), H-1( $\alpha$ ) $\rightarrow$ L( $\alpha$ ) (2%)<br>H-5( $\beta$ ) $\rightarrow$ L( $\beta$ ) (23%), H-6( $\beta$ ) $\rightarrow$ L( $\beta$ ) (13%),<br>H-7( $\beta$ ) $\rightarrow$ L( $\beta$ ) (9%), H-7( $\alpha$ ) $\rightarrow$ L( $\alpha$ ) (7%),<br>H-4( $\alpha$ ) $\rightarrow$ L( $\alpha$ ) (7%), H-6( $\alpha$ ) $\rightarrow$ L( $\alpha$ ) (5%),<br>H( $\beta$ ) $\rightarrow$ L+1( $\beta$ ) (4%), H-8( $\alpha$ ) $\rightarrow$ L( $\alpha$ ) (3%),<br>H( $\alpha$ ) $\rightarrow$ L+1( $\alpha$ ) (2%), H-8( $\beta$ ) $\rightarrow$ L( $\beta$ ) (2%),<br>H-5( $\alpha$ ) $\rightarrow$ L( $\alpha$ ) (2%) |
| 24 | 469 | 21342 | 0.0225 | H( $\beta$ ) $\rightarrow$ L+1( $\beta$ ) (28%), H-6( $\alpha$ ) $\rightarrow$ L( $\alpha$ ) (14%),<br>H-6( $\beta$ ) $\rightarrow$ L( $\beta$ ) (11%), H-7( $\beta$ ) $\rightarrow$ L( $\beta$ ) (7%),<br>H-8( $\beta$ ) $\rightarrow$ L( $\beta$ ) (4%), H( $\alpha$ ) $\rightarrow$ L+1( $\alpha$ ) (4%),<br>H-5( $\beta$ ) $\rightarrow$ L( $\beta$ ) (4%), H-4( $\alpha$ ) $\rightarrow$ L( $\alpha$ ) (2%),<br>H-10( $\beta$ ) $\rightarrow$ L( $\beta$ ) (2%), H-1( $\alpha$ ) $\rightarrow$ L+1( $\alpha$ ) (2%),<br>H-3( $\beta$ ) $\rightarrow$ L( $\beta$ ) (2%), H-4( $\beta$ ) $\rightarrow$ L( $\beta$ ) (2%),<br>H-8( $\alpha$ ) $\rightarrow$ L( $\alpha$ ) (2%), H-9( $\beta$ ) $\rightarrow$ L( $\beta$ ) (2%)                                                                                                                                                                                                                                                                   |
| 30 | 430 | 23255 | 0.0265 | H-8( $\beta$ ) $\rightarrow$ L( $\beta$ ) (24%), H-9( $\alpha$ ) $\rightarrow$ L( $\alpha$ ) (11%),<br>H-10( $\beta$ ) $\rightarrow$ L( $\beta$ ) (10%), H-7( $\beta$ ) $\rightarrow$ L( $\beta$ ) (8%),<br>H( $\beta$ ) $\rightarrow$ L+1( $\beta$ ) (8%), H-8( $\alpha$ ) $\rightarrow$ L( $\alpha$ ) (5%),<br>H-10( $\alpha$ ) $\rightarrow$ L( $\alpha$ ) (5%), H-6( $\beta$ ) $\rightarrow$ L( $\beta$ ) (3%),<br>H-7( $\alpha$ ) $\rightarrow$ L( $\alpha$ ) (3%), H-11( $\beta$ ) $\rightarrow$ L( $\beta$ ) (2%),<br>H-14( $\beta$ ) $\rightarrow$ L( $\beta$ ) (2%), H-11( $\alpha$ ) $\rightarrow$ L( $\alpha$ ) (2%)                                                                                                                                                                                                                                                                                                                                                                    |
| 32 | 422 | 23701 | 0.0419 | H-9( $\beta$ ) $\rightarrow$ L( $\beta$ ) (17%), H-8( $\alpha$ ) $\rightarrow$ L( $\alpha$ ) (11%),<br>H-2( $\beta$ ) $\rightarrow$ L+1( $\beta$ ) (9%), H-12( $\beta$ ) $\rightarrow$ L( $\beta$ ) (8%),<br>H-1( $\alpha$ ) $\rightarrow$ L+1( $\alpha$ ) (7%), H-1( $\beta$ ) $\rightarrow$ L+1( $\beta$ ) (7%),<br>H( $\alpha$ ) $\rightarrow$ L+1( $\alpha$ ) (6%), H-8( $\beta$ ) $\rightarrow$ L( $\beta$ ) (6%),<br>H-14( $\beta$ ) $\rightarrow$ L( $\beta$ ) (3%), H-11( $\alpha$ ) $\rightarrow$ L( $\alpha$ ) (3%),<br>H-10( $\beta$ ) $\rightarrow$ L( $\beta$ ) (3%), H-13( $\beta$ ) $\rightarrow$ L( $\beta$ ) (2%)                                                                                                                                                                                                                                                                                                                                                                 |
| 33 | 412 | 24276 | 0.2020 | H-1( $\beta$ ) $\rightarrow$ L+1( $\beta$ ) (30%), H( $\alpha$ ) $\rightarrow$ L+1( $\alpha$ ) (22%),<br>H-9( $\beta$ ) $\rightarrow$ L( $\beta$ ) (10%), H-2( $\beta$ ) $\rightarrow$ L+1( $\beta$ ) (4%),<br>H-8( $\alpha$ ) $\rightarrow$ L( $\alpha$ ) (3%), H-7( $\beta$ ) $\rightarrow$ L( $\beta$ ) (3%),<br>H-1( $\alpha$ ) $\rightarrow$ L+1( $\alpha$ ) (2%), H-2( $\alpha$ ) $\rightarrow$ L+1( $\alpha$ ) (2%),<br>H-11( $\beta$ ) $\rightarrow$ L( $\beta$ ) (2%), H-9( $\alpha$ ) $\rightarrow$ L( $\alpha$ ) (2%),<br>H-14( $\beta$ ) $\rightarrow$ L( $\beta$ ) (2%)                                                                                                                                                                                                                                                                                                                                                                                                               |
| 35 | 405 | 24680 | 0.0524 | H-1( $\alpha$ ) $\rightarrow$ L+1( $\alpha$ ) (31%), H-9( $\beta$ ) $\rightarrow$ L( $\beta$ ) (21%),<br>H-11( $\alpha$ ) $\rightarrow$ L( $\alpha$ ) (8%), H-14( $\beta$ ) $\rightarrow$ L( $\beta$ ) (4%),<br>H-12( $\beta$ ) $\rightarrow$ L( $\beta$ ) (4%), H-12( $\alpha$ ) $\rightarrow$ L( $\alpha$ ) (4%),<br>H-1( $\beta$ ) $\rightarrow$ L+1( $\beta$ ) (2%), H( $\beta$ ) $\rightarrow$ L+1( $\beta$ ) (2%),<br>H-11( $\beta$ ) $\rightarrow$ L( $\beta$ ) (2%), H-8( $\beta$ ) $\rightarrow$ L( $\beta$ ) (2%),<br>H-3( $\beta$ ) $\rightarrow$ L+1( $\beta$ ) (2%)                                                                                                                                                                                                                                                                                                                                                                                                                   |
| 36 | 402 | 24905 | 0.0405 | H-2( $\beta$ ) $\rightarrow$ L+1( $\beta$ ) (21%), H-12( $\beta$ ) $\rightarrow$ L( $\beta$ ) (19%),<br>H-11( $\alpha$ ) $\rightarrow$ L( $\alpha$ ) (18%), H-13( $\beta$ ) $\rightarrow$ L( $\beta$ ) (5%),<br>H( $\alpha$ ) $\rightarrow$ L+1( $\alpha$ ) (5%), H-2( $\alpha$ ) $\rightarrow$ L+1( $\alpha$ ) (5%),<br>H-12( $\alpha$ ) $\rightarrow$ L( $\alpha$ ) (4%), H-1( $\alpha$ ) $\rightarrow$ L+1( $\alpha$ ) (4%),<br>H-7( $\alpha$ ) $\rightarrow$ L( $\alpha$ ) (2%)                                                                                                                                                                                                                                                                                                                                                                                                                                                                                                                |

|    |     |       |        |                                                                                                                                                                                                                                                                                                                                                                                                                                                                                                                                                                                                                                                                                                                                              |
|----|-----|-------|--------|----------------------------------------------------------------------------------------------------------------------------------------------------------------------------------------------------------------------------------------------------------------------------------------------------------------------------------------------------------------------------------------------------------------------------------------------------------------------------------------------------------------------------------------------------------------------------------------------------------------------------------------------------------------------------------------------------------------------------------------------|
| 37 | 394 | 25381 | 0.0815 | H-12( $\alpha$ ) $\rightarrow$ L( $\alpha$ ) (23%), H-2( $\beta$ ) $\rightarrow$ L+1( $\beta$ ) (19%),<br>H-13( $\beta$ ) $\rightarrow$ L( $\beta$ ) (18%), H-1( $\beta$ ) $\rightarrow$ L+1( $\beta$ ) (5%),<br>H-11( $\beta$ ) $\rightarrow$ L( $\beta$ ) (4%), H-2( $\alpha$ ) $\rightarrow$ L+1( $\alpha$ ) (2%),<br>H-11( $\alpha$ ) $\rightarrow$ L( $\alpha$ ) (2%), H-15( $\beta$ ) $\rightarrow$ L( $\beta$ ) (2%),<br>H-14( $\alpha$ ) $\rightarrow$ L( $\alpha$ ) (2%), H-12( $\alpha$ ) $\rightarrow$ L( $\alpha$ ) (2%),<br>H-7( $\beta$ ) $\rightarrow$ L( $\beta$ ) (2%)                                                                                                                                                      |
| 38 | 390 | 25654 | 0.0859 | H-11( $\beta$ ) $\rightarrow$ L( $\beta$ ) (24%), H-14( $\beta$ ) $\rightarrow$ L( $\beta$ ) (11%),<br>H-15( $\beta$ ) $\rightarrow$ L( $\beta$ ) (8%), H-9( $\alpha$ ) $\rightarrow$ L( $\alpha$ ) (8%),<br>H-2( $\beta$ ) $\rightarrow$ L+1( $\beta$ ) (7%), H-7( $\beta$ ) $\rightarrow$ L( $\beta$ ) (4%),<br>H-8( $\beta$ ) $\rightarrow$ L( $\beta$ ) (4%), H-3( $\alpha$ ) $\rightarrow$ L+1( $\alpha$ ) (3%),<br>H-16( $\alpha$ ) $\rightarrow$ L( $\alpha$ ) (3%), H-13( $\beta$ ) $\rightarrow$ L( $\beta$ ) (2%),<br>H-11( $\alpha$ ) $\rightarrow$ L( $\alpha$ ) (2%), H-13( $\alpha$ ) $\rightarrow$ L( $\alpha$ ) (2%),<br>H-8( $\alpha$ ) $\rightarrow$ L( $\alpha$ ) (2%), H-10( $\alpha$ ) $\rightarrow$ L( $\alpha$ ) (2%) |
| 39 | 386 | 25891 | 0.3548 | H-10( $\beta$ ) $\rightarrow$ L( $\beta$ ) (43%), H-9( $\alpha$ ) $\rightarrow$ L( $\alpha$ ) (26%),<br>H-10( $\alpha$ ) $\rightarrow$ L( $\alpha$ ) (14%), H-13( $\alpha$ ) $\rightarrow$ L( $\alpha$ ) (3%),<br>H-9( $\beta$ ) $\rightarrow$ L( $\beta$ ) (3%), H-14( $\alpha$ ) $\rightarrow$ L( $\alpha$ ) (2%)                                                                                                                                                                                                                                                                                                                                                                                                                          |
| 40 | 383 | 26094 | 0.0574 | H-13( $\alpha$ ) $\rightarrow$ L( $\alpha$ ) (23%), H-9( $\beta$ ) $\rightarrow$ L( $\beta$ ) (13%),<br>H-14( $\alpha$ ) $\rightarrow$ L( $\alpha$ ) (13%), H-15( $\alpha$ ) $\rightarrow$ L( $\alpha$ ) (11%),<br>H-9( $\alpha$ ) $\rightarrow$ L( $\alpha$ ) (8%), H-14( $\beta$ ) $\rightarrow$ L( $\beta$ ) (4%),<br>H-10( $\alpha$ ) $\rightarrow$ L( $\alpha$ ) (3%), H-12( $\beta$ ) $\rightarrow$ L( $\beta$ ) (3%),<br>H-13( $\beta$ ) $\rightarrow$ L( $\beta$ ) (3%), H-15( $\beta$ ) $\rightarrow$ L( $\beta$ ) (2%),<br>H-16( $\beta$ ) $\rightarrow$ L( $\beta$ ) (2%), H-11( $\beta$ ) $\rightarrow$ L( $\beta$ ) (2%)                                                                                                        |
| 42 | 374 | 26714 | 0.1343 | H-2( $\alpha$ ) $\rightarrow$ L+1( $\alpha$ ) (40%),<br>H-3( $\alpha$ ) $\rightarrow$ L+1( $\alpha$ ) (32%), H-1( $\beta$ ) $\rightarrow$ L+1( $\beta$ ) (6%),<br>H-4( $\beta$ ) $\rightarrow$ L+1( $\beta$ ) (5%), H-11( $\beta$ ) $\rightarrow$ L( $\beta$ ) (3%)                                                                                                                                                                                                                                                                                                                                                                                                                                                                          |
| 44 | 369 | 27091 | 0.1903 | H-3( $\alpha$ ) $\rightarrow$ L+1( $\alpha$ ) (42%),<br>H-2( $\alpha$ ) $\rightarrow$ L+1( $\alpha$ ) (28%),<br>H-2( $\beta$ ) $\rightarrow$ L+1( $\beta$ ) (11%),<br>H-12( $\beta$ ) $\rightarrow$ L( $\beta$ ) (2%), H-13( $\alpha$ ) $\rightarrow$ L( $\alpha$ ) (2%),<br>H-11( $\alpha$ ) $\rightarrow$ L( $\alpha$ ) (2%)                                                                                                                                                                                                                                                                                                                                                                                                               |
| 45 | 368 | 27138 | 0.0242 | H-12( $\beta$ ) $\rightarrow$ L( $\beta$ ) (23%), H-14( $\beta$ ) $\rightarrow$ L( $\beta$ ) (10%),<br>H-11( $\beta$ ) $\rightarrow$ L( $\beta$ ) (10%), H-11( $\alpha$ ) $\rightarrow$ L( $\alpha$ ) (9%),<br>H-13( $\alpha$ ) $\rightarrow$ L( $\alpha$ ) (7%), H-14( $\alpha$ ) $\rightarrow$ L( $\alpha$ ) (7%),<br>H-10( $\alpha$ ) $\rightarrow$ L( $\alpha$ ) (5%), H-16( $\alpha$ ) $\rightarrow$ L( $\alpha$ ) (5%),<br>H-3( $\alpha$ ) $\rightarrow$ L+1( $\alpha$ ) (4%), H-9( $\beta$ ) $\rightarrow$ L( $\beta$ ) (4%),<br>H-15( $\alpha$ ) $\rightarrow$ L( $\alpha$ ) (3%), H-13( $\beta$ ) $\rightarrow$ L( $\beta$ ) (2%),<br>H-2( $\alpha$ ) $\rightarrow$ L+1( $\alpha$ ) (2%)                                            |
| 46 | 365 | 27361 | 0.0256 | H-3( $\beta$ ) $\rightarrow$ L+1( $\beta$ ) (37%),<br>H-4( $\alpha$ ) $\rightarrow$ L+1( $\alpha$ ) (14%),<br>H-11( $\alpha$ ) $\rightarrow$ L( $\alpha$ ) (6%), H-4( $\beta$ ) $\rightarrow$ L+1( $\beta$ ) (6%),<br>H-11( $\beta$ ) $\rightarrow$ L( $\beta$ ) (4%), H-10( $\alpha$ ) $\rightarrow$ L( $\alpha$ ) (4%),<br>H-14( $\alpha$ ) $\rightarrow$ L( $\alpha$ ) (3%), H-2( $\alpha$ ) $\rightarrow$ L+1( $\alpha$ ) (3%),<br>H-1( $\alpha$ ) $\rightarrow$ L+1( $\alpha$ ) (2%)                                                                                                                                                                                                                                                    |
| 47 | 360 | 27753 | 0.0311 | H-4( $\beta$ ) $\rightarrow$ L+1( $\beta$ ) (52%),<br>H-3( $\beta$ ) $\rightarrow$ L+1( $\beta$ ) (27%),<br>H-11( $\alpha$ ) $\rightarrow$ L( $\alpha$ ) (3%), H-5( $\alpha$ ) $\rightarrow$ L+1( $\alpha$ ) (2%),                                                                                                                                                                                                                                                                                                                                                                                                                                                                                                                           |

|    |     |       |        |                                                                                                                                                                                                                                                                                                                                                                                                                                                                                                                                                                                                                                                                                                      |
|----|-----|-------|--------|------------------------------------------------------------------------------------------------------------------------------------------------------------------------------------------------------------------------------------------------------------------------------------------------------------------------------------------------------------------------------------------------------------------------------------------------------------------------------------------------------------------------------------------------------------------------------------------------------------------------------------------------------------------------------------------------------|
| 49 | 358 | 27961 | 0.0284 | H-14( $\beta$ ) $\rightarrow$ L( $\beta$ ) (2%), H-3( $\alpha$ ) $\rightarrow$ L+1( $\alpha$ ) (2%)<br>H-13( $\beta$ ) $\rightarrow$ L( $\beta$ ) (21%), H-12( $\alpha$ ) $\rightarrow$ L( $\alpha$ ) (19%),<br>H-11( $\alpha$ ) $\rightarrow$ L( $\alpha$ ) (18%), H-12( $\beta$ ) $\rightarrow$ L( $\beta$ ) (14%),<br>H-14( $\beta$ ) $\rightarrow$ L( $\beta$ ) (7%), H-13( $\alpha$ ) $\rightarrow$ L( $\alpha$ ) (5%),<br>H-4( $\beta$ ) $\rightarrow$ L+1( $\beta$ ) (4%), H-15( $\alpha$ ) $\rightarrow$ L( $\alpha$ ) (2%)                                                                                                                                                                  |
| 50 | 354 | 28256 | 0.1016 | H-13( $\beta$ ) $\rightarrow$ L( $\beta$ ) (22%), H-12( $\alpha$ ) $\rightarrow$ L( $\alpha$ ) (19%),<br>H-14( $\beta$ ) $\rightarrow$ L( $\beta$ ) (12%), H-4( $\alpha$ ) $\rightarrow$ L+1( $\alpha$ ) (9%),<br>H-13( $\alpha$ ) $\rightarrow$ L( $\alpha$ ) (8%), H-5( $\alpha$ ) $\rightarrow$ L+1( $\alpha$ ) (7%),<br>H-16( $\alpha$ ) $\rightarrow$ L( $\alpha$ ) (4%), H-12( $\beta$ ) $\rightarrow$ L( $\beta$ ) (4%),<br>H-12( $\alpha$ ) $\rightarrow$ L( $\alpha$ ) (3%), H-15( $\alpha$ ) $\rightarrow$ L( $\alpha$ ) (2%)                                                                                                                                                              |
| 51 | 351 | 28488 | 0.0526 | H-5( $\alpha$ ) $\rightarrow$ L+1( $\alpha$ ) (42%), H-17( $\beta$ ) $\rightarrow$ L( $\beta$ ) (12%),<br>H( $\alpha$ ) $\rightarrow$ L+2( $\alpha$ ) (5%), H-16( $\alpha$ ) $\rightarrow$ L( $\alpha$ ) (4%),<br>H-16( $\beta$ ) $\rightarrow$ L( $\beta$ ) (2%), H-17( $\alpha$ ) $\rightarrow$ L( $\alpha$ ) (2%),<br>H-14( $\alpha$ ) $\rightarrow$ L( $\alpha$ ) (2%), H-5( $\beta$ ) $\rightarrow$ L+1( $\beta$ ) (2%),<br>H-14( $\beta$ ) $\rightarrow$ L( $\beta$ ) (2%)                                                                                                                                                                                                                     |
| 53 | 349 | 28645 | 0.0337 | H-17( $\beta$ ) $\rightarrow$ L( $\beta$ ) (23%), H-5( $\beta$ ) $\rightarrow$ L+1( $\beta$ ) (12%),<br>H-17( $\alpha$ ) $\rightarrow$ L( $\alpha$ ) (6%), H-13( $\alpha$ ) $\rightarrow$ L( $\alpha$ ) (6%),<br>H-15( $\beta$ ) $\rightarrow$ L( $\beta$ ) (6%), H-4( $\alpha$ ) $\rightarrow$ L+1( $\alpha$ ) (5%),<br>H-16( $\beta$ ) $\rightarrow$ L( $\beta$ ) (4%), H-6( $\alpha$ ) $\rightarrow$ L+1( $\alpha$ ) (4%),<br>H-12( $\alpha$ ) $\rightarrow$ L( $\alpha$ ) (3%), H-16( $\alpha$ ) $\rightarrow$ L( $\alpha$ ) (3%),<br>H-5( $\alpha$ ) $\rightarrow$ L+1( $\alpha$ ) (3%), H-13( $\beta$ ) $\rightarrow$ L( $\beta$ ) (3%),<br>H-2( $\alpha$ ) $\rightarrow$ L+1( $\alpha$ ) (2%) |
| 55 | 344 | 29086 | 0.0936 | H-4( $\alpha$ ) $\rightarrow$ L+1( $\alpha$ ) (26%),<br>H-6( $\alpha$ ) $\rightarrow$ L+1( $\alpha$ ) (13%),<br>H-4( $\beta$ ) $\rightarrow$ L+1( $\beta$ ) (10%), H-3( $\beta$ ) $\rightarrow$ L+1( $\beta$ ) (8%),<br>H-6( $\beta$ ) $\rightarrow$ L+1( $\beta$ ) (6%), H-12( $\alpha$ ) $\rightarrow$ L( $\alpha$ ) (2%),<br>H-14( $\beta$ ) $\rightarrow$ L( $\beta$ ) (2%), H-5( $\beta$ ) $\rightarrow$ L+1( $\beta$ ) (2%),<br>H-1( $\alpha$ ) $\rightarrow$ L+1( $\alpha$ ) (2%)                                                                                                                                                                                                             |
| 56 | 341 | 29342 | 0.0435 | H( $\alpha$ ) $\rightarrow$ L+2( $\alpha$ ) (48%), H-2( $\alpha$ ) $\rightarrow$ L+2( $\alpha$ ) (16%),<br>H-5( $\alpha$ ) $\rightarrow$ L+1( $\alpha$ ) (7%), H-5( $\alpha$ ) $\rightarrow$ L+2( $\alpha$ ) (6%),<br>H-15( $\beta$ ) $\rightarrow$ L( $\beta$ ) (2%), H-16( $\alpha$ ) $\rightarrow$ L+2( $\alpha$ ) (2%),<br>H-15( $\alpha$ ) $\rightarrow$ L+2( $\alpha$ ) (2%)                                                                                                                                                                                                                                                                                                                   |
| 61 | 329 | 30398 | 0.0239 | H-17( $\alpha$ ) $\rightarrow$ L( $\alpha$ ) (26%), H( $\beta$ ) $\rightarrow$ L+2( $\beta$ ) (14%),<br>H-5( $\beta$ ) $\rightarrow$ L+1( $\beta$ ) (5%), H-17( $\beta$ ) $\rightarrow$ L( $\beta$ ) (5%),<br>H-1( $\alpha$ ) $\rightarrow$ L+3( $\alpha$ ) (4%), H-19( $\beta$ ) $\rightarrow$ L( $\beta$ ) (4%),<br>H-8( $\beta$ ) $\rightarrow$ L+1( $\beta$ ) (3%), H( $\alpha$ ) $\rightarrow$ L+3( $\alpha$ ) (2%),<br>H-18( $\alpha$ ) $\rightarrow$ L( $\alpha$ ) (2%), H( $\beta$ ) $\rightarrow$ L+4( $\beta$ ) (2%),<br>H-5( $\alpha$ ) $\rightarrow$ L+1( $\alpha$ ) (2%), H-6( $\alpha$ ) $\rightarrow$ L+1( $\alpha$ ) (2%)                                                            |
| 66 | 314 | 31798 | 0.0354 | H-6( $\beta$ ) $\rightarrow$ L+1( $\beta$ ) (33%),<br>H-7( $\alpha$ ) $\rightarrow$ L+1( $\alpha$ ) (29%),<br>H-7( $\beta$ ) $\rightarrow$ L+1( $\beta$ ) (14%), H-1( $\alpha$ ) $\rightarrow$ L+2( $\alpha$ ) (3%),<br>H-3( $\alpha$ ) $\rightarrow$ L+2( $\alpha$ ) (2%)                                                                                                                                                                                                                                                                                                                                                                                                                           |

## References

- (1) Tamgho, I.-S.; Engle, J. T.; Ziegler, C. J. The Syntheses and Structures of Bis(Alkylimino)Isoindolines. *Tetrahedron Lett.* **2013**, *54* (45), 6114–6117.
- (2) Sheldrick, G. M. A Short History of SHELX. *Acta Crystallogr. Sect. A Found. Crystallogr.* **2008**, *64* (1), 112–122.
- (3) Stephens, P. J.; Devlin, F. J.; Chabalowski, C. F.; Frisch, M. J. Ab Initio Calculation of Vibrational Absorption and Circular Dichroism Spectra Using Density Functional Force Fields. *J. Phys. Chem.* **1994**, *98* (45), 11623–11627.
- (4) Tomasi, J.; Mennucci, B.; Cammi, R. Quantum Mechanical Continuum Solvation Models. *Chem. Rev.* **2005**, *105* (8), 2999–3093.
- (5) Pritchard, B. P.; Altarawy, D.; Didier, B.; Gibson, T. D.; Windus, T. L. New Basis Set Exchange: An Open, Up-to-Date Resource for the Molecular Sciences Community. *J. Chem. Inf. Model.* **2019**, *59* (11), 4814–4820.
- (6) McLean, A. D.; Chandler, G. S. Contracted Gaussian Basis Sets for Molecular Calculations. I. Second Row Atoms,  $Z = 11-18$ . *J. Chem. Phys.* **1980**, *72* (10), 5639–5648.
- (7) Frisch, M. J.; Trucks, G. W.; Schlegel, H. B.; Scuseria, G. E.; Robb, M. A.; Cheeseman, J. R.; Scalmani, G.; Barone, V.; Mennucci, B.; Petersson, G. A. Gaussian 09, Revision D. 01, Gaussian, Inc. Wallingford, CT **2009**.
- (8) Tenderholt, A. QMForge. Stanford University: Stanford, CA, USA.
- (9) Spek, A. L. PLATON SQUEEZE: A Tool for the Calculation of the Disordered Solvent Contribution to the Calculated Structure Factors. *Acta Cryst.* **2015**. *C71*, 9–18.
